# Supplementary material for: Isolation of a Diylide‐Stabilized Stannylene and Germylene: Enhanced Donor Strength through Coplanar Lone Pair Alignment
Source: PubMed Central journal article supplement — Angew Chem Int Ed Engl. 2019 Apr 17;58(22):7459–63. doi: 10.1002/anie.201902831 (PMC6563488; doi:10.1002/anie.201902831), 2019-04-17
Supplement: ANIE-58-7459-s001.pdf [file ANIE-58-7459-s001.pdf]

## Supporting Information

### **Isolation of a Diylide-Stabilized Stannylene and Germylene: Enhanced Donor Strength through Coplanar Lone Pair Alignment**

*Chandrajeet Mohapatra, Lennart T. Scharf, Thorsten Scherpf, Bert Mallick, Kai-Stephan Feichtner, Christopher Schwarz, and Viktoria H. Gessner\**

anie\_201902831\_sm\_miscellaneous\_information.pdf

## Supporting Information

### Index

|     |                                                                                                                              |      |
|-----|------------------------------------------------------------------------------------------------------------------------------|------|
| 1.  | Experimental Details                                                                                                         | S2   |
| 2.  | Crystal Structure Determination                                                                                              | S19  |
| 2.1 | General Information                                                                                                          | S19  |
| 2.2 | Crystal Structure of <b>Y<sub>2</sub>Ge</b>                                                                                  | S22  |
| 2.3 | Crystal Structure of <b>Y<sub>2</sub>Sn</b>                                                                                  | S26  |
| 2.4 | Crystal Structure of <b>4</b>                                                                                                | S30  |
| 2.5 | Crystal Structure of <b>5a</b>                                                                                               | S38  |
| 2.6 | Crystal Structure of <b>5b</b>                                                                                               | S43  |
| 2.7 | Crystal Structure of <b>6</b>                                                                                                | S48  |
| 3.  | VT-NMR studies                                                                                                               | S52  |
| 4.  | Computational Studies                                                                                                        | S53  |
| 4.1 | Calculations of the electronic structure                                                                                     | S53  |
| 4.2 | Calculations of the sum of angles in the GaCl <sub>3</sub> complexes<br>and correlation with the Tolman electronic parameter | S56  |
| 4.3 | Mechanism of the C-H activation to <b>4</b>                                                                                  | S58  |
| 4.4 | Coordinates and Energies                                                                                                     | S59  |
| 5.  | References                                                                                                                   | S101 |

## 1. Experimental Details

### 1.1 General methods

All experiments and crystallizations were carried out under a dry, oxygen-free argon atmosphere inside the Glovebox. Involved solvents were dried using an MBraun SPS-800 (THF, toluene, hexane) or dried in accordance with standard procedures.  $^1\text{H}$ ,  $^{13}\text{C}\{^1\text{H}\}$ ,  $^{31}\text{P}\{^1\text{H}\}$  and  $^{119}\text{Sn}$  NMR spectra were recorded on Avance-400 or Avance-250 spectrometers at 25 °C if not stated otherwise. All values of the chemical shift are in ppm regarding the  $\delta$ -scale. All spin-spin coupling constants ( $J$ ) are printed in Hertz (Hz). To display multiplicities and signal forms correctly the following abbreviations were used: s = singlet, d = doublet, m = multiplet, br = broad signal. Elemental analyses were performed on an Elementar vario MICRO-cube elemental analyzer. The Sodium Ylide (**YNa**) was prepared by following the procedure in the literature.<sup>[1]</sup>  $\text{GeCl}_2$ -dioxane and  $\text{SnCl}_2$  (anhydrous) were purchased from Sigma-Aldrich.

### 1.2 Synthesis of $\text{Y}_2\text{Ge}$

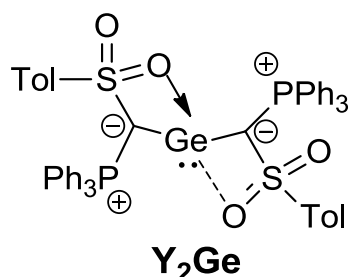

A J-Young NMR tube was filled with **YNa** (39 mg, 0.086 mmol) and  $\text{GeCl}_2$ -dioxane (10 mg, 0.043 mmol) in 2:1 molar ratio. To this mixture,  $\text{C}_6\text{D}_6$  (0.4 mL) was added and the reaction mixture was shaken for 10 minutes to form a pale-yellow solution. The  $^{31}\text{P}$  NMR spectrum of the reaction mixture confirmed the complete consumption of **YNa** and formation of **Y<sub>2</sub>Ge** (~95%) (Figure S1). The reaction mixture was filtered into a glass vial to remove the generated NaCl and the clear solution was kept in hexane vapour for two days to yield **Y<sub>2</sub>Ge** as pure white solid (25 mg, 63% yield based on Ge). The single crystals were grown from a solution of **Y<sub>2</sub>Ge** into a mixture of  $\text{C}_6\text{D}_6$  and THF (5:1) by vapour diffusion technique with hexane vapour.

$^1\text{H}$  NMR (400.3 MHz,  $\text{C}_6\text{D}_6$ ):  $\delta$  1.84 (s, 6H;  $\text{CH}_3$ ), 6.53-6.55 (d, 4H,  $\text{CH}_{\text{STol,meta}}$ ), 6.98-7.07 (m, 18H,  $\text{CH}_{\text{PPh,ortho}}$  and  $\text{CH}_{\text{PPh,para}}$ ), 7.70-7.72 (d, 4H;  $\text{CH}_{\text{STol,ortho}}$ ), 7.97-8.02 (m, 12H;  $\text{CH}_{\text{PPh,meta}}$ ).  $^{13}\text{C}\{^1\text{H}\}$  NMR (100.6 MHz,  $\text{C}_6\text{D}_6$ ):  $\delta$  20.63 ( $\text{CH}_3$ ), 50.92-51.69 (br, d,  $^1J_{\text{PC}} = 77.34$  Hz; PCS), 126.15 ( $\text{CH}_{\text{STol,ortho}}$ ), 127.56 ( $\text{CH}_{\text{STol,meta}}$ ), 127.99-128.12 (d,  $^3J_{\text{PC}} = 12.08$  Hz;  $\text{CH}_{\text{PPh,meta}}$ ), 127.80-129.02 (d,  $^1J_{\text{PC}} = 122.67$  Hz,  $\text{C}_{\text{PPh,ipso}}$ ), 130.99-131.02 (d,  $^4J_{\text{PC}} = 2.75$  Hz;  $\text{CH}_{\text{PPh,para}}$ ), 134.30-134.41 (d,  $^2J_{\text{PC}} = 10.46$  Hz;  $\text{CH}_{\text{PPh,ortho}}$ ), 138.25 ( $\text{C}_{\text{STol,para}}$ ), 147.50-147.51 (br, d,  $^3J_{\text{PC}} = 1.39$  Hz,  $\text{C}_{\text{STol,ipso}}$ ).  $^{31}\text{P}\{^1\text{H}\}$  NMR (162.05 MHz,  $\text{C}_6\text{D}_6$ ): 7.98. Anal. Calcd. for  $\text{C}_{52}\text{H}_{44}\text{GeO}_4\text{P}_2\text{S}_2$ : C, 67.04; H, 4.76. Found: C, 66.84; H, 4.70.

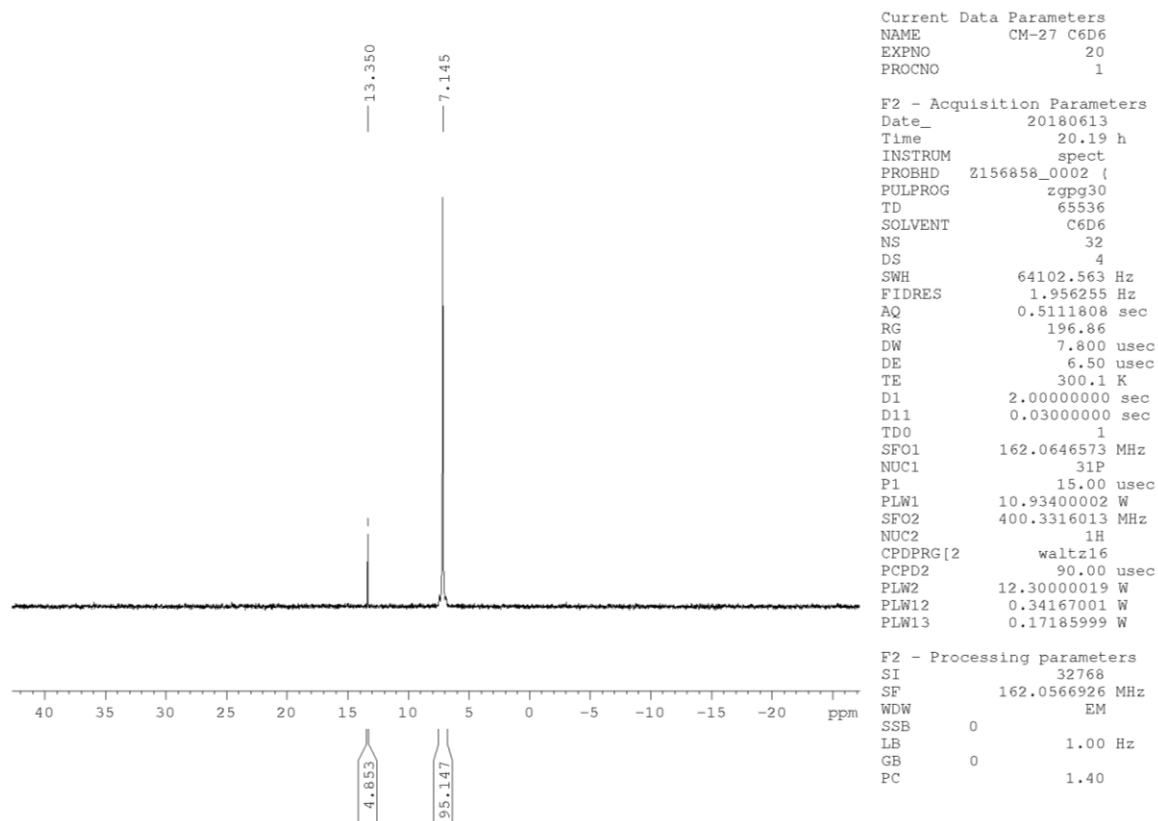

Figure S1.  $^{31}\text{P}\{^1\text{H}\}$  spectrum of the reaction mixture of  $\text{Y}_2\text{Ge}$ .

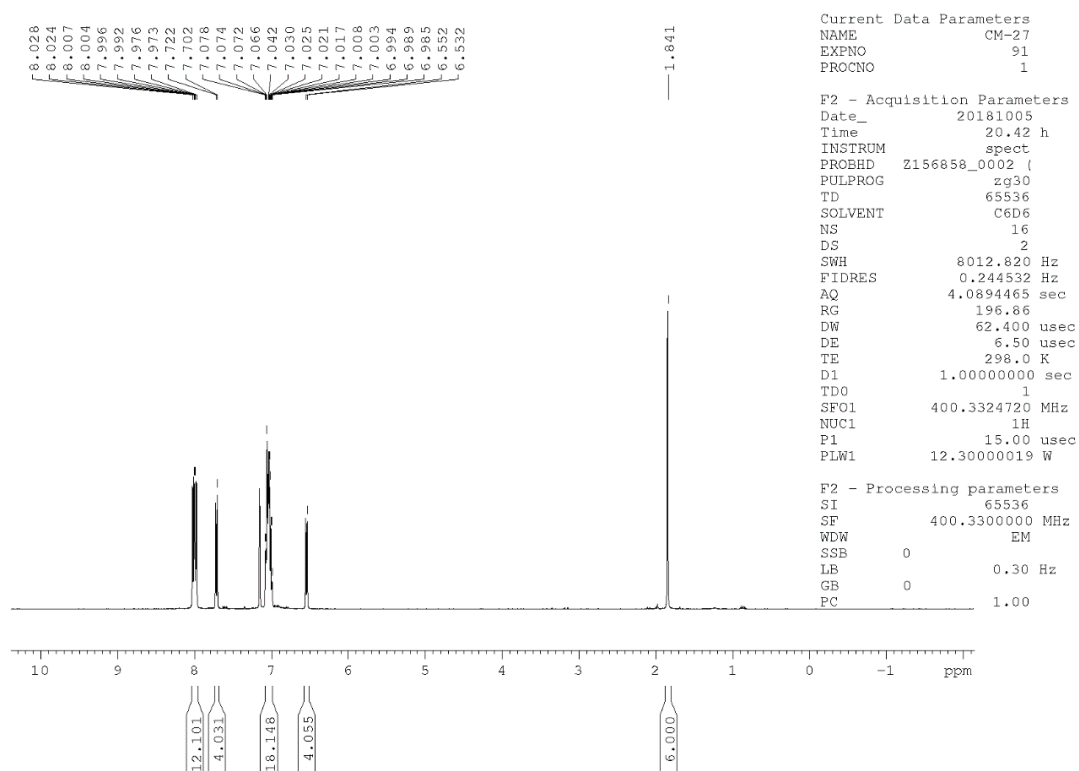

Figure S2.  $^1\text{H}$  NMR spectrum of  $\text{Y}_2\text{Ge}$  in  $\text{C}_6\text{D}_6$ .

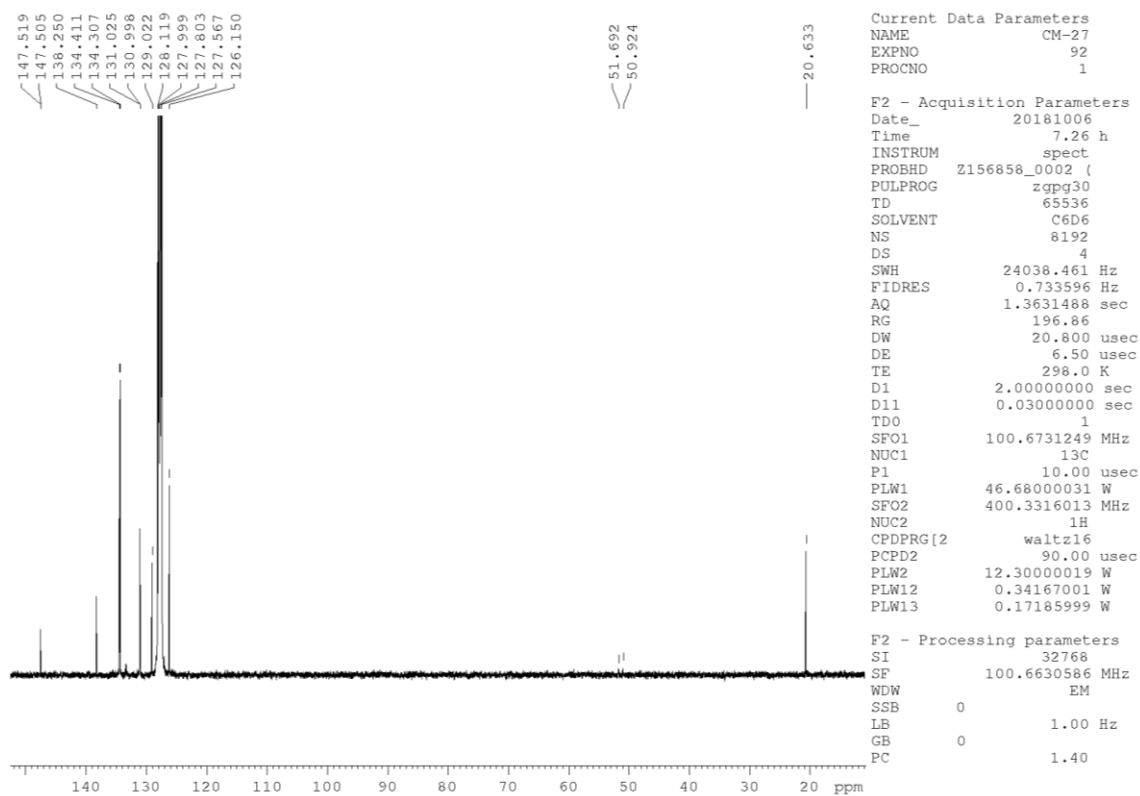

Figure S3.  $^{13}\text{C}\{^1\text{H}\}$  NMR spectrum of  $\text{Y}_2\text{Ge}$  in  $\text{C}_6\text{D}_6$ .

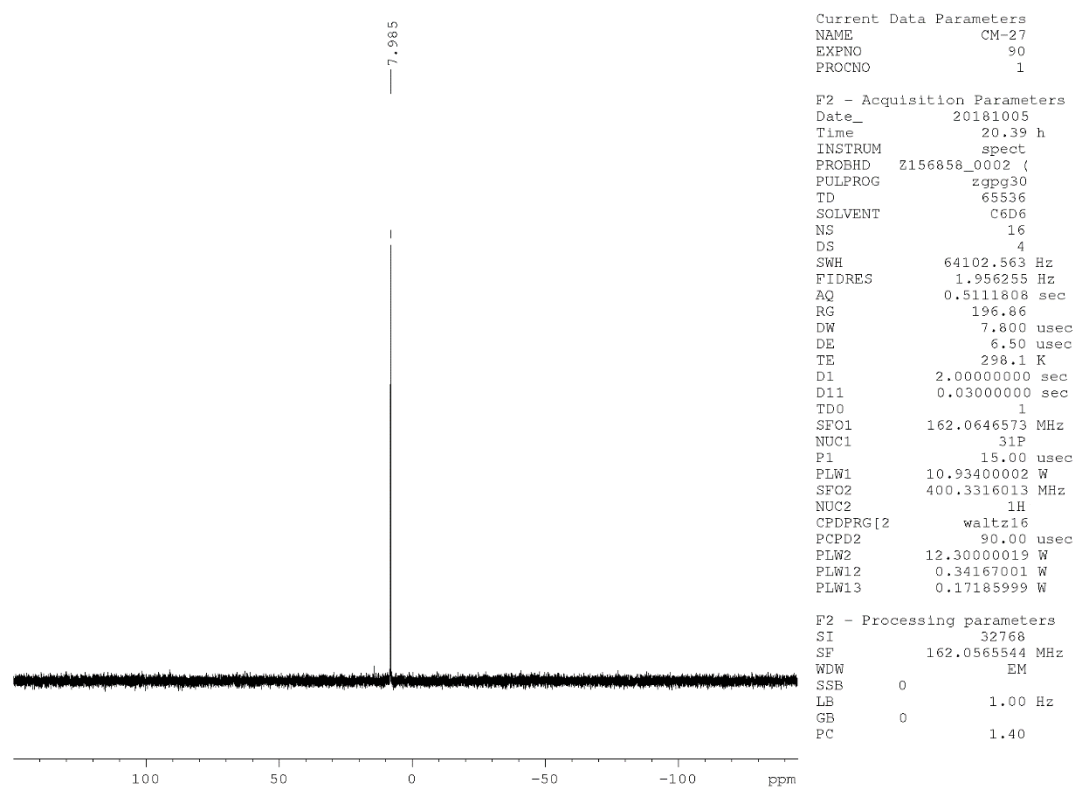

Figure S4.  $^{31}\text{P}\{^1\text{H}\}$  NMR spectrum of  $\text{Y}_2\text{Ge}$  in  $\text{C}_6\text{D}_6$ .

### 1.3 Synthesis of $Y_2Sn$

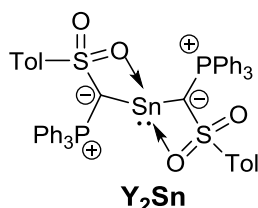

A J-Young NMR tube was filled with  $YNa$  (47 mg, 0.104 mmol) and  $SnCl_2$  (10 mg, 0.052 mmol) in 2:1 molar ratio. To this mixture,  $C_6D_6$  (or Toluene- $d_8$ ) and THF- $d_8$  were added in 4:1 (v/v, total 0.5 mL) and the reaction mixture was shaken for 10 minutes to form a pale-yellow solution. The  $^{31}P$  NMR spectrum of the reaction mixture confirmed the complete consumption of  $YNa$  and the formation of  $Y_2Sn$  (~98%) (Figure S5). The reaction mixture was filtered into a glass vial to remove the formed NaCl. The vial with the obtained clear solution was kept in a vial filled with hexane for 24 hours to yield  $Y_2Sn$  as pure colorless solid (35 mg, 68% yield based on Sn). The single crystals of  $Y_2Sn$  were grown by a similar technique like in case of  $Y_2Ge$ .

$^1H$  NMR (250.13 MHz,  $C_6D_6$ ):  $\delta$  1.96 (s, 6H;  $CH_3$ ), 6.63-6.66 (d, 4H,  $CH_{STol,meta}$ ), 7.09-7.23 (m, 18H,  $CH_{PPh,ortho}$  and  $CH_{PPh,para}$ ), 7.80-7.83 (d, 4H;  $CH_{STol,ortho}$ ), 8.07-8.17 (m, 12H;  $CH_{PPh,meta}$ ).  $^{13}C\{^1H\}$  NMR (100.6 MHz, THF- $d_8$ ):  $\delta$  20.14 ( $CH_3$ ), 52.78-53.42 (br, d,  $^1J_{PC} = 64.29$  Hz; PCS), 125.75 ( $CH_{STol,ortho}$ ), 127.56 ( $CH_{STol,meta}$ ), 127.89-128.02 (d,  $^3J_{PC} = 12.01$  Hz;  $CH_{PPh,meta}$ ), 128.57-129.48 (d,  $^1J_{PC} = 90.77$  Hz,  $C_{PPh,ipso}$ ), 130.82-130.85 (d,  $^4J_{PC} = 2.71$  Hz;  $CH_{PPh,para}$ ), 133.88-133.98 (d,  $^2J_{PC} = 10.28$  Hz;  $CH_{PPh,ortho}$ ), 138.09 ( $C_{STol,para}$ ), 147.73-147.75 (br, d,  $^3J_{PC} = 1.82$  Hz,  $C_{STol,ipso}$ ).  $^{31}P\{^1H\}$  NMR (101.25 MHz,  $C_6D_6$ ): 6.88 (s +  $d_{satellite}$ ,  $^2J_{SnP} = 51.10$  Hz).  $^{119}Sn$  NMR (149.3 MHz, THF- $d_8$ ): -122.23. Anal. Calcd. for  $C_{52}H_{44}O_4P_2S_2Sn$ : C, 63.88; H, 4.54. Found: C, 63.38; H, 4.33.

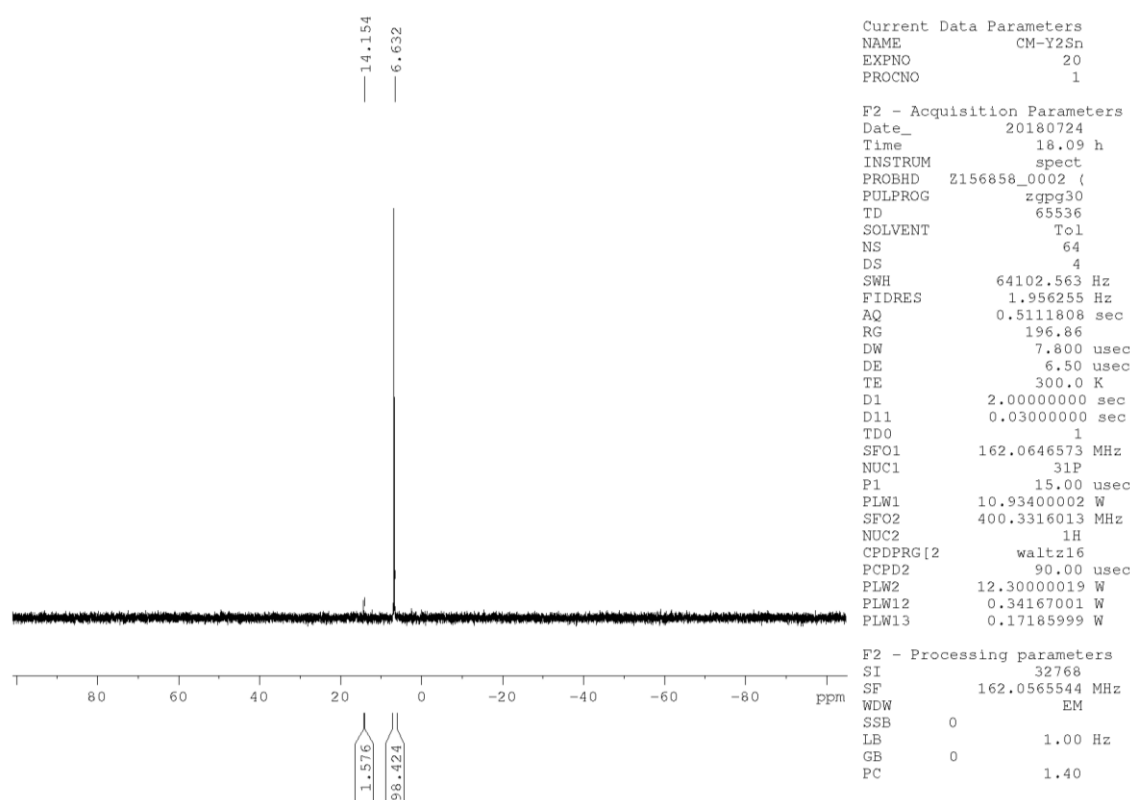

Figure S5.  $^{31}P\{^1H\}$  spectra of the reaction mixture of  $Y_2Sn$ .

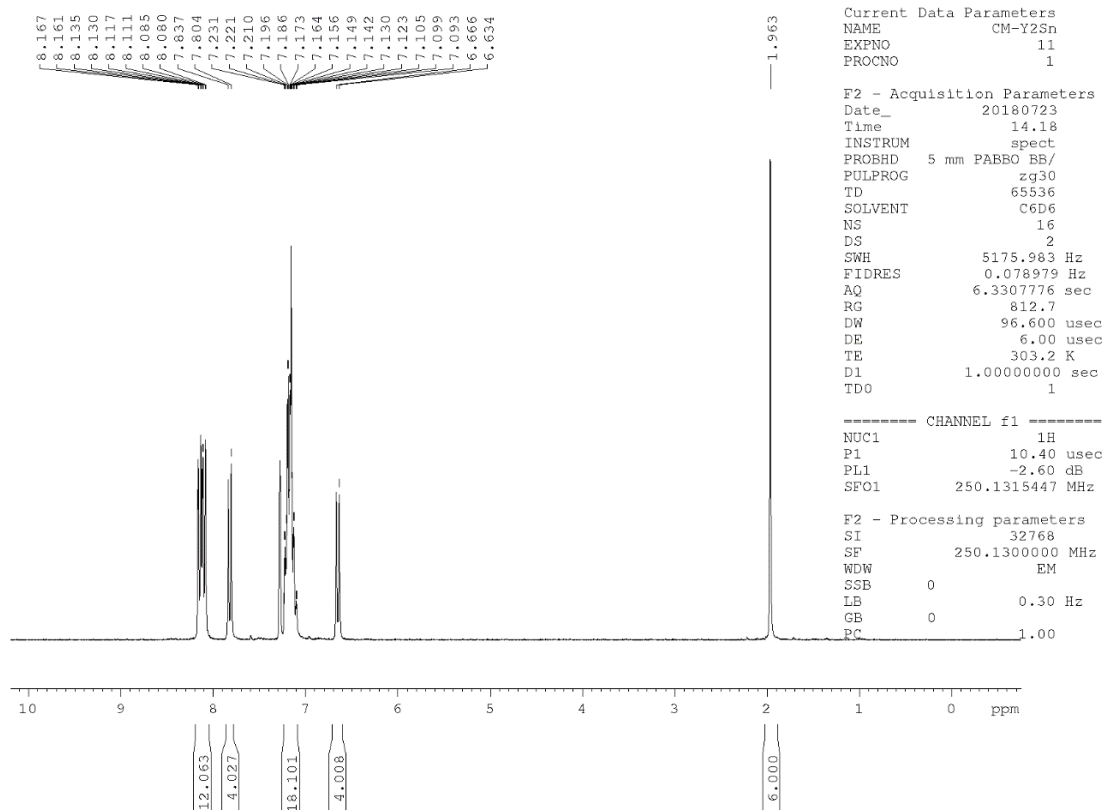Figure S6.  $^1\text{H}$  spectrum of  $\text{Y}_2\text{Sn}$  in  $\text{C}_6\text{D}_6$ .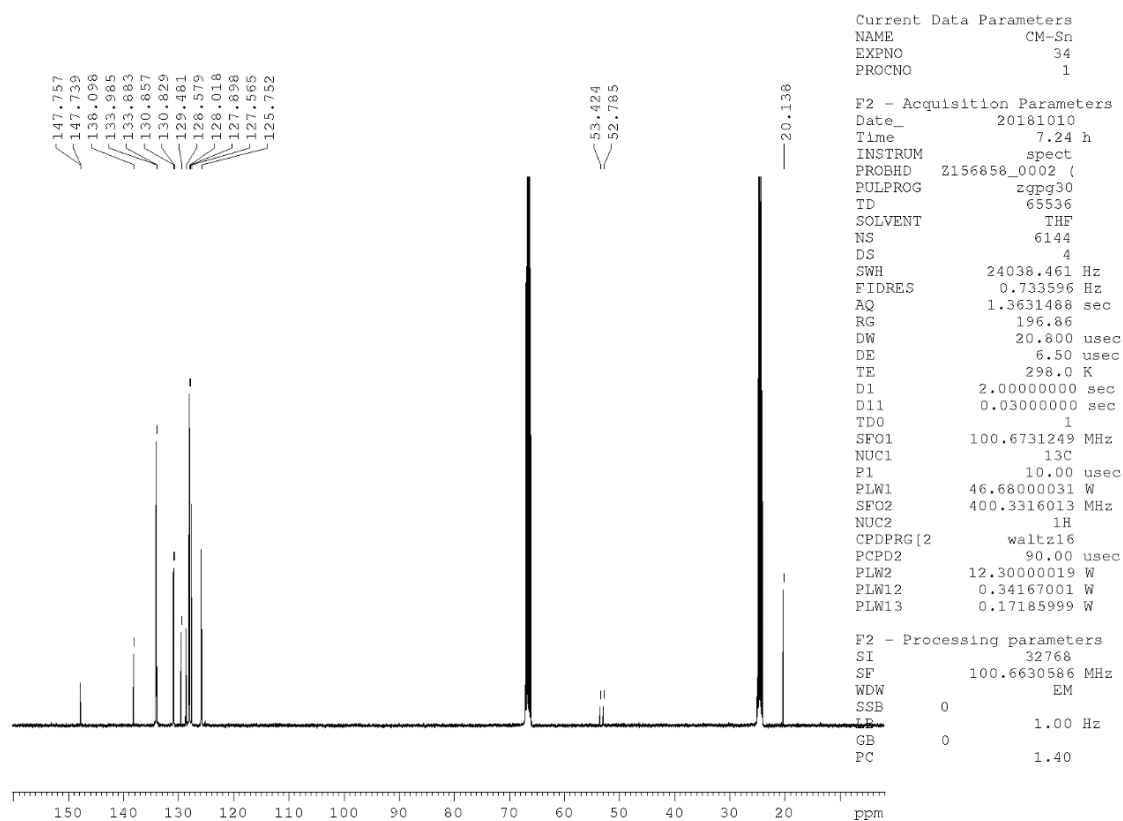Figure S7.  $^{13}\text{C}\{^1\text{H}\}$  spectrum of  $\text{Y}_2\text{Sn}$  in  $\text{THF-d}_8$

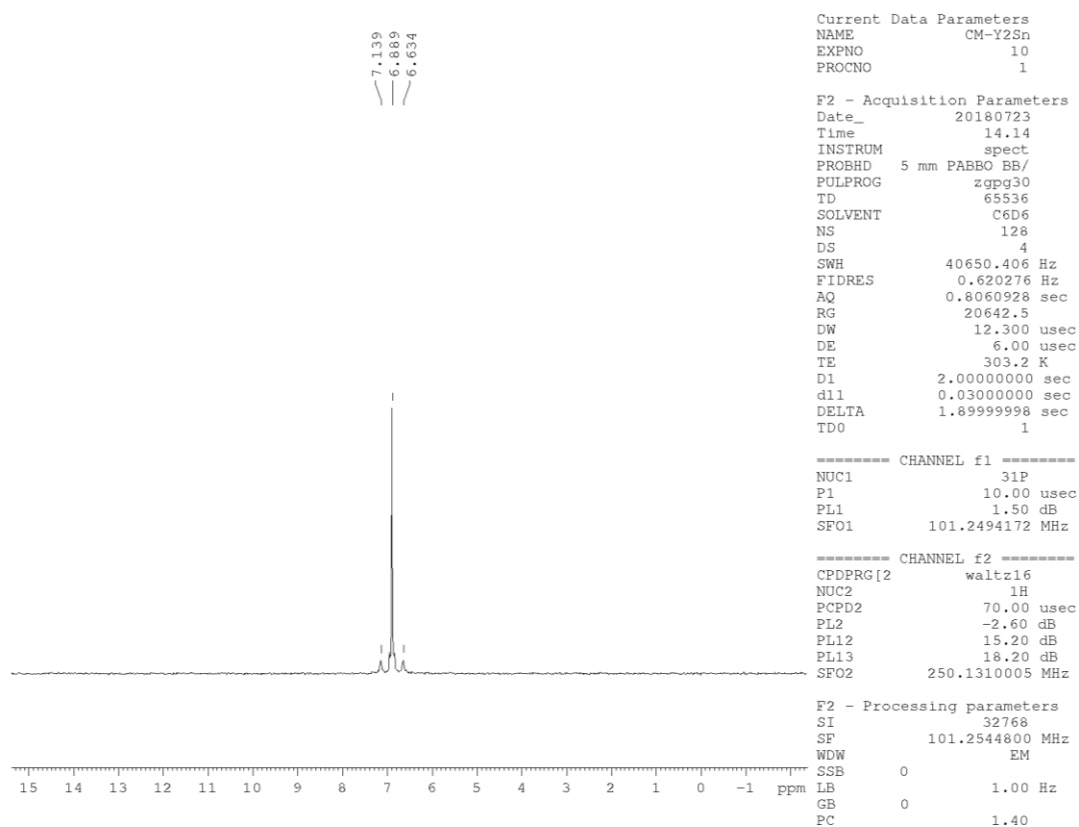

Figure S8.  $^{31}\text{P}\{^1\text{H}\}$  spectrum of  $\text{Y}_2\text{Sn}$  in  $\text{C}_6\text{D}_6$ .

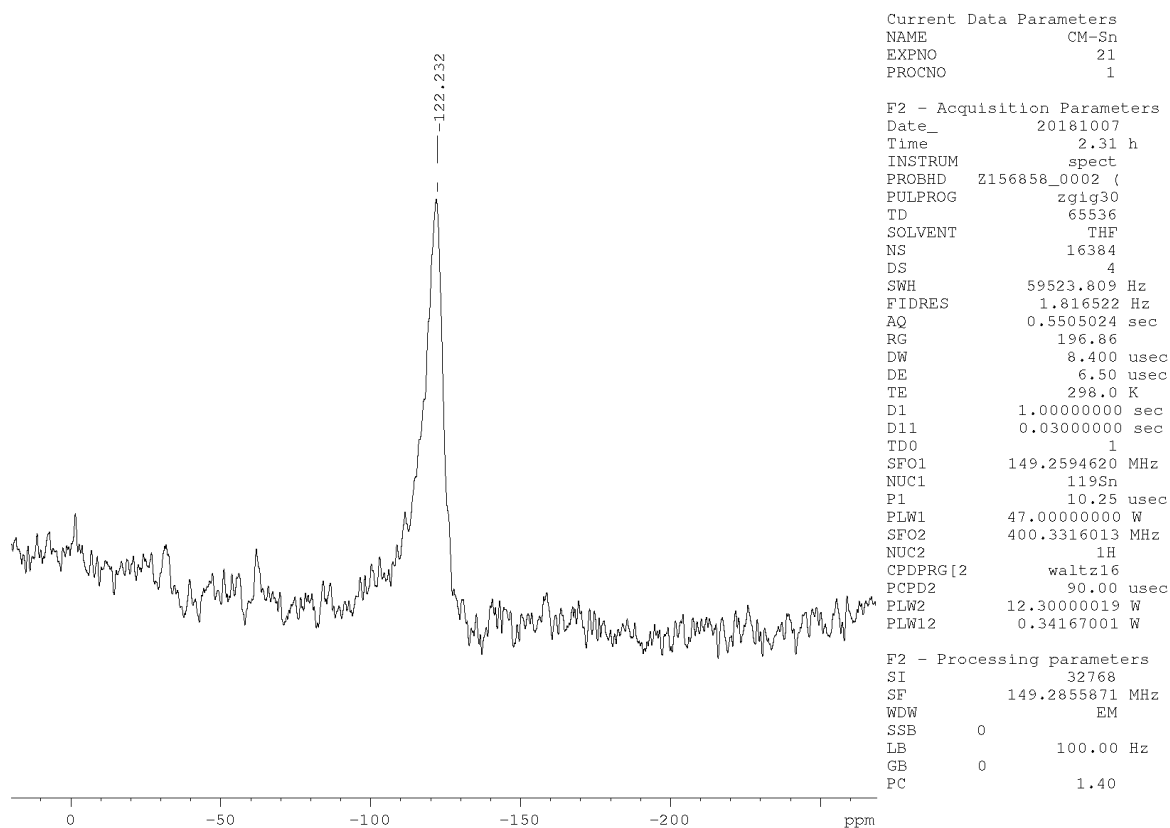

Figure S9.  $^{119}\text{Sn}$  spectrum of  $\text{Y}_2\text{Sn}$  in  $\text{THF-d}_8$ .



### 1.4 Synthesis of $Y_4Ge_4$ (**4**)

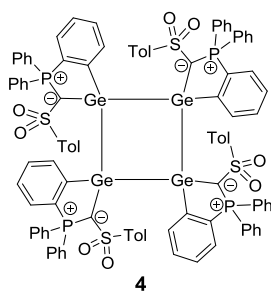

In a J-Young NMR tube  $Y_2Ge$  (25mg, 0.027 mmol) was dissolved in toluene- $d_8$  (0.4 mL). The solution was heated to 90 °C for 1 hour. During heating, the colour of the solution changed from a pale-yellow to intense yellow and yellow solid precipitated from the solution. The complete consumption of  $Y_2Ge$  and liberation of the ylide (**Y**) was confirmed by  $^{31}P$  NMR spectroscopy of the reaction mixture. The yellow solid was separated by decanting/removing of the supernatant yellow solution (containing **Y** and other side products along with some amount of **4**). The solid was again dissolved in toluene (0.4 mL) by heating at 90 °C and the solution was cooled to room temperature and allowed to stand overnight to get single crystals of **4** (9 mg, 33% yield base on **Y**). The single crystals were suitable for X-Ray structure determination and other characterizations.

$^1H$  NMR (400.3 MHz, THF- $d_8$ ):  $\delta$  1.79 (s, 12H;  $CH_3$ ), 5.63-5.65 (d, 8H,  $CH_{STol,meta}$ ), 6.11-6.13 (d, 8H;  $CH_{STol,ortho}$ ), 6.84-6.87 (m, 16H,  $CH_{PPh,ortho}$ ), 7.08-7.18 (m, 16H;  $CH_{PPh,meta}$ ), 7.26-7.44 (m, 20H,  $CH_{PPh,para}$  and  $CH_{PPhcyclo,ortho,meta}$  and para), 9.65-9.68 (d, 4H,  $CH_{PPhcyclo,GeCCH}$ ).  $^{13}C\{^1H\}$  NMR (100.6 MHz, THF- $d_8$ ):  $\delta$  20.03 ( $CH_3$ ), 37.07-37.88 (br, d,  $^1J_{PC} = 81.27$  Hz; PCS), 124.52 ( $CH_{STol,ortho}$ ), 126.66-127.65 (d,  $^1J_{PC} = 100.7$  Hz,  $C_{PPh,ipso}$ ), 127.42-128.31 (d,  $^1J_{PC} = 89.7$  Hz,  $C_{PPhcyclo,ipso}$ ), 127.90-128.01 (d,  $^2J_{PC} = 11.19$  Hz;  $CH_{PPh,ortho}$ ), 128.57-128.70 (d,  $^3J_{PC} = 12.93$  Hz;  $CH_{PPh,meta}$ ), 130.78-130.81 (d,  $^4J_{PC} = 3.11$  Hz;  $CH_{PPh,para}$ ), 130.87-130.90 (d,  $^4J_{PC} = 2.70$  Hz;  $CH_{PPhcyclo,para}$ ), 133.80-133.91 (d,  $^2J_{PC} = 10.82$  Hz;  $CH_{PPhcyclo,ortho}$ ), 135.43 ( $CH_{STol,meta}$ ), 136.17 ( $C_{STol,para}$ ), 141.24-141.36 (br, d,  $^3J_{PC} = 12.10$  Hz;  $CH_{PPhcyclo,meta}$  and GeCCH), 147.28 ( $C_{STol,ipso}$ ), 151.78-151.98 (d,  $^2J_{PC} = 20.73$  Hz;  $CH_{PPhcyclo,GeC}$ ).  $^{31}P\{^1H\}$  NMR (162.05 MHz, THF- $d_8$ ): 15.73. Anal. Calcd. for  $C_{104}H_{84}Ge_4O_8P_4S_4$ : C, 62.32; H, 4.22. Found: C, 61.44; H, 3.88.

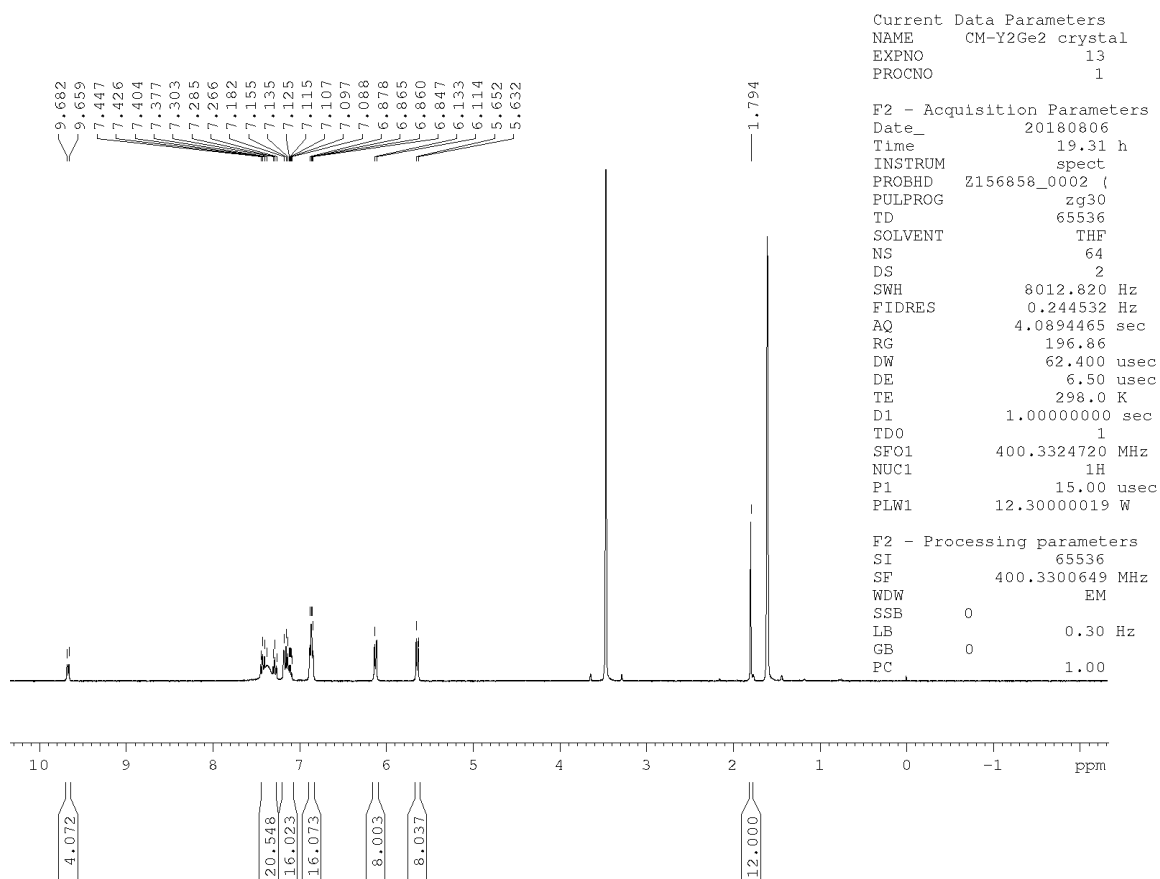

Figure S10.  $^1\text{H}$  spectrum of **4** in THF- $d_8$ .

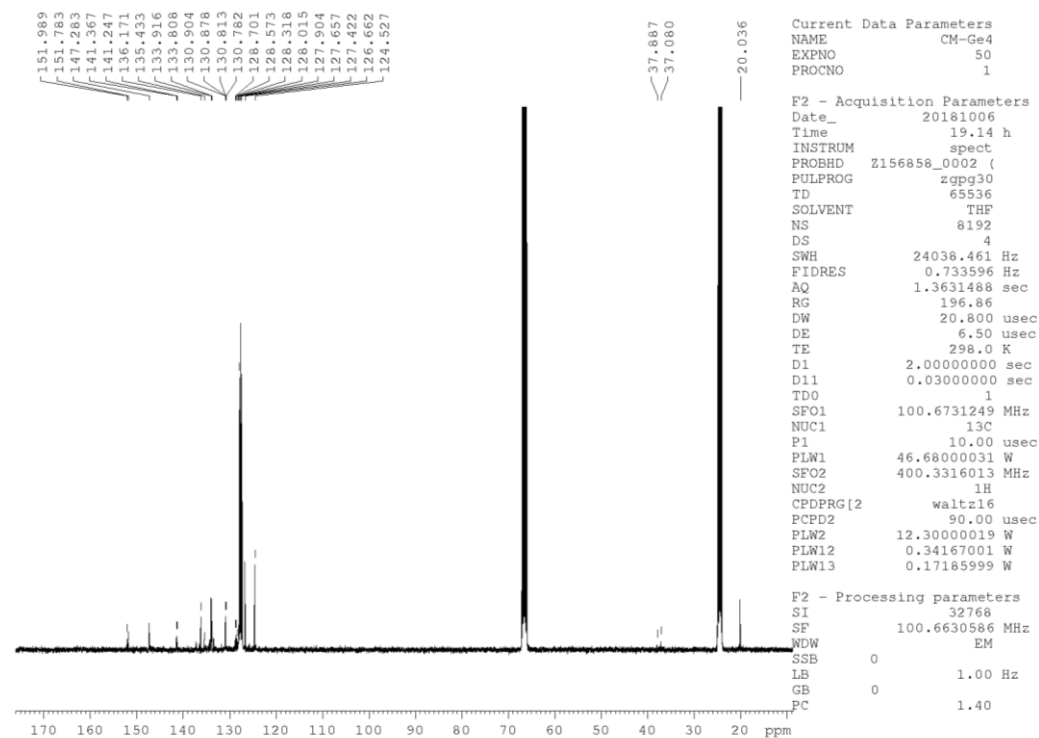

Figure S11.  $^{13}\text{C}\{^1\text{H}\}$  spectrum of **4** in THF- $d_8$ .

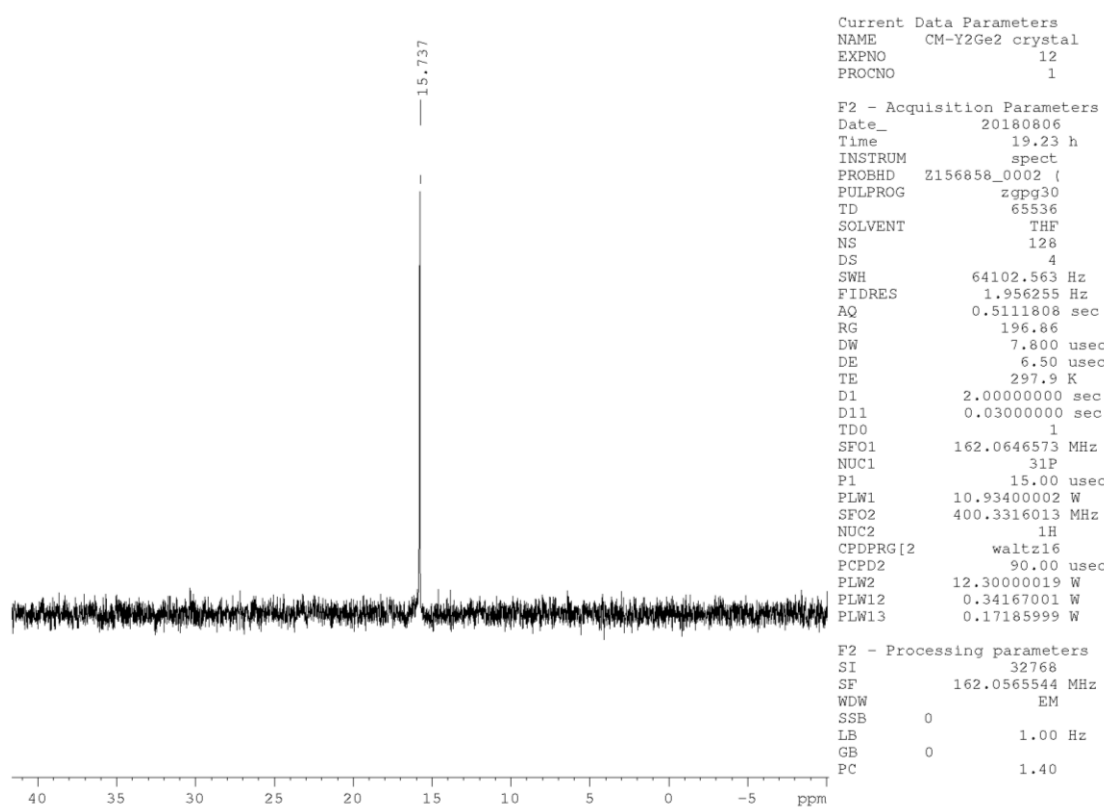

Figure S12.  $^{31}\text{P}\{^1\text{H}\}$  spectrum of **4** in THF- $d_8$ .

## 1.5 Synthesis of $\text{Y}_2\text{GeBQ}$ (**5a**)

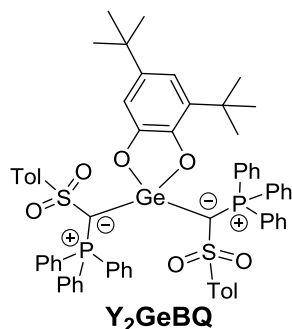

A J-Young-NMR tube was filled with  $\text{Y}_2\text{Ge}$  (40 mg, 0.043 mmol) and 3,5-Di-*tert*-butyl-*o*-benzoquinone (BQ) (9.5 mg, 0.043 mmol) in 1:1 molar ratio. To this mixture,  $\text{C}_6\text{D}_6$  and THF- $d_8$  were added in 4:1 (v/v, total 0.5 mL) and the reaction mixture was shaken for 15 minutes to form a colourless solution. The  $^{31}\text{P}$  NMR spectrum of the reaction mixture confirmed the formation of **5a** (~75%) (Figure S13). The reaction mixture was filtered into a glass vial and kept in a further vial with hexane for two days to yield **5a** as pure colorless solid (26 mg, 52%). Single crystals of **5a** were grown by a similar method like in case of  $\text{Y}_2\text{Ge}$ .

$^1\text{H}$  NMR (400.3 MHz, THF- $d_8$ ):  $\delta$  0.95 (s, 9H;  $\text{CH}_3$  BQ, *t*Bu), 1.10 (s, 9H;  $\text{CH}_3$  BQ, *t*Bu), 2.27 (s, 12H;  $\text{CH}_3$ STol), 5.61-5.62 (br, d, 1H;  $\text{C}(\text{tBu})\text{CHC}(\text{tBu})$  BQ), 6.25-6.26 (br, d, 1H;  $\text{OCCHC}(\text{tBu})$  BQ), 6.82-6.84 (d, 4H;  $\text{CH}_{\text{STol,meta}}$ ), 7.13-7.18 (m, 12H;  $\text{CH}_{\text{PPh,ortho}}$ ), 7.33-7.37 (m, 6H;  $\text{CH}_{\text{PPh,para}}$ ), 7.44-7.63 (br, m, 4H;  $\text{CH}_{\text{STol,ortho}}$ ), 7.69-7.74 (m, 12H;  $\text{CH}_{\text{STol,ortho}}$  and  $\text{CH}_{\text{PPh,meta}}$ ).  $^{13}\text{C}\{^1\text{H}\}$  NMR (100.6 MHz, THF- $d_8$ ):  $\delta$  20.25 ( $\text{CH}_3$ STol), 22.52 ( $\text{C}(\text{tBu})$ BQ), 29.34 ( $\text{CH}_3$  BQ, *t*Bu), 31.23 ( $\text{CH}_3$  BQ, *t*Bu), 31.58 ( $\text{C}(\text{tBu})$ BQ), 33.58-33.86 (br, d,  $^1J_{\text{PC}} = 27.84$  Hz; PCS), 108.45 ( $\text{OCCHC}(\text{tBu})$  BQ), 111.56 ( $\text{C}(\text{tBu})\text{CHC}(\text{tBu})$  BQ), 125.53-126.44 (d,  $^1J_{\text{PC}} = 92.11$  Hz,  $\text{C}_{\text{PPh,ipso}}$ ), 127.03

(CH<sub>STol,ortho</sub>), 127.34-127.46 (d,  $^3J_{PC}$  = 12.60 Hz; CH<sub>PPH,meta</sub>), 127.54 (CH<sub>STol,meta</sub>), 131.12-131.14 (d,  $^4J_{PC}$  = 2.79 Hz; CH<sub>PPH,para</sub>), 131.96 (OCC(tBu)<sub>BQ</sub>), 134.92-135.02 (d,  $^2J_{PC}$  = 10.47 Hz; CH<sub>PPH,ortho</sub>), 138.90 (OCC(tBu)<sub>BQ</sub>), 139.00 (C<sub>STol,para</sub>), 145.65 (OCCH<sub>BQ</sub>), 146.63 (C<sub>STol,ipso</sub>), 149.96 (CHC(tBu)CH<sub>BQ</sub>).  $^{31}\text{P}\{^1\text{H}\}$  NMR (162.05 MHz, THF-d<sub>8</sub>): 16.53. Anal. Calcd. for C<sub>66</sub>H<sub>64</sub>O<sub>6</sub>P<sub>2</sub>S<sub>2</sub>Ge: C, 68.82; H 5.60 Found: C, 69.19; H, 5.71.

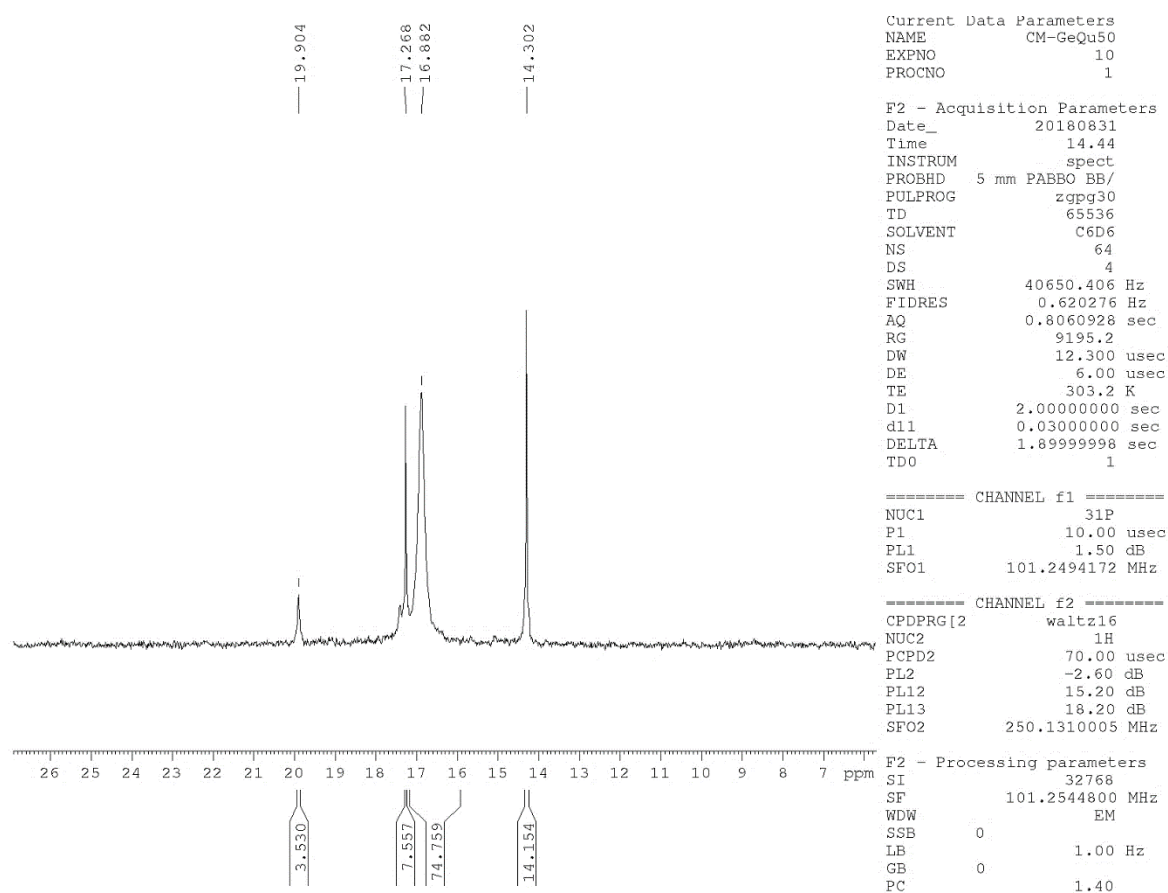

**Figure S13.**  $^{31}\text{P}\{^1\text{H}\}$  spectrum of the reaction mixture of **5a**.

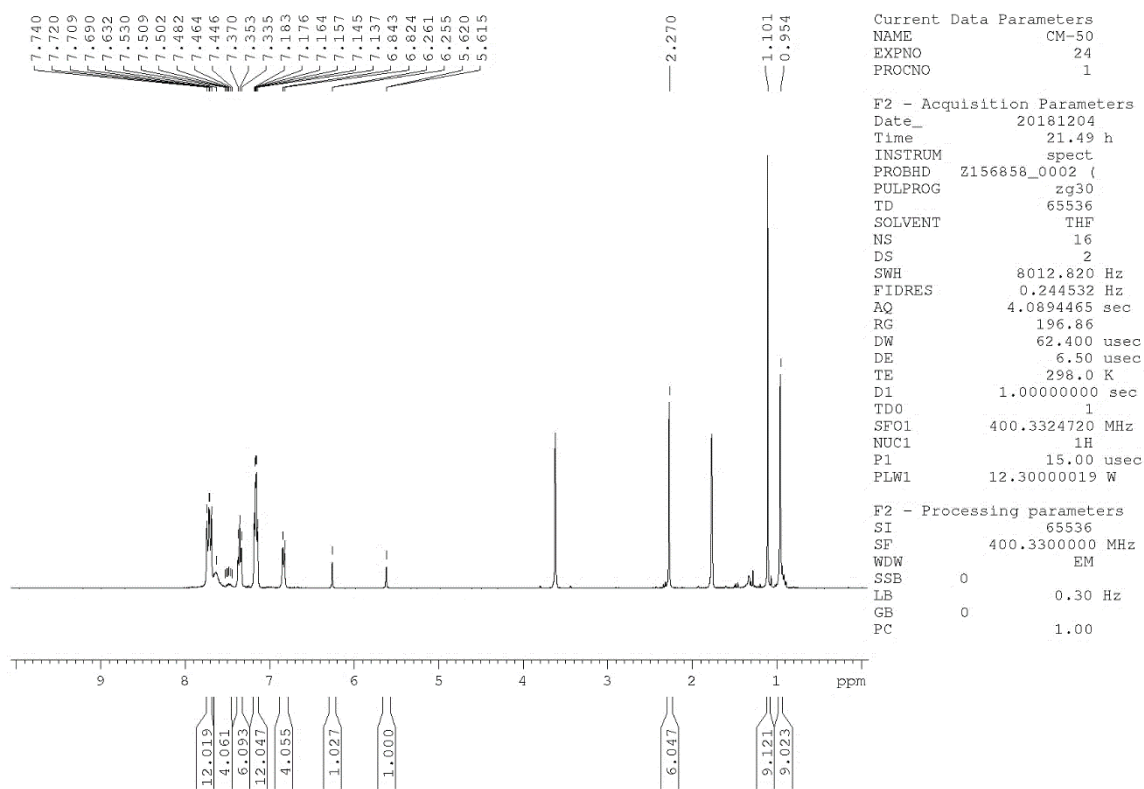Figure S14.  $^1\text{H}$  spectra of **5a** in  $\text{THF-d}_8$ .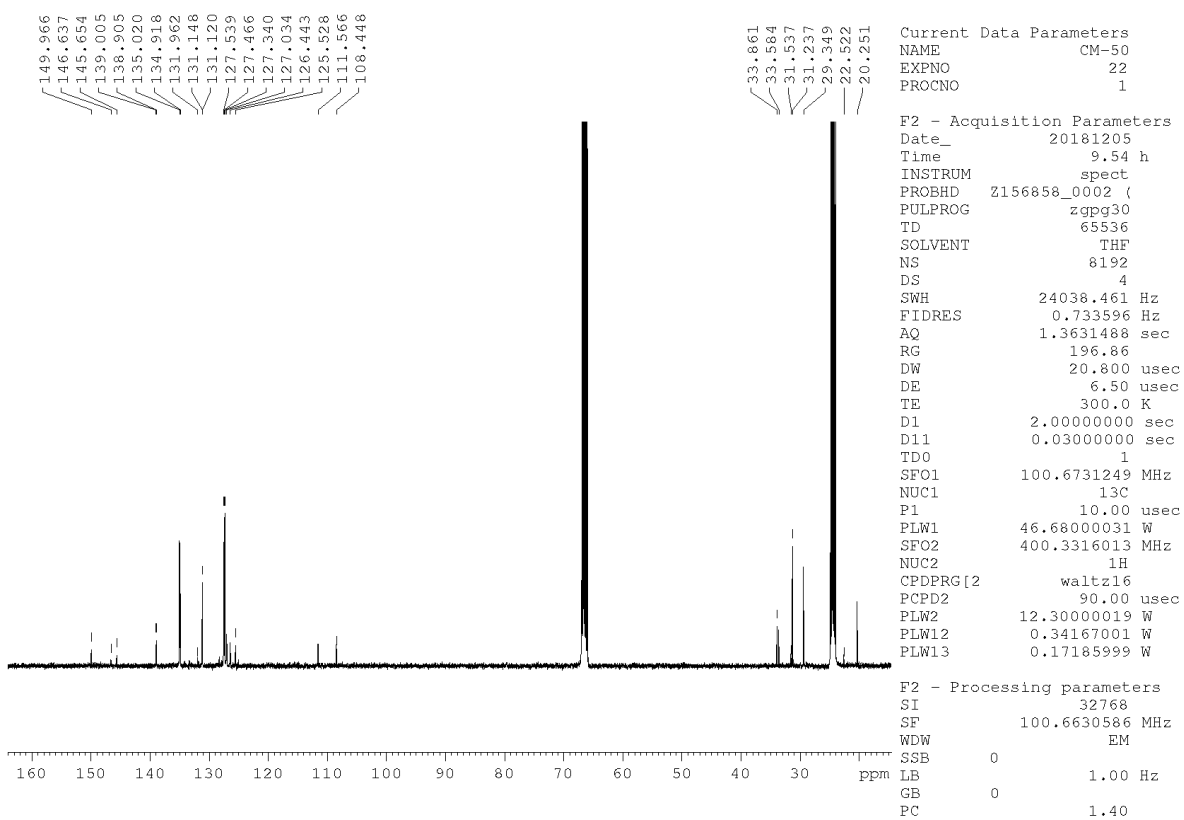Figure S15.  $^{13}\text{C}\{^1\text{H}\}$  spectra of **5a** in  $\text{THF-d}_8$ .

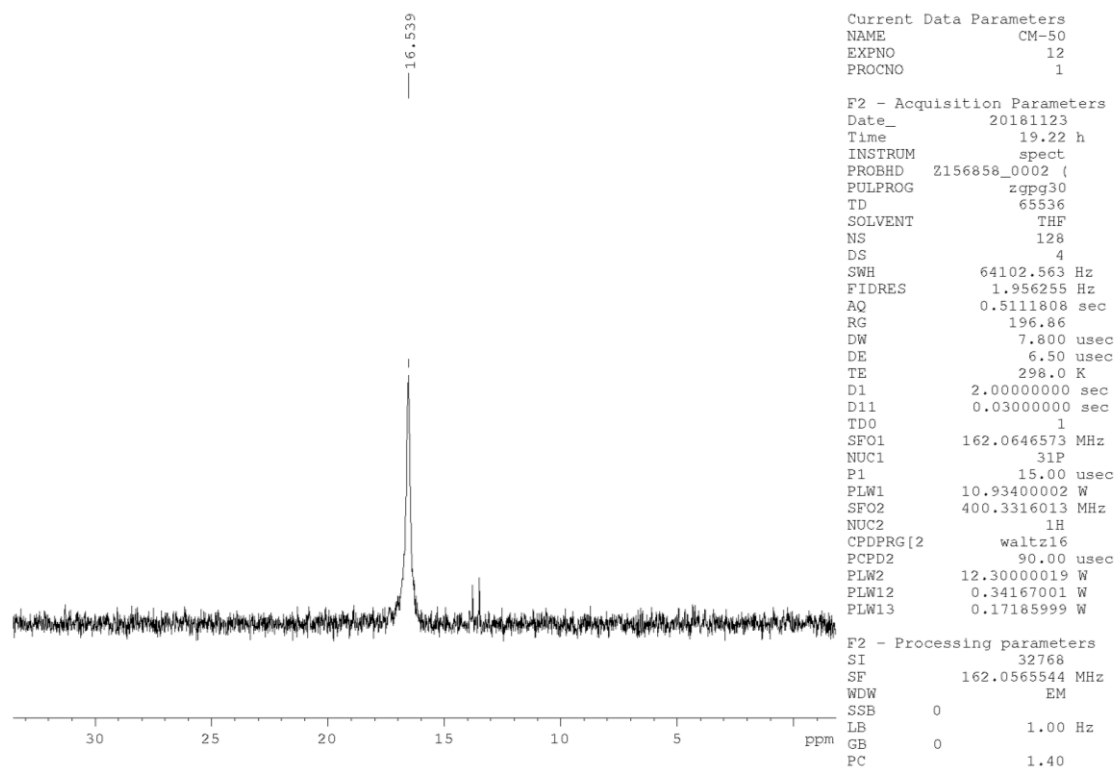

Figure S16.  $^{31}\text{P}\{^1\text{H}\}$  spectrum of **5a** in THF- $d_8$ .

## 1.6 Synthesis of $\text{Y}_2\text{SnBQ}$ (**5b**)

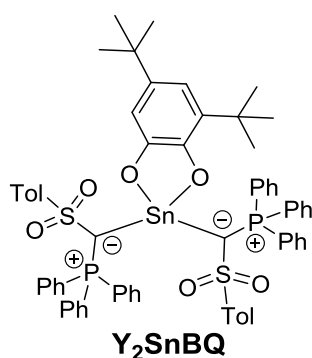

A J-Young-NMR tube was filled with  $\text{Y}_2\text{Sn}$  (51 mg, 0.052 mmol) and 3,5-Di-*tert*-butyl-*o*-benzoquinone (BQ) (11.4 mg, 0.052 mmol) in 1:1 molar ratio. To this mixture,  $\text{C}_6\text{D}_6$  and THF- $d_8$  were added in 4:1 (v/v, total 0.5 mL) and the reaction mixture was shaken for 15 minutes to form a colourless solution. The  $^{31}\text{P}$  NMR spectrum of the reaction mixture confirmed the formation of **5b** (~92%) (Figure S17). The reaction mixture was filtered into a glass vial giving a clear solution, which was kept in further vial filled with hexane overnight to yield **5b** as pure colorless solid (42 mg, 67% yield). Single crystals of **5b** were grown by a similar method like in case of  $\text{Y}_2\text{Ge}$ .

$^1\text{H}$  NMR (400.3 MHz, THF- $d_8$ ):  $\delta$  0.93 (s, 9H;  $\text{CH}_3$  BQ, *t*Bu), 1.27 (s, 9H;  $\text{CH}_3$  BQ, *t*Bu), 2.31 (s, 12H;  $\text{CH}_3$  STol), 6.16 (br, s, 1H;  $\text{C}(\textit{t}\text{Bu})\text{CHC}(\textit{t}\text{Bu})$  BQ), 6.33-6.34 (br, d, 1H;  $\text{OCCHC}(\textit{t}\text{Bu})$  BQ), 6.92-6.94 (d, 4H;  $\text{CH}_{\text{STol,meta}}$ ), 7.15-7.20 (m, 12H;  $\text{CH}_{\text{PPh,ortho}}$ ), 7.37-7.41 (m, 6H;  $\text{CH}_{\text{PPh,para}}$ ), 7.63-7.68 (m, 16H;  $\text{CH}_{\text{STol,ortho}}$  and  $\text{CH}_{\text{PPh,meta}}$ ).  $^{13}\text{C}\{^1\text{H}\}$  NMR (100.6 MHz, THF- $d_8$ ):  $\delta$  20.28 ( $\text{CH}_3$  STol), 26.77 ( $\text{C}(\textit{t}\text{Bu})_{\text{BQ}}$ ), 29.45 ( $\text{CH}_3$  BQ, *t*Bu), 31.53 ( $\text{CH}_3$  BQ, *t*Bu), 33.68-34.06 (br, d,  $^1J_{\text{PC}} = 38.33$  Hz; PCS), 34.48 ( $\text{C}(\textit{t}\text{Bu})_{\text{BQ}}$ ), 109.95

(OCCHC(*t*Bu)<sub>BQ</sub>), 110.11 (C(*t*Bu)CHC(*t*Bu)<sub>BQ</sub>), 125.14 (CH<sub>STol,ortho</sub>), 126.06 (CH<sub>STol,meta</sub>), 127.16-127.93 (d,  $^1J_{PC} = 78.11$  Hz, C<sub>Ph,ipso</sub>), 127.78-127.91 (d,  $^3J_{PC} = 12.75$  Hz; CH<sub>Ph,meta</sub>), 131.48-131.51 (d,  $^4J_{PC} = 2.84$  Hz; CH<sub>Ph,para</sub>), 132.78 (OCC(*t*Bu)<sub>BQ</sub>), 134.40-134.50 (d,  $^2J_{PC} = 10.47$  Hz; CH<sub>Ph,ortho</sub>), 137.05 (OCC(*t*Bu)<sub>BQ</sub>), 139.53 (C<sub>STol,para</sub>), 145.66 (OCCH<sub>BQ</sub>), 148.53 (C<sub>STol,ipso</sub>), 151.97 (CHC(*t*Bu)CH<sub>BQ</sub>).  $^{31}\text{P}\{^1\text{H}\}$  NMR (162.05 MHz, THF-*d*<sub>8</sub>): 12.55.  $^{119}\text{Sn}$  NMR (149.3 MHz, THF-*d*<sub>8</sub>): -241.35 (br). Anal. Calcd. for C<sub>66</sub>H<sub>64</sub>O<sub>6</sub>P<sub>2</sub>S<sub>2</sub>Sn: C, 66.17; H, 5.38 Found: C, 65.93; H, 4.97.

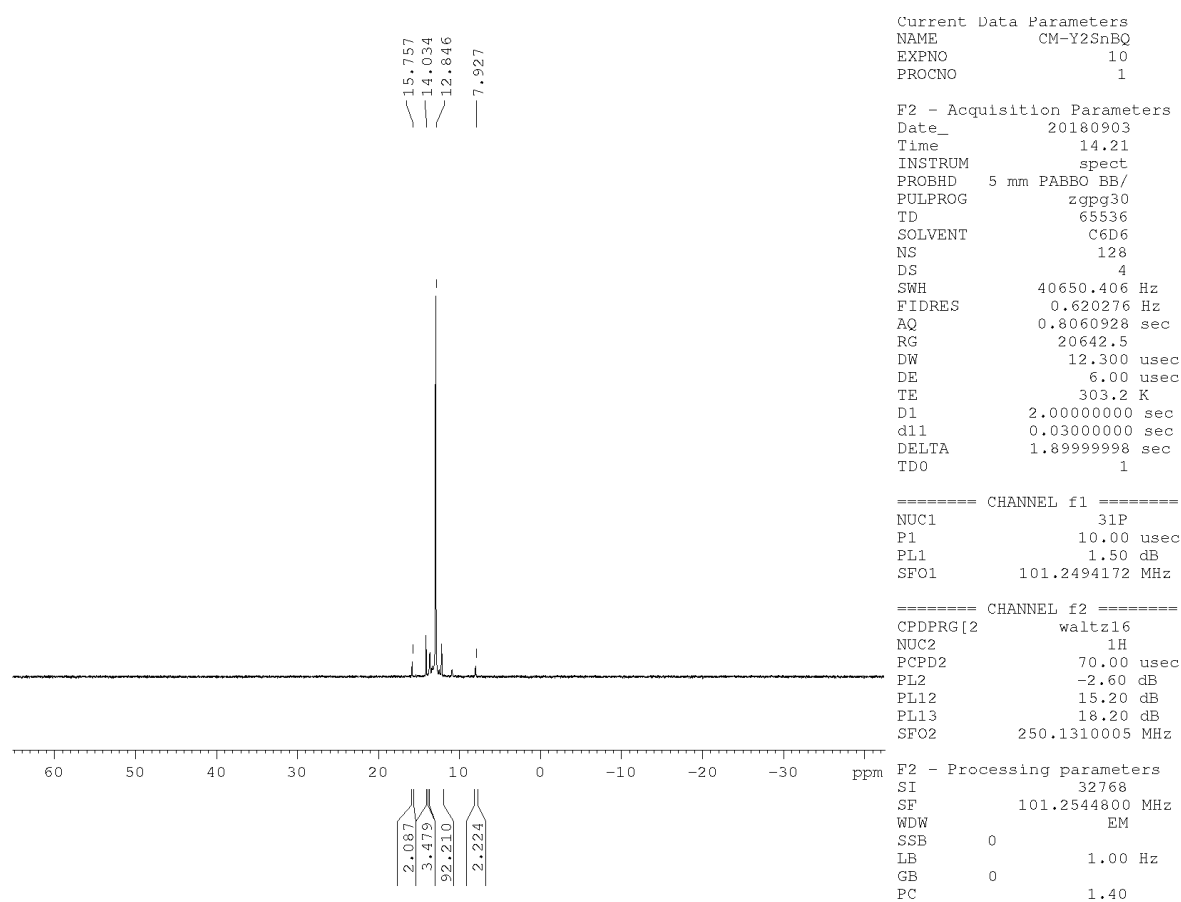

Figure S17.  $^{31}\text{P}\{^1\text{H}\}$  spectrum of the reaction mixture of **5b**.

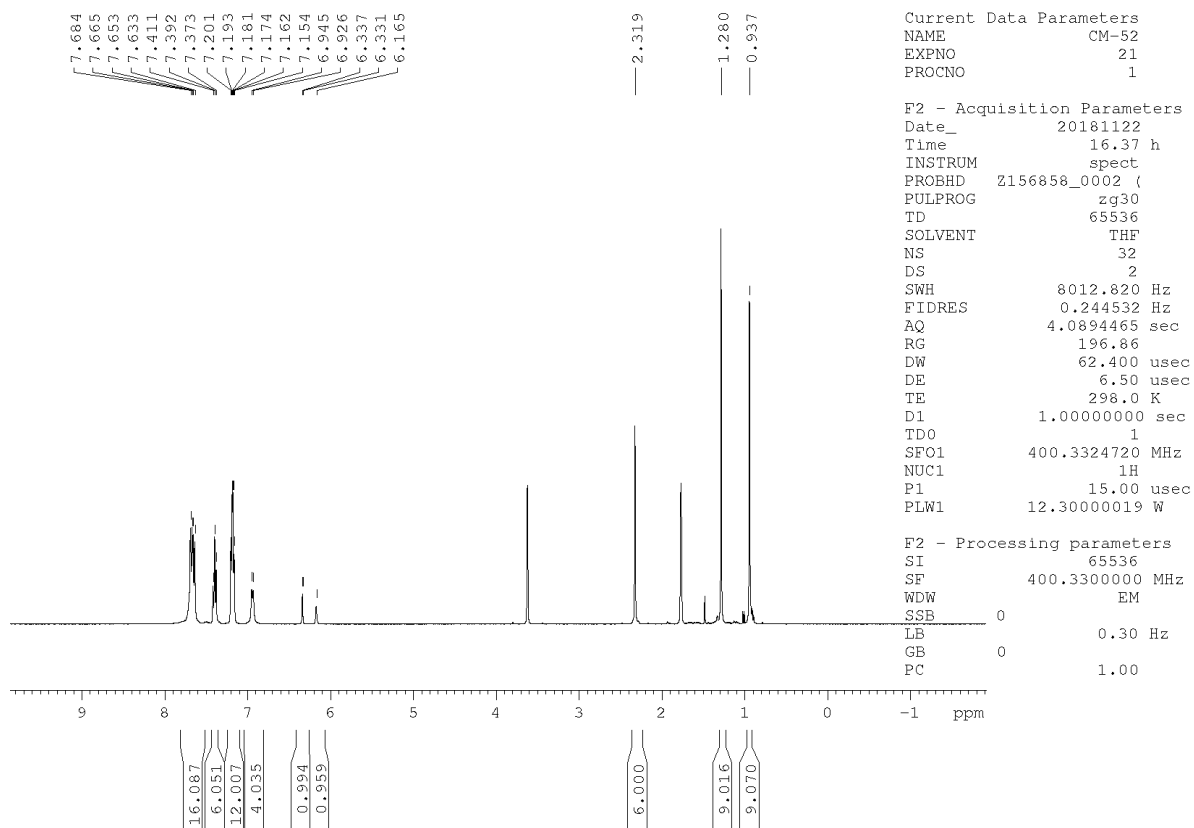Figure S18.  $^1\text{H}$  spectrum of **5b** in  $\text{THF-d}_8$ .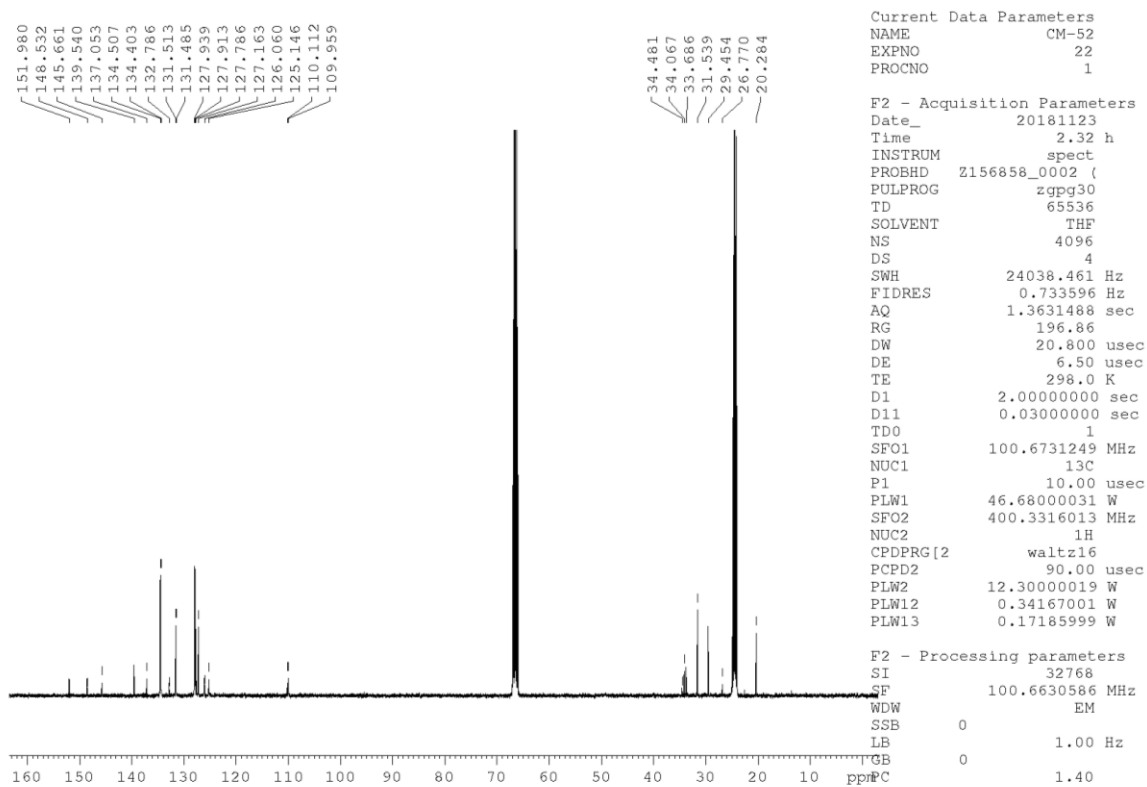Figure S19.  $^{13}\text{C}\{^1\text{H}\}$  spectrum of **5b** in  $\text{THF-d}_8$ .



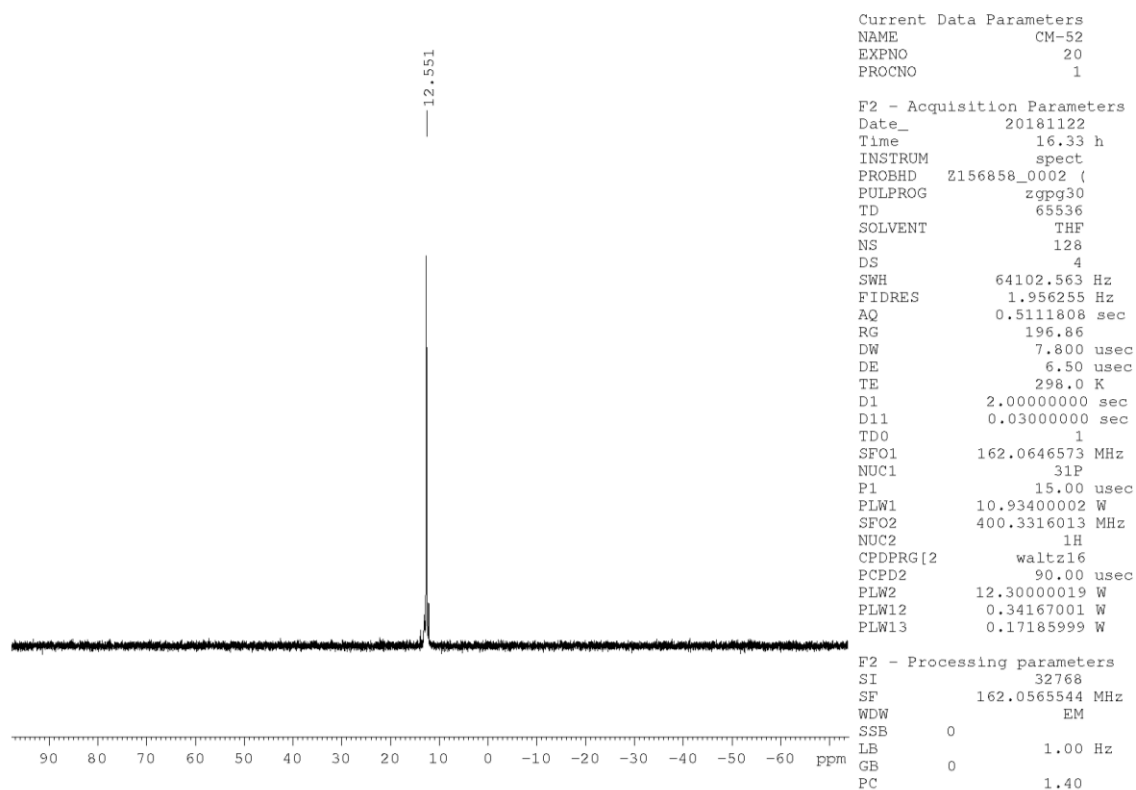

Figure S20.  $^{31}\text{P}\{^1\text{H}\}$  spectrum of **5b** in THF- $d_8$ .

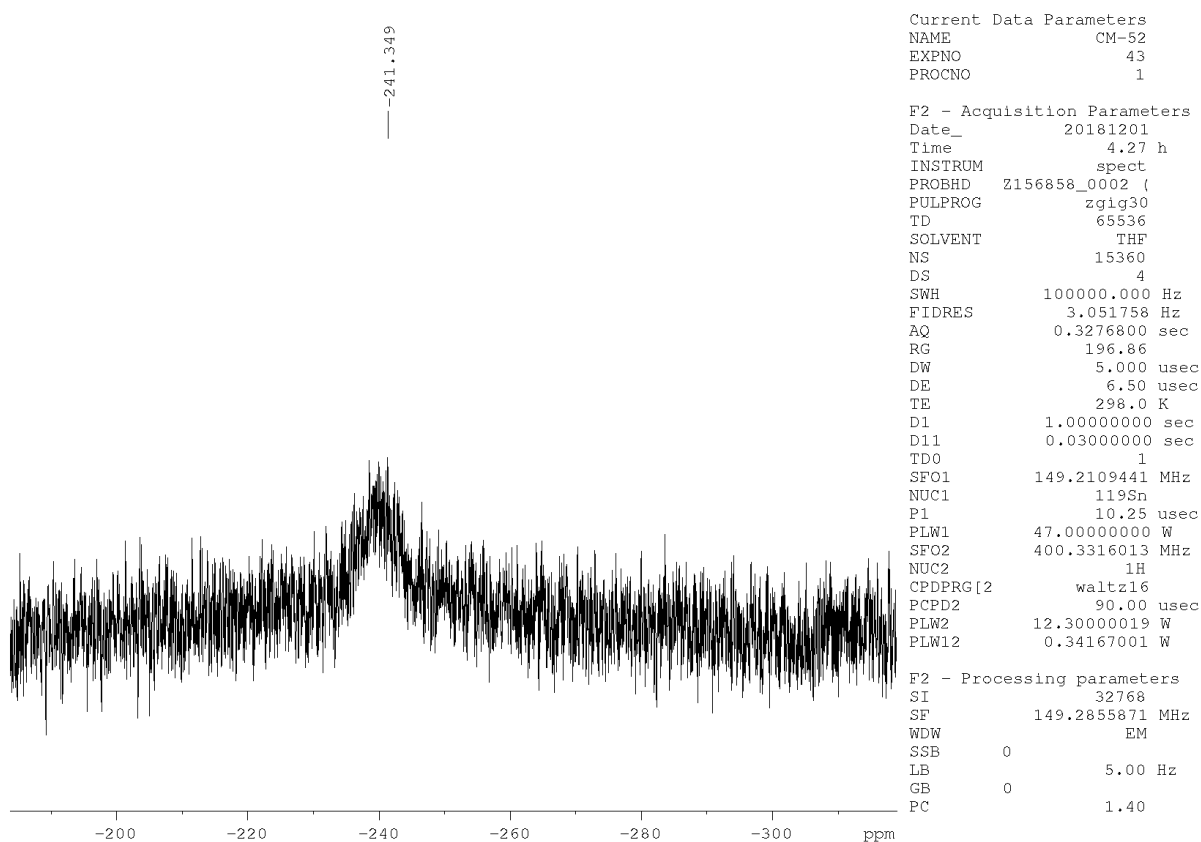

Figure S21.  $^{119}\text{Sn}$  spectrum of **5b** in THF- $d_8$ .

## 1.7 Synthesis of $Y_4Sn_2S_3$ (**6**)

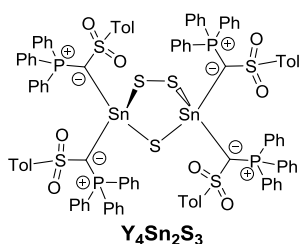

A glass vial was filled with elemental sulfur (2.4 mg, 0.075 mmol). A solution of  $Y_2Sn$  (51 mg, 0.052 mmol) in a mixture  $C_6D_6$  and THF in 4:1 (v/v, total 0.5 mL) was added to the vial and the reaction mixture was shaken for 15 minutes to completely dissolve all solids. The reaction mixture was filtered into another vial giving a clear solution, which was

kept in further vial filled with hexane to form **6** as pure pale-yellow solid (37 mg, 69.4% yield). Single crystals of **6** were grown from its solution in THF by vapour diffusion technique with hexane.

$^1H$  NMR (400.3 MHz,  $CD_2Cl_2$ ):  $\delta$  2.28-2.38 (br, m, 12H;  $CH_{3STol}$ ), 6.36-7.87 (br, m, 72H;  $CH_{PPh,STol}$ ).  $^{13}C\{^1H\}$  NMR (100.6 MHz,  $CD_2Cl_2$ ):  $\delta$  20.87-20.97 (br,  $CH_{3STol}$ ), 124.28-124.66 ( $CH_{STol,ortho}$ ), 125.19-125.56 ( $CH_{STol,meta}$ ), 126.24-127.15 (d,  $^1J_{PC} = 90.75$  Hz,  $C_{PPh,ipso}$ ), 126.86-128.09 (d,  $^1J_{PC} = 123.55$  Hz,  $C_{PPh,ipso}$ ), 127.69-128.39 (d,  $^1J_{PC} = 69.62$  Hz,  $C_{PPh,ipso}$ ), 127.44-127.57 (d,  $^3J_{PC} = 13.04$  Hz;  $CH_{PPh,meta}$ ), 127.89-128.02 (d,  $^3J_{PC} = 12.58$  Hz;  $CH_{PPh,meta}$ ), 128.57-128.69 (d,  $^3J_{PC} = 12.50$  Hz;  $CH_{PPh,meta}$ ), 131.12 (br, s,  $CH_{PPh,para}$ ), 131.53-131.56 (d,  $^4J_{PC} = 3.31$  Hz;  $CH_{PPh,para}$ ), 131.82-131.85 (d,  $^4J_{PC} = 3.07$  Hz;  $CH_{PPh,para}$ ), 132.47-132.50 (d,  $^4J_{PC} = 3.12$  Hz;  $CH_{PPh,para}$ ), 134.23-134.33 (d,  $^2J_{PC} = 10.27$  Hz;  $CH_{PPh,ortho}$ ), 135.18-135.28 (d,  $^2J_{PC} = 10.29$  Hz;  $CH_{PPh,ortho}$ ), 135.37-135.47 (d,  $^2J_{PC} = 10.13$  Hz;  $CH_{PPh,ortho}$ ), 135.58-135.68 (d,  $^2J_{PC} = 10.37$  Hz;  $CH_{PPh,ortho}$ ), 138.71-140.30 ( $C_{STol,para}$ ), 145.18-145.64 ( $C_{STol,ipso}$ ).  $^{31}P\{^1H\}$  NMR (162.05 MHz,  $CD_2Cl_2$ ): 13.29-15.24 (br). Anal. Calcd. for  $C_{104}H_{88}O_8P_4S_7Sn_2$ : C, 60.89; H, 4.32; S, 10.94. Found: C, 60.77; H, 4.47; S, 10.96.

Due to the low solubility and fluxional behaviour of **6** in solution,  $^{13}C$  NMR signals of the quaternary carbon atoms as well as  $^{119}Sn$  NMR signals could not be detected. The fluxional behaviour of **6** in solution results in broad signals for the aromatic protons, hence they were not able to be assigned in detail.

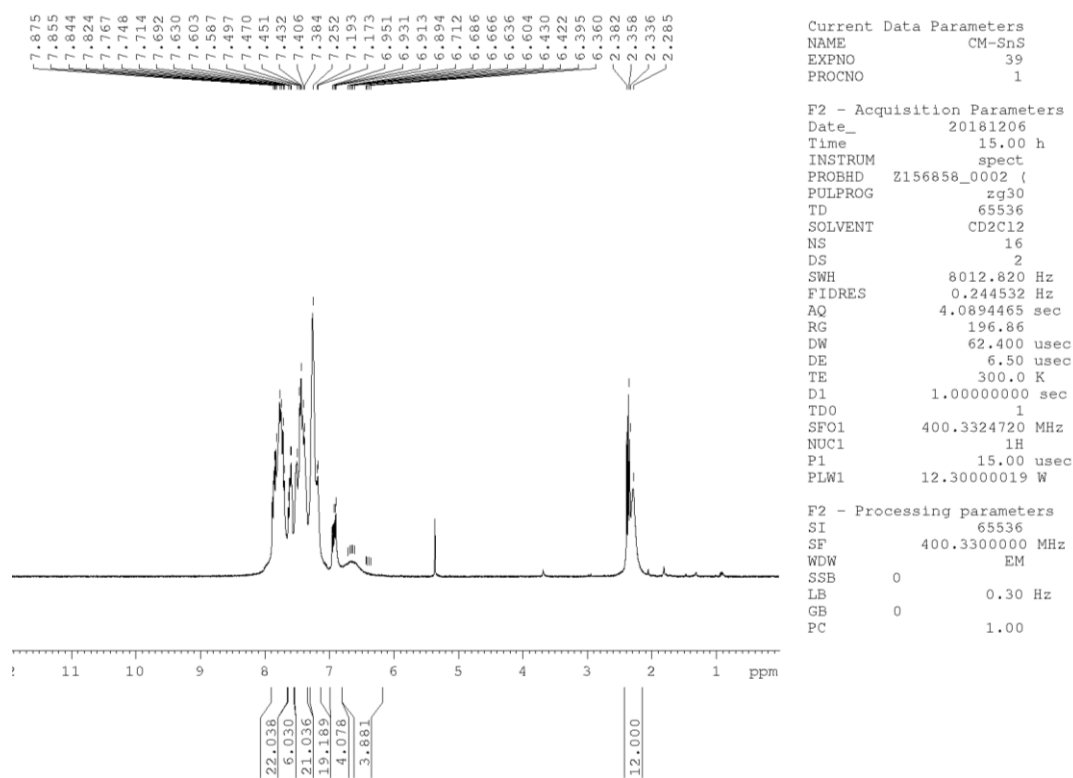Figure S22.  $^1\text{H}$  spectrum of **6** in  $\text{DCM-d}_2$ .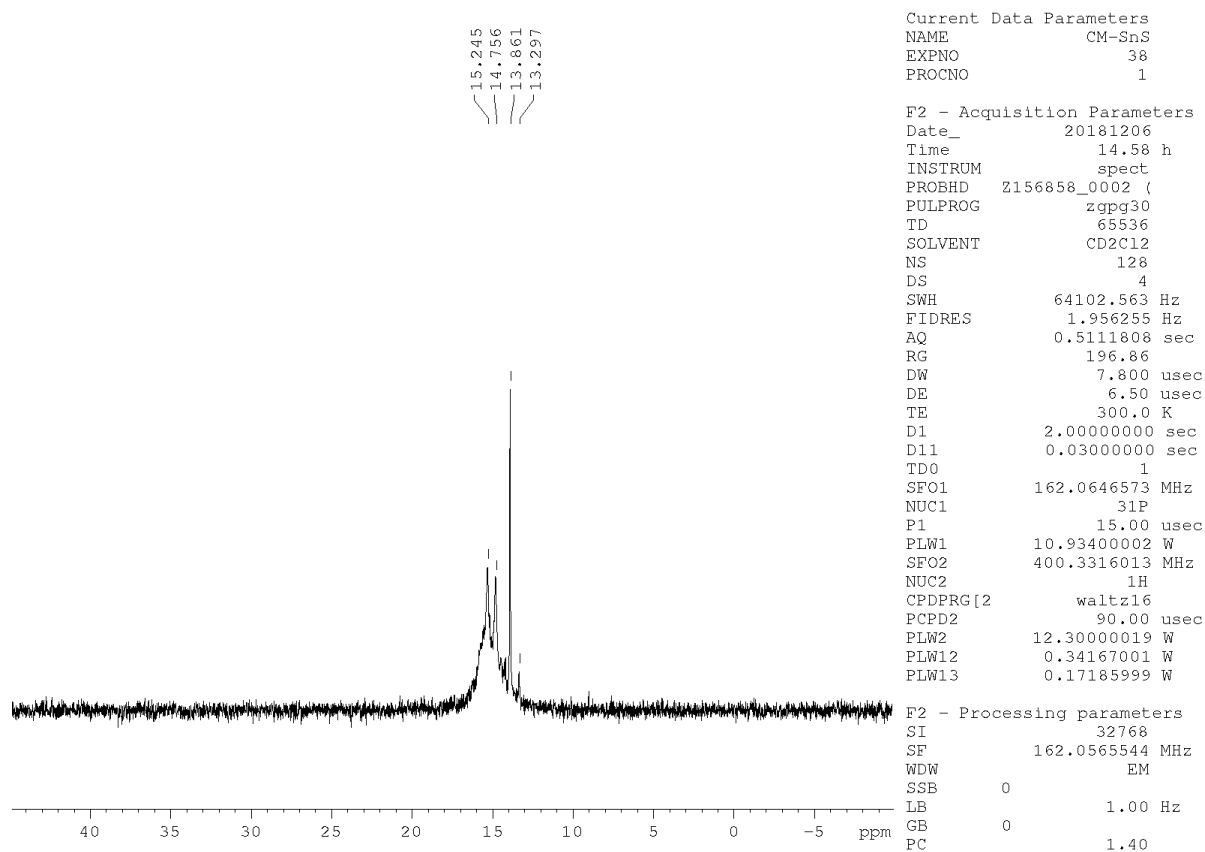Figure S23.  $^{31}\text{P}\{^1\text{H}\}$  spectrum of **6** in  $\text{DCM-d}_2$ .

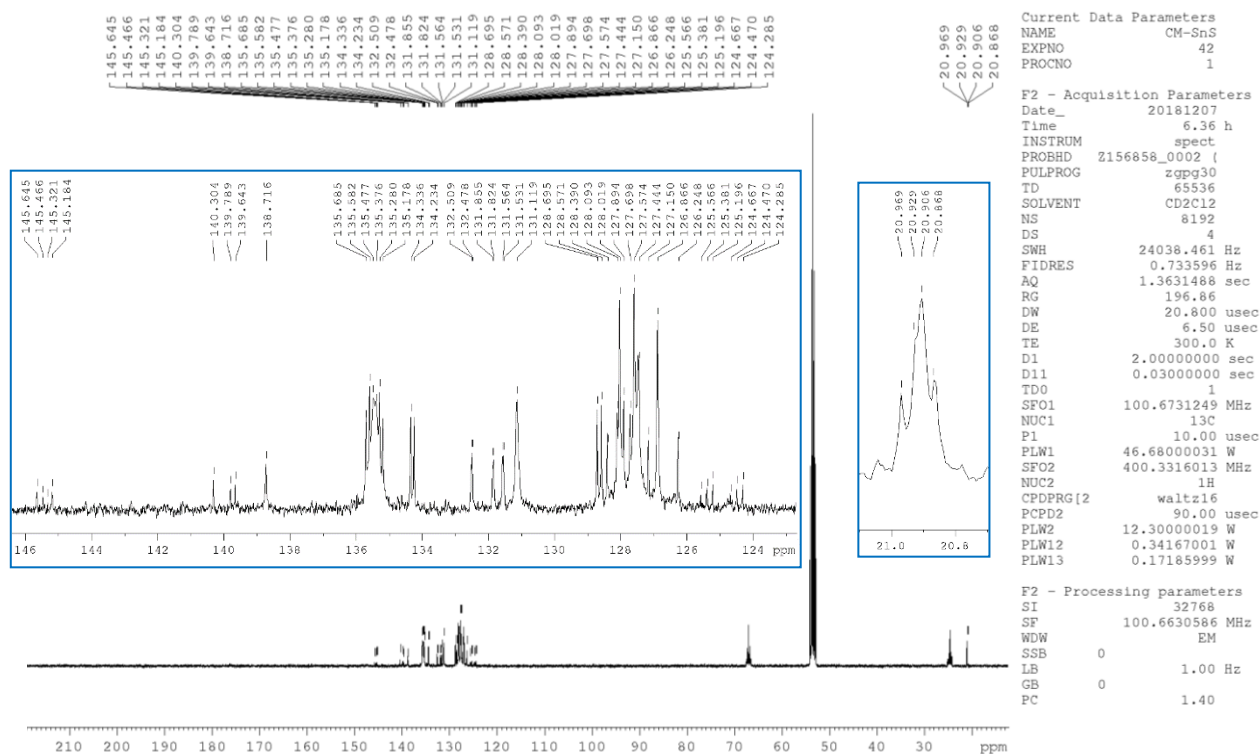

Figure S24.  $^{13}\text{C}\{^1\text{H}\}$  spectrum of **6** in  $\text{DCM-d}_2$ .

## 2. Crystal Structure Determination

### 2.1 General information

Data collection of all compounds was conducted either with Oxford SuperNova ( $\text{Y}_2\text{Ge}$ ,  $\text{Y}_2\text{Sn}$ , **4**, **5a**, **6**) or Oxford Synergy (**5b**). The structures were solved using direct methods, refined with the Shelx software package<sup>[2]</sup> and expanded using Fourier techniques. The crystals of all compounds were mounted in inert oil (perfluoropolyalkylether). Crystal structure determinations were affected at 100 K. Crystallographic data (including structure factors) have been deposited with the Cambridge Crystallographic Data Centre as supplementary publication no. CCDC-1901204-1901209. Copies of the data can be obtained free of charge on application to Cambridge Crystallographic Data Centre, 12 Union Road, Cambridge CB2 1EZ, UK; [fax: (+44) 1223-336-033; email: [deposit@ccdc.cam.ac.uk](mailto:deposit@ccdc.cam.ac.uk)].

**Table S1.** Data collection and structure refinement details for compounds **Y<sub>2</sub>Ge**, **Y<sub>2</sub>Sn** and **4**.

| Compound                              | Y <sub>2</sub> Ge                                                               | Y <sub>2</sub> Sn                                                               | 4                                                                                              |
|---------------------------------------|---------------------------------------------------------------------------------|---------------------------------------------------------------------------------|------------------------------------------------------------------------------------------------|
| CCDC No.                              | CCDC 1901208                                                                    | CCDC 1901204                                                                    | CCDC 1901207                                                                                   |
| Empirical formula                     | C <sub>58</sub> H <sub>50</sub> O <sub>4</sub> P <sub>2</sub> S <sub>2</sub> Ge | C <sub>52</sub> H <sub>44</sub> O <sub>4</sub> P <sub>2</sub> S <sub>2</sub> Sn | C <sub>146</sub> H <sub>132</sub> Ge <sub>4</sub> O <sub>8</sub> P <sub>4</sub> S <sub>4</sub> |
| Formula weight                        | 1009.63                                                                         | 977.62                                                                          | 2556.99                                                                                        |
| Temperature (K)                       | 100.4(3)                                                                        | 100.2(14)                                                                       | 100.6(8)                                                                                       |
| Wavelength                            | 1.54184 Å                                                                       | 1.54184 Å                                                                       | 1.54184 Å                                                                                      |
| Crystal system                        | Monoclinic                                                                      | triclinic                                                                       | triclinic                                                                                      |
| Space group                           | <i>P</i> 2 <sub>1</sub> / <i>c</i>                                              | <i>P</i> -1                                                                     | <i>P</i> -1                                                                                    |
| a (Å)                                 | 23.2312(2)                                                                      | 11.0750(3)                                                                      | 18.2582(8)                                                                                     |
| b (Å)                                 | 10.71684(11)                                                                    | 13.9752(5)                                                                      | 18.5515(8)                                                                                     |
| c (Å)                                 | 20.2615(2)                                                                      | 17.0539(7)                                                                      | 22.6058(8)                                                                                     |
| α (°)                                 | 90                                                                              | 68.027(3)                                                                       | 73.148(4)                                                                                      |
| β (°)                                 | 102.2324(11)                                                                    | 82.329(3)                                                                       | 68.776(4)                                                                                      |
| γ (°)                                 | 90                                                                              | 66.789(3)                                                                       | 60.938(5)                                                                                      |
| Volume (Å <sup>3</sup> )              | 4929.88(9)                                                                      | 2249.36(15)                                                                     | 6177.5(5)                                                                                      |
| Z                                     | 4                                                                               | 2                                                                               | 2                                                                                              |
| Density (calculated)                  | 1.360 Mg/m <sup>3</sup>                                                         | 1.443 Mg/m <sup>3</sup>                                                         | 1.375 Mg/m <sup>3</sup>                                                                        |
| Absorption coefficient                | 2.625 mm <sup>-1</sup>                                                          | 6.421 mm <sup>-1</sup>                                                          | 2.713 mm <sup>-1</sup>                                                                         |
| F(000)                                | 2096.0                                                                          | 1000.0                                                                          | 2648.0                                                                                         |
| Crystal dimensions (mm <sup>3</sup> ) | 0.263 × 0.192 × 0.116                                                           | 0.239 × 0.207 × 0.175                                                           | 0.606 × 0.196 × 0.141                                                                          |
| Theta range (°)                       | 3.894 to 74.413                                                                 | 3.678 to 74.34                                                                  | 3.23 to 75.516                                                                                 |
| Index ranges                          | -29 ≤ h ≤ 23,<br>-13 ≤ k ≤ 13,<br>-25 ≤ l ≤ 24                                  | -13 ≤ h ≤ 13,<br>-17 ≤ k ≤ 17,<br>-21 ≤ l ≤ 21                                  | -22 ≤ h ≤ 22,<br>-23 ≤ k ≤ 23,<br>-27 ≤ l ≤ 27                                                 |
| Reflections collected                 | 35925                                                                           | 16336                                                                           | 112522                                                                                         |
| Independent reflections               | 9932<br>[ <i>R</i> (int)= 0.0367]                                               | 8884<br>[ <i>R</i> (int) = 0.0206]                                              | 24767<br>[ <i>R</i> (int) = 0.0551]                                                            |
| Data / restraints / parameters        | 9932/0/606                                                                      | 8884/0/552                                                                      | 24767/0/1499                                                                                   |
| Goodness-of-fit on F <sup>2</sup>     | 1.042                                                                           | 1.055                                                                           | 1.038                                                                                          |
| Final R indices [I > 2σ(I)]           | <i>R</i> <sub>1</sub> = 0.0341, <i>wR</i> <sub>2</sub> = 0.0888                 | <i>R</i> <sub>1</sub> = 0.0252, <i>wR</i> <sub>2</sub> = 0.0657                 | <i>R</i> <sub>1</sub> = 0.0446, <i>wR</i> <sub>2</sub> = 0.1099                                |
| R indices (all data)                  | <i>R</i> <sub>1</sub> = 0.0388, <i>wR</i> <sub>2</sub> = 0.0933                 | <i>R</i> <sub>1</sub> = 0.0261, <i>wR</i> <sub>2</sub> = 0.0664                 | <i>R</i> <sub>1</sub> = 0.0613, <i>wR</i> <sub>2</sub> = 0.1212                                |
| Largest diff. peak and hole           | 0.49 and -0.40 e.Å <sup>-3</sup>                                                | 0.35 and -0.68 e.Å <sup>-3</sup>                                                | 1.05 and -0.82 e.Å <sup>-3</sup>                                                               |

**Table S2.** Data collection and structure refinement details for compounds **5a**, **5b** and **6**.

| Compound                              | 5a                                                                              | 5b                                                                              | 6                                                                                               |
|---------------------------------------|---------------------------------------------------------------------------------|---------------------------------------------------------------------------------|-------------------------------------------------------------------------------------------------|
| CCDC No.                              | CCDC 1901205                                                                    | 1901209                                                                         | 1901206                                                                                         |
| Empirical formula                     | C <sub>75</sub> H <sub>73</sub> O <sub>6</sub> P <sub>2</sub> S <sub>2</sub> Ge | C <sub>75</sub> H <sub>73</sub> O <sub>6</sub> P <sub>2</sub> S <sub>2</sub> Sn | C <sub>112</sub> H <sub>104</sub> O <sub>10</sub> P <sub>4</sub> S <sub>7</sub> Sn <sub>2</sub> |
| Formula weight                        | 1268.98                                                                         | 1315.08                                                                         | 2195.63                                                                                         |
| Temperature                           | 100(2) K                                                                        | 100(2) K                                                                        | 101.2(10)                                                                                       |
| Wavelength                            | 1.54184 Å                                                                       | 1.54184 Å                                                                       | 1.54184 Å                                                                                       |
| Crystal system                        | Triclinic                                                                       | Triclinic                                                                       | Monoclinic                                                                                      |
| Space group                           | <i>P</i> -1                                                                     | <i>P</i> -1                                                                     | <i>C</i> 2/ <i>c</i>                                                                            |
| a (Å)                                 | 10.8073(5)                                                                      | 10.6912(3)                                                                      | 30.8747(7)                                                                                      |
| b (Å)                                 | 15.0932(9)                                                                      | 15.2028(3)                                                                      | 11.0570(2)                                                                                      |
| c (Å)                                 | 21.9324(13)                                                                     | 22.2336(4)                                                                      | 29.3124(6)                                                                                      |
| α (°)                                 | 86.787(5)                                                                       | 87.354(2)                                                                       | 90                                                                                              |
| β (°)                                 | 77.816(5)                                                                       | 78.738(2)                                                                       | 93.451(2)                                                                                       |
| γ (°)                                 | 77.593(5)                                                                       | 78.000(2)                                                                       | 90                                                                                              |
| Volume (Å <sup>3</sup> )              | 3415.1(3)                                                                       | 3466.67(14)                                                                     | 9988.6(4)                                                                                       |
| Z                                     | 2                                                                               | 2                                                                               | 4                                                                                               |
| Density (calculated)                  | 1.234 Mg/m <sup>3</sup>                                                         | 1.260 Mg/m <sup>3</sup>                                                         | 1.460 Mg/m <sup>3</sup>                                                                         |
| Absorption coefficient                | 2.021 mm <sup>-1</sup>                                                          | 4.322 mm <sup>-1</sup>                                                          | 6.435 mm <sup>-1</sup>                                                                          |
| F(000)                                | 1330                                                                            | 1366                                                                            | 4512.0                                                                                          |
| Crystal dimensions (mm <sup>3</sup> ) | 0.448 × 0.097 × 0.056                                                           | 0.245 × 0.053 × 0.013                                                           | 0.169 × 0.107 × 0.037                                                                           |
| Theta range (°)                       | 3.620 to 69.997                                                                 | 2.972 to 67.071                                                                 | 8.08 to 135.992                                                                                 |
| Index ranges                          | -13 ≤ h ≤ 13,<br>-18 ≤ k ≤ 18,<br>-24 ≤ l ≤ 26                                  | -12 ≤ h ≤ 12,<br>-18 ≤ k ≤ 18,<br>-26 ≤ l ≤ 20                                  | -36 ≤ h ≤ 37,<br>-13 ≤ k ≤ 13,<br>-35 ≤ l ≤ 34                                                  |
| Reflections collected                 | 23890                                                                           | 36156                                                                           | 37966                                                                                           |
| Independent reflections               | 12887<br>[ <i>R</i> (int) = 0.0625]                                             | 12115<br>[ <i>R</i> (int) = 0.0523]                                             | 9108<br>[ <i>R</i> (int) = 0.0668]                                                              |
| Data / restraints / parameters        | 12887 / 0 / 784                                                                 | 12115 / 0 / 786                                                                 | 9108/16/597                                                                                     |
| Goodness-of-fit on F <sup>2</sup>     | 1.002                                                                           | 1.043                                                                           | 1.250                                                                                           |
| Final R indices [I > 2σ(I)]           | <i>R</i> <sub>1</sub> = 0.0543,<br><i>wR</i> <sub>2</sub> = 0.1302              | <i>R</i> <sub>1</sub> = 0.0520,<br><i>wR</i> <sub>2</sub> = 0.1334              | <i>R</i> <sub>1</sub> = 0.0819,<br><i>wR</i> <sub>2</sub> = 0.2189                              |
| R indices (all data)                  | <i>R</i> <sub>1</sub> = 0.0773,<br><i>wR</i> <sub>2</sub> = 0.1472              | <i>R</i> <sub>1</sub> = 0.0577,<br><i>wR</i> <sub>2</sub> = 0.1375              | <i>R</i> <sub>1</sub> = 0.0879,<br><i>wR</i> <sub>2</sub> = 0.2217                              |
| Largest diff. peak and hole           | 0.909 and -0.719 e.Å <sup>-3</sup><br>3                                         | 2.138 and -1.717 e.Å <sup>-3</sup><br>3                                         | 3.44 and -1.15 e.Å <sup>-3</sup>                                                                |

## 2.2 Crystal Structure of Y<sub>2</sub>Ge

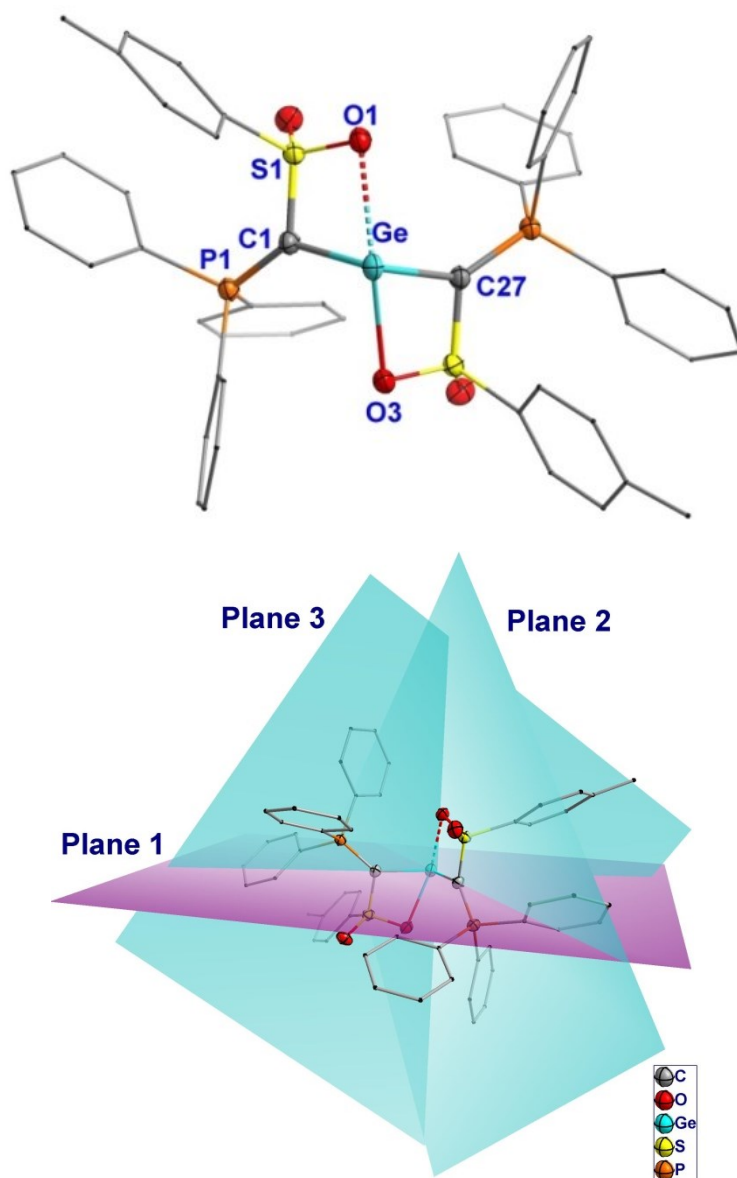

**Figure S25.** (top) X-Ray structure of Y<sub>2</sub>Ge. (Bottom) Plane passing through C1-Ge-C27 (Plane 1) and planes passing through S1-C1-P1 (Plane 2) and S2-C27-P2 (Plane 3). Dihedral angles (°): Plane 1-Plane 2, 89.64(9); Plane 1-Plane 3, 88.94(8).

**Table S3.** Atomic Coordinates ( $\times 10^4$ ) and Equivalent Isotropic Displacement Parameters ( $\text{\AA}^2 \times 10^3$ ) for Y<sub>2</sub>Ge.  $U_{eq}$  is defined as 1/3 of the trace of the orthogonalised  $U_{ij}$  tensor.

| Atom | x         | y          | z         | U(eq)   |
|------|-----------|------------|-----------|---------|
| C41  | 2588.5(8) | 5913.9(16) | 5072.5(9) | 23.6(3) |
| C40  | 2532.5(7) | 5308.3(16) | 4458.2(8) | 20.3(3) |
| C10  | 3052.8(7) | 4632.2(16) | 774.0(9)  | 21.6(3) |
| O3   | 3259.8(5) | 5629.1(12) | 3647.8(6) | 24.8(3) |
| C11  | 3279.9(8) | 3463.5(17) | 992.6(9)  | 26.0(4) |
| C60  | 774.8(8)  | 8040.1(17) | 2472.7(9) | 25.6(3) |

|      |            |             |            |          |
|------|------------|-------------|------------|----------|
| C42  | 2455.9(8)  | 5274.5(17)  | 5618.3(9)  | 25.0(3)  |
| C31  | 5036.3(9)  | 6671(2)     | 3924.0(11) | 41.8(5)  |
| C30  | 4632.6(8)  | 7093(2)     | 3359(1)    | 32.4(4)  |
| C54  | 1351.2(8)  | 3463.3(16)  | 2465.7(9)  | 23.5(3)  |
| C53  | 1126.8(7)  | 4671.8(16)  | 2374.9(8)  | 20.8(3)  |
| C52  | 885.6(8)   | 5046.8(17)  | 3816.0(9)  | 25.2(3)  |
| C51  | 642.7(8)   | 5137.0(19)  | 4386.7(10) | 28.8(4)  |
| C32  | 5101.9(9)  | 5411(2)     | 4056.3(10) | 40.4(5)  |
| C1   | 3188.0(7)  | 5754.5(16)  | 2070.4(8)  | 20.3(3)  |
| Ge1  | 2824.5(2)  | 4608.4(2)   | 2671.5(2)  | 19.33(7) |
| O2   | 2518.8(6)  | 6675.9(11)  | 951.9(6)   | 25.7(3)  |
| S1   | 2726.4(2)  | 5555.0(4)   | 1330.2(2)  | 18.66(9) |
| P1   | 3766.1(2)  | 6743.8(4)   | 2186.1(2)  | 19.40(9) |
| C12  | 3507.8(8)  | 2712.5(18)  | 556.9(10)  | 29.1(4)  |
| C18  | 3916.3(8)  | 7470(2)     | 912.8(9)   | 30.6(4)  |
| C24  | 3099.3(8)  | 8613.5(17)  | 2577.0(9)  | 26.9(4)  |
| C49  | 1008.8(9)  | 7229.0(18)  | 4572.4(10) | 29.6(4)  |
| C48  | 1253.5(8)  | 7144.2(17)  | 4006.1(9)  | 26.2(4)  |
| C34  | 4367.2(8)  | 4962.6(19)  | 3060.7(10) | 28.1(4)  |
| C59  | 1256.9(7)  | 7331.1(15)  | 2382.5(8)  | 20.3(3)  |
| C46  | 2349.9(8)  | 4071.6(16)  | 4387.9(9)  | 24.5(3)  |
| C58  | 593.3(8)   | 4884.1(17)  | 1924.9(9)  | 24.5(3)  |
| C47  | 1182.7(7)  | 6056.5(16)  | 3617.9(8)  | 21.2(3)  |
| C0AA | 3818.1(11) | 10565.7(19) | 2343.4(12) | 38.6(5)  |
| C23  | 3597.7(8)  | 8365.7(16)  | 2326.7(9)  | 23.6(3)  |
| C28  | 3960.0(9)  | 9345.3(18)  | 2208.7(11) | 31.8(4)  |
| C29  | 4296.4(7)  | 6238.0(17)  | 2926.1(9)  | 22.8(3)  |
| C33  | 4769.2(9)  | 4551(2)     | 3626.9(11) | 34.2(4)  |
| C44  | 2046.4(10) | 3395.8(18)  | 6118.9(10) | 32.9(4)  |
| C26  | 3323.2(11) | 10815.1(19) | 2596.7(11) | 38.0(5)  |
| C13  | 3530.7(8)  | 3115.0(19)  | -94.4(10)  | 28.9(4)  |
| C50  | 696.2(8)   | 6229.5(19)  | 4754.5(9)  | 28.7(4)  |
| C21  | 4851.7(11) | 5856(2)     | 913.8(13)  | 43.2(5)  |
| C27  | 2237.1(7)  | 5683.4(15)  | 3044.4(8)  | 19.8(3)  |
| P2   | 1504.3(2)  | 5943.4(4)   | 2875.9(2)  | 18.04(9) |
| O4   | 2694.1(6)  | 7440.7(11)  | 3936.7(6)  | 27.0(3)  |
| S2   | 2688.6(2)  | 6134.8(4)   | 3754.2(2)  | 19.39(9) |
| O1   | 2265.2(5)  | 4753.7(11)  | 1514.7(6)  | 23.0(2)  |
| C43  | 2246.3(8)  | 4050.4(17)  | 5550.4(9)  | 24.6(3)  |
| C45  | 2200.8(8)  | 3457.8(16)  | 4928.7(9)  | 25.5(3)  |
| C55  | 1040.8(8)  | 2478.6(17)  | 2112.6(9)  | 25.5(3)  |
| C56  | 505.5(8)   | 2691.6(17)  | 1668.1(9)  | 27.0(4)  |
| C57  | 283.0(8)   | 3895.4(17)  | 1572.1(9)  | 27.3(4)  |
| C22  | 4609.7(9)  | 5941.6(18)  | 1483.1(11) | 32.4(4)  |
| C25  | 2963.9(10) | 9834.4(19)  | 2716.0(11) | 34.3(4)  |
| C17  | 4137.7(8)  | 6748.7(17)  | 1482.6(9)  | 25.0(3)  |
| C20  | 4621.6(11) | 6554(2)     | 346.0(11)  | 43.2(5)  |
| C15  | 3313.2(8)  | 4292.8(19)  | -294.6(9)  | 29.5(4)  |



|     |            |            |             |         |
|-----|------------|------------|-------------|---------|
| C19 | 4157.1(10) | 7364(2)    | 341.3(10)   | 37.8(5) |
| C62 | 867.5(8)   | 9324.0(17) | 1530.8(10)  | 27.2(4) |
| C61 | 587.2(8)   | 9044.7(17) | 2051.5(10)  | 28.1(4) |
| C16 | 3069.5(8)  | 5051.3(17) | 131.1(9)    | 25.2(3) |
| C14 | 3779.0(9)  | 2277(2)    | -564.5(11)  | 37.2(5) |
| C63 | 1341.3(8)  | 8613.5(18) | 1434.2(9)   | 28.0(4) |
| C70 | 1087.5(12) | 4272(2)    | 111.0(13)   | 46.9(6) |
| C71 | 587.8(12)  | 3592(2)    | -127.9(12)  | 44.9(5) |
| C72 | 437.2(11)  | 3248(2)    | -792.6(12)  | 41.9(5) |
| C73 | 783.6(12)  | 3575(2)    | -1235.7(12) | 46.4(6) |
| C74 | 1289.3(13) | 4266(3)    | -1007.6(17) | 59.3(8) |
| C75 | 1440.8(11) | 4620(2)    | -318.8(17)  | 55.4(7) |
| C64 | 1541.0(8)  | 7624.1(17) | 1864.5(9)   | 24.7(3) |

**Table S4.** Anisotropic displacement parameters ( $\text{\AA}^2 \times 10^3$ ) for  $\text{Y}_2\text{Ge}$ . The anisotropic displacement factor exponent takes the form:  $-2p^2[h^2 a^{*2}U^{11} + \dots + 2 h k a^* b^* U^{12}]$

| Atom | U <sup>11</sup> | U <sup>22</sup> | U <sup>33</sup> | U <sup>23</sup> | U <sup>13</sup> | U <sup>12</sup> |
|------|-----------------|-----------------|-----------------|-----------------|-----------------|-----------------|
| C41  | 22.1(8)         | 23.5(8)         | 25.2(8)         | -1.2(6)         | 5.0(6)          | -3.0(6)         |
| C40  | 18.7(7)         | 22.2(8)         | 20.7(8)         | 0.8(6)          | 5.8(6)          | 0.1(6)          |
| C10  | 18.0(8)         | 24.5(8)         | 22.6(8)         | -3.9(6)         | 4.4(6)          | -2.7(6)         |
| O3   | 17.6(6)         | 33.8(7)         | 23.4(6)         | 2.1(5)          | 4.9(5)          | -0.8(5)         |
| C11  | 24.8(8)         | 29.0(9)         | 25.2(8)         | -0.7(7)         | 7.6(7)          | 0.4(7)          |
| C60  | 24.6(8)         | 25.5(8)         | 28.1(8)         | -0.8(7)         | 8.9(7)          | 2.5(7)          |
| C42  | 27.8(9)         | 26.6(9)         | 22.0(8)         | -1.2(6)         | 8.2(7)          | 0.9(7)          |
| C31  | 28.1(10)        | 56.3(14)        | 35.7(11)        | -18(1)          | -5.3(8)         | 11.8(9)         |
| C30  | 24.8(9)         | 35.6(10)        | 34.7(10)        | -10.3(8)        | 1.5(7)          | 5.1(8)          |
| C54  | 21.4(8)         | 23.8(8)         | 26.0(8)         | -1.8(6)         | 6.8(6)          | 0.1(7)          |
| C53  | 20.5(8)         | 22.5(8)         | 21.1(8)         | -2.4(6)         | 8.3(6)          | -4.1(6)         |
| C52  | 24.0(8)         | 25.1(8)         | 27.7(9)         | -1.0(7)         | 8.1(7)          | -0.9(7)         |
| C51  | 25.3(9)         | 32.0(9)         | 30.6(9)         | 4.2(7)          | 9.4(7)          | -2.4(7)         |
| C32  | 28.4(10)        | 64.5(15)        | 26.3(10)        | 0.2(9)          | 1.4(8)          | 18.1(10)        |
| C1   | 20.4(8)         | 21.2(7)         | 20.0(7)         | -0.4(6)         | 6.2(6)          | -4.1(6)         |
| Ge1  | 18.78(11)       | 17.32(10)       | 23.15(11)       | 1.11(7)         | 7.28(8)         | 0.82(7)         |
| O2   | 28.2(6)         | 23.0(6)         | 25.9(6)         | 3.1(5)          | 5.9(5)          | 4.7(5)          |
| S1   | 17.70(18)       | 19.24(18)       | 19.54(18)       | -0.41(13)       | 5.03(14)        | -0.33(14)       |
| P1   | 17.17(19)       | 20.4(2)         | 21.25(19)       | -0.74(14)       | 5.47(15)        | -1.82(14)       |
| C12  | 23.9(8)         | 28.1(9)         | 35.9(10)        | -5.3(7)         | 7.5(7)          | 1.9(7)          |
| C18  | 27.2(9)         | 38.2(10)        | 26.5(9)         | -0.1(7)         | 6.2(7)          | -10.7(8)        |
| C24  | 29.9(9)         | 24.5(8)         | 26.6(8)         | 1.8(7)          | 6.6(7)          | 0.4(7)          |
| C49  | 32.5(9)         | 30.0(9)         | 27.2(9)         | -4.8(7)         | 8.6(7)          | 1.6(8)          |
| C48  | 27.9(9)         | 24.2(8)         | 27.8(9)         | -1.3(7)         | 8.8(7)          | -1.2(7)         |
| C34  | 20.0(8)         | 33.5(9)         | 31.8(9)         | 4.5(8)          | 8.0(7)          | -0.2(7)         |
| C59  | 18.5(7)         | 18.5(7)         | 22.8(8)         | -0.4(6)         | 2.0(6)          | -1.4(6)         |
| C46  | 27.3(9)         | 23.3(8)         | 22.4(8)         | -2.1(6)         | 4.7(7)          | 0.4(7)          |
| C58  | 21.4(8)         | 24.6(8)         | 27.5(8)         | -2.4(7)         | 4.8(7)          | -1.0(7)         |

|      |           |           |           |           |          |           |
|------|-----------|-----------|-----------|-----------|----------|-----------|
| C47  | 18.3(7)   | 24.3(8)   | 21.3(8)   | 1.3(6)    | 4.8(6)   | 2.2(6)    |
| C0AA | 47.5(12)  | 23.4(9)   | 43.2(12)  | 0.8(8)    | 6.2(9)   | -8.1(8)   |
| C23  | 25.1(8)   | 21.3(8)   | 23.7(8)   | 0.7(6)    | 3.7(6)   | -0.9(7)   |
| C28  | 30.8(10)  | 26.9(9)   | 38(1)     | -1.4(8)   | 8.5(8)   | -5.7(8)   |
| C29  | 17.1(7)   | 29.5(9)   | 23.1(8)   | -0.4(6)   | 7.4(6)   | 0.9(6)    |
| C33  | 23.8(9)   | 45.3(12)  | 36(1)     | 12.6(8)   | 12.0(8)  | 9.8(8)    |
| C44  | 40.9(11)  | 28.2(9)   | 33.3(10)  | 5.4(8)    | 16.1(8)  | 1.0(8)    |
| C26  | 52.0(13)  | 23.1(9)   | 36.5(10)  | -3.1(8)   | 4.2(9)   | 5.9(9)    |
| C13  | 20.4(8)   | 35.9(10)  | 31.9(9)   | -12.8(8)  | 9.0(7)   | -4.8(7)   |
| C50  | 25.2(9)   | 40(1)     | 22.8(8)   | 2.3(7)    | 9.3(7)   | 5.6(7)    |
| C21  | 49.8(13)  | 38.0(11)  | 51.6(13)  | -7.4(10)  | 33.0(11) | -3.1(10)  |
| C27  | 17.8(7)   | 21.4(7)   | 21.3(7)   | -1.2(6)   | 6.5(6)   | -0.1(6)   |
| P2   | 16.69(19) | 17.56(19) | 20.53(19) | -0.88(14) | 5.42(15) | -0.31(14) |
| O4   | 35.5(7)   | 20.0(6)   | 26.1(6)   | -1.8(5)   | 8.1(5)   | -6.9(5)   |
| S2   | 18.70(18) | 20.21(19) | 19.51(18) | -0.24(13) | 4.61(14) | -2.69(14) |
| O1   | 19.8(6)   | 23.8(6)   | 26.7(6)   | -2.6(5)   | 7.6(5)   | -2.6(5)   |
| C43  | 23.1(8)   | 25.2(8)   | 26.8(8)   | 3.7(7)    | 8.6(7)   | 4.4(7)    |
| C45  | 27.8(9)   | 19.4(8)   | 29.9(9)   | 2.0(7)    | 7.5(7)   | -1.0(7)   |
| C55  | 27.3(9)   | 21.0(8)   | 30.4(9)   | -3.7(7)   | 11.1(7)  | -1.5(7)   |
| C56  | 26.1(9)   | 27.4(9)   | 28.8(9)   | -7.7(7)   | 8.5(7)   | -7.7(7)   |
| C57  | 21.3(8)   | 30.8(9)   | 28.9(9)   | -4.0(7)   | 3.3(7)   | -3.8(7)   |
| C22  | 35.5(10)  | 28.3(9)   | 38.5(10)  | -1.2(8)   | 19.1(8)  | -1.5(8)   |
| C25  | 40.5(11)  | 29.7(10)  | 34.4(10)  | -0.4(8)   | 11.7(8)  | 6.8(8)    |
| C17  | 24.4(8)   | 27.0(8)   | 25.5(8)   | -3.4(7)   | 9.8(7)   | -7.9(7)   |
| C20  | 54.8(14)  | 45.6(12)  | 37.4(11)  | -14.3(9)  | 28.3(10) | -22.2(11) |
| C15  | 28.1(9)   | 38.6(10)  | 23.5(8)   | -4.9(7)   | 9.4(7)   | -6.7(8)   |
| C19  | 41.7(11)  | 47.4(12)  | 24.9(9)   | -1.5(8)   | 8.1(8)   | -21.6(10) |
| C62  | 29.0(9)   | 20.6(8)   | 29.4(9)   | 2.4(7)    | 0.7(7)   | 0.4(7)    |
| C61  | 28.2(9)   | 24.3(9)   | 31.5(9)   | -2.0(7)   | 5.5(7)   | 6.8(7)    |
| C16  | 24.6(8)   | 27.4(9)   | 23.9(8)   | -1.0(7)   | 5.6(7)   | -3.1(7)   |
| C14  | 28.7(10)  | 46.8(12)  | 38.0(11)  | -16.0(9)  | 11.7(8)  | -1.1(9)   |
| C63  | 28.3(9)   | 28.4(9)   | 27.7(9)   | 6.1(7)    | 6.7(7)   | -0.1(7)   |
| C70  | 53.4(14)  | 37.5(11)  | 43.0(12)  | -2.4(9)   | -4.9(11) | 8.8(10)   |
| C71  | 55.6(14)  | 41.3(12)  | 36.1(11)  | 4.2(9)    | 6(1)     | 0.5(10)   |
| C72  | 53.2(13)  | 28.5(10)  | 38.9(11)  | 3.5(8)    | -1.8(10) | 0.1(9)    |
| C73  | 60.4(15)  | 39.5(12)  | 38.8(12)  | 1.0(9)    | 9.6(10)  | 19.7(11)  |
| C74  | 51.0(15)  | 52.0(15)  | 82(2)     | 23.9(14)  | 31.4(14) | 27.3(13)  |
| C75  | 34.4(12)  | 37.6(12)  | 87(2)     | 4.9(12)   | -4.4(13) | 10.2(9)   |
| C64  | 21.3(8)   | 25.8(8)   | 27.8(8)   | 0.4(7)    | 7.0(7)   | 2.3(7)    |

---

2.3 Crystal Structure of  $Y_2Sn$ 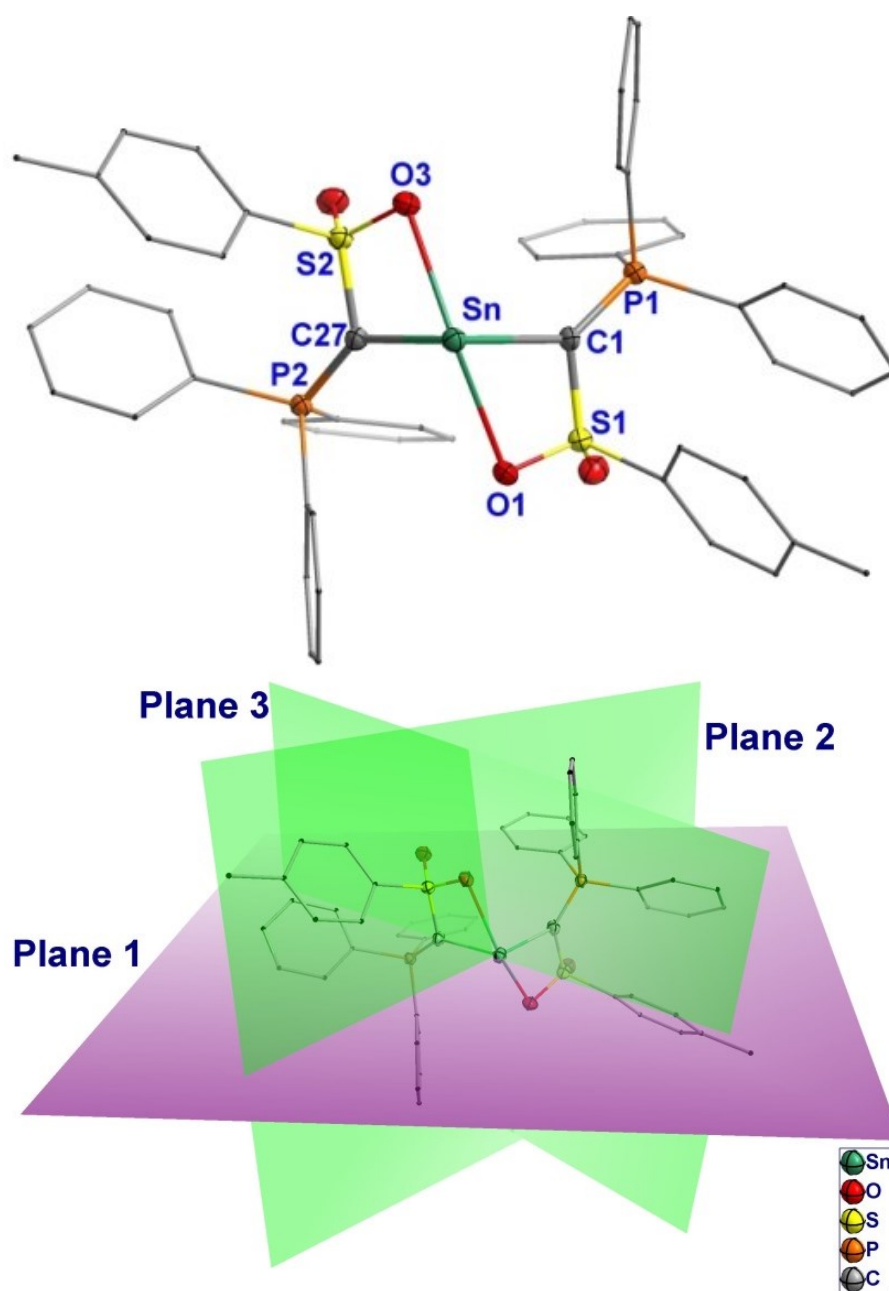

**Figure S26.** (top) X-Ray structure of  $Y_2Sn$ . (bottom) Plane passing through C1-Sn-C27 (Plane 1) and planes passing through S1-C1-P1 (Plane 2) and S2-C27-P2 (Plane 3). Dihedral angles ( $^\circ$ ): Plane 1-Plane 2, 88.92(6); Plane 1-Plane 3, 86.20(7).

**Table S5.** Atomic Coordinates ( $\times 10^4$ ) and Equivalent Isotropic Displacement Parameters ( $\text{\AA}^2 \times 10^3$ ) for  $Y_2Sn$ .  $U_{eq}$  is defined as 1/3 of the trace of the orthogonalised  $U_{ij}$  tensor.

| Atom | x          | y          | z         | U(eq)    |
|------|------------|------------|-----------|----------|
| Sn1  | 8913.7(2)  | -0.7(2)    | 1528.0(2) | 17.17(5) |
| O1   | 6634.9(14) | 1105.5(12) | 1083.2(9) | 23.6(3)  |
| S1   | 6841.5(4)  | 2175.2(4)  | 652.6(3)  | 18.00(9) |

|      |             |             |             |          |
|------|-------------|-------------|-------------|----------|
| P1   | 9113.6(4)   | 2777.8(4)   | 550.0(3)    | 15.71(9) |
| C1   | 8429.2(18)  | 1808.8(15)  | 832.8(12)   | 17.9(4)  |
| C41  | 10491(2)    | -2618.8(18) | 3636.1(14)  | 26.0(4)  |
| C40  | 10753.0(19) | -1825.3(16) | 3809.2(13)  | 19.7(4)  |
| C12  | 5055(2)     | 3678.0(18)  | -1648.5(14) | 27.0(4)  |
| C11  | 5325(2)     | 3404.8(18)  | -802.5(14)  | 26.4(4)  |
| C10  | 6491.0(19)  | 2545.4(16)  | -435.8(12)  | 18.4(4)  |
| O4   | 10114.5(14) | 214.6(12)   | 3682.1(10)  | 24.8(3)  |
| C13  | 5934(2)     | 3119.9(17)  | -2136.8(13) | 23.3(4)  |
| C42  | 11036(2)    | -3733.4(18) | 4147.4(14)  | 28.2(5)  |
| C43  | 11852(2)    | -4070.6(18) | 4833.9(13)  | 25.1(4)  |
| C27  | 8492.0(18)  | -104.0(16)  | 2871.6(12)  | 17.5(4)  |
| P2   | 7225.9(4)   | -31.1(4)    | 3560.3(3)   | 15.67(9) |
| S2   | 9989.1(4)   | -379.3(4)   | 3177.8(3)   | 17.74(9) |
| O3   | 10732.7(13) | -240.2(12)  | 2375.9(9)   | 22.2(3)  |
| O2   | 5925.4(14)  | 3102.0(13)  | 885.6(9)    | 25.6(3)  |
| C16  | 7371.8(19)  | 1968.3(16)  | -911.3(13)  | 21.1(4)  |
| C15  | 7093(2)     | 2252.9(18)  | -1756.3(14) | 24.3(4)  |
| C14  | 5663(3)     | 3451(2)     | -3065.5(15) | 34.3(5)  |
| C17  | 8572.4(19)  | 3790.2(16)  | -498.1(12)  | 18.3(4)  |
| C18  | 7408(2)     | 4723.8(18)  | -612.6(14)  | 25.5(4)  |
| C20  | 7595(2)     | 5212(2)     | -2117.3(14) | 29.8(5)  |
| C19  | 6931(2)     | 5438.7(19)  | -1423.5(15) | 30.1(5)  |
| C21  | 8734(2)     | 4275(2)     | -2007.9(14) | 29.4(5)  |
| C22  | 9224(2)     | 3566.5(17)  | -1202.3(13) | 23.0(4)  |
| C23  | 10886.0(18) | 2120.6(16)  | 526.2(12)   | 18.2(4)  |
| C24  | 11698(2)    | 2520.3(17)  | 768.5(13)   | 22.3(4)  |
| C25  | 13053(2)    | 2067.9(19)  | 674.1(15)   | 28.7(5)  |
| C26  | 13594(2)    | 1228(2)     | 340.6(17)   | 32.6(5)  |
| C0AA | 12789(2)    | 821(2)      | 105.3(17)   | 32.1(5)  |
| C33  | 8546(2)     | 5198(2)     | 1525.6(18)  | 37.1(6)  |
| C32  | 8442(2)     | 4643(2)     | 2381.1(18)  | 41.1(6)  |
| C31  | 8514(2)     | 3554(2)     | 2667.1(15)  | 36.7(6)  |
| C30  | 8688(2)     | 3009.5(19)  | 2104.0(13)  | 25.9(4)  |
| C29  | 8806.4(19)  | 3561.1(17)  | 1245.8(13)  | 21.0(4)  |
| C28  | 11441(2)    | 1261.7(18)  | 207.0(14)   | 24.7(4)  |
| C34  | 8743(2)     | 4658.1(19)  | 956.8(15)   | 27.4(4)  |
| C44  | 12420(3)    | -5277.6(19) | 5397.7(15)  | 35.1(5)  |
| C45  | 12122(2)    | -3266.0(19) | 4985.0(14)  | 27.2(4)  |
| C46  | 11578(2)    | -2148.3(18) | 4483.0(14)  | 25.5(4)  |
| C47  | 5954.9(19)  | -226.5(16)  | 3143.6(12)  | 18.4(4)  |
| C48  | 4629(2)     | 313.5(18)   | 3287.4(13)  | 23.1(4)  |
| C49  | 3666(2)     | 150.7(19)   | 2963.1(15)  | 28.7(5)  |
| C51  | 5328(2)     | -1074(2)    | 2350.4(15)  | 29.1(5)  |
| C50  | 4014(2)     | -532(2)     | 2490.9(15)  | 29.6(5)  |
| C52  | 6295(2)     | -927.1(17)  | 2680.0(14)  | 23.9(4)  |
| C53  | 6418.9(18)  | 1291.3(16)  | 3721.0(12)  | 18.2(4)  |
| C54  | 6061(2)     | 1380.5(17)  | 4516.1(14)  | 24.0(4)  |

|     |            |             |            |         |
|-----|------------|-------------|------------|---------|
| C55 | 5466(2)    | 2425.3(19)  | 4586.2(16) | 29.9(5) |
| C59 | 7692.2(19) | -1071.6(16) | 4608.5(12) | 17.9(4) |
| C58 | 6147(2)    | 2252.1(17)  | 3004.6(13) | 23.5(4) |
| C57 | 5527(2)    | 3291.8(18)  | 3081.9(15) | 28.8(5) |
| C56 | 5196(2)    | 3375.1(18)  | 3873.7(16) | 30.0(5) |
| C64 | 8425.9(19) | -959.0(16)  | 5152.1(13) | 20.8(4) |
| C63 | 8849(2)    | -1783.6(17) | 5935.7(13) | 22.9(4) |
| C62 | 8562(2)    | -2736.6(18) | 6181.5(14) | 26.1(4) |
| C61 | 7844(2)    | -2854.1(19) | 5642.5(14) | 31.0(5) |
| C60 | 7414(2)    | -2029.7(18) | 4857.8(13) | 25.5(4) |

**Table S6.** Anisotropic displacement parameters ( $\text{\AA}^2 \times 10^3$ ) for  $\text{Y}_2\text{Sn}$ . The anisotropic displacement factor exponent takes the form:  $-2p^2[ h^2 a^{*2}U^{11} + \dots + 2 h k a^* b^* U^{12} ]$

| Atom | U <sup>11</sup> | U <sup>22</sup> | U <sup>33</sup> | U <sup>23</sup> | U <sup>13</sup> | U <sup>12</sup> |
|------|-----------------|-----------------|-----------------|-----------------|-----------------|-----------------|
| Sn1  | 18.52(7)        | 15.51(7)        | 17.33(7)        | -4.12(5)        | -1.37(5)        | -7.28(5)        |
| O1   | 20.5(7)         | 26.5(7)         | 22.2(7)         | 0.0(6)          | -2.2(5)         | -14.6(6)        |
| S1   | 15.2(2)         | 19.4(2)         | 17.0(2)         | -2.54(17)       | -1.22(16)       | -7.15(17)       |
| P1   | 15.2(2)         | 15.9(2)         | 15.2(2)         | -2.98(17)       | -0.56(16)       | -7.17(17)       |
| C1   | 17.7(9)         | 14.9(8)         | 18.4(9)         | -0.1(7)         | -2.8(7)         | -7.8(7)         |
| C41  | 29.4(11)        | 22.5(10)        | 24.5(10)        | -4.4(8)         | -11.1(8)        | -8.2(8)         |
| C40  | 17.7(9)         | 18.7(9)         | 20.7(9)         | -4.5(8)         | -3.5(7)         | -5.7(7)         |
| C12  | 19.5(10)        | 25.3(10)        | 27.5(11)        | -0.2(9)         | -8.2(8)         | -5.6(8)         |
| C11  | 18.0(9)         | 26(1)           | 26.2(11)        | -5.2(9)         | -1.3(8)         | -2.4(8)         |
| C10  | 17.9(9)         | 17.5(9)         | 19.4(9)         | -2.0(7)         | -2.2(7)         | -9.6(7)         |
| O4   | 26.8(7)         | 22.6(7)         | 30.4(8)         | -10.3(6)        | -5.0(6)         | -12.0(6)        |
| C13  | 26.6(10)        | 24(1)           | 22(1)           | -1.7(8)         | -5.5(8)         | -16.3(8)        |
| C42  | 34.0(11)        | 21.1(10)        | 28.0(11)        | -5.1(9)         | -9.8(9)         | -8.9(9)         |
| C43  | 24.9(10)        | 23.7(10)        | 19.6(10)        | -4.7(8)         | -2.6(8)         | -3.8(8)         |
| C27  | 19.1(9)         | 18.9(9)         | 14.6(8)         | -2.4(7)         | -2.2(7)         | -9.7(7)         |
| P2   | 16.8(2)         | 14.9(2)         | 15.1(2)         | -2.09(17)       | -2.00(17)       | -8.09(17)       |
| S2   | 17.1(2)         | 16.7(2)         | 20.1(2)         | -4.19(17)       | -3.45(16)       | -8.02(17)       |
| O3   | 17.6(6)         | 23.2(7)         | 24.7(7)         | -5.1(6)         | -0.1(5)         | -9.6(6)         |
| O2   | 21.4(7)         | 28.8(8)         | 22.7(7)         | -9.3(6)         | 1.5(6)          | -5.5(6)         |
| C16  | 17.8(9)         | 18.8(9)         | 23.7(10)        | -5.2(8)         | -6.0(7)         | -4.0(7)         |
| C15  | 25.6(10)        | 25.3(10)        | 24.8(10)        | -10.0(8)        | -1.9(8)         | -10.7(8)        |
| C14  | 44.2(13)        | 36.4(12)        | 23.1(11)        | -3.4(9)         | -8.6(10)        | -19.7(11)       |
| C17  | 20.0(9)         | 17.6(9)         | 18.3(9)         | -2.6(7)         | -0.7(7)         | -11.3(7)        |
| C18  | 23(1)           | 25(1)           | 21.6(10)        | -3.4(8)         | 1.5(8)          | -6.9(8)         |
| C20  | 29.0(11)        | 33.0(12)        | 20.2(10)        | 4.4(9)          | -4.2(8)         | -15.9(9)        |
| C19  | 25.0(11)        | 24.2(10)        | 27.9(11)        | 1.7(9)          | -3.2(9)         | -5.0(9)         |
| C21  | 30.2(11)        | 40.4(13)        | 18.7(10)        | -8.9(9)         | 2.6(8)          | -16.4(10)       |
| C22  | 23.8(10)        | 22.7(10)        | 21.9(10)        | -7.1(8)         | 0.1(8)          | -8.8(8)         |
| C23  | 15.1(8)         | 17.6(9)         | 19.0(9)         | -1.5(7)         | -1.5(7)         | -7.4(7)         |
| C24  | 21.2(10)        | 21.0(9)         | 24.5(10)        | -5.7(8)         | -2.1(8)         | -9.1(8)         |
| C25  | 20(1)           | 28.7(11)        | 38.0(12)        | -9(1)           | -3.4(9)         | -11.2(9)        |
| C26  | 16.6(10)        | 31.3(12)        | 46.8(14)        | -13.4(11)       | 2.0(9)          | -6.7(9)         |
| C0AA | 21.6(10)        | 28.1(11)        | 47.9(14)        | -18(1)          | 3.5(9)          | -7.2(9)         |

|     |          |          |          |           |          |           |
|-----|----------|----------|----------|-----------|----------|-----------|
| C33 | 27.1(11) | 41.2(13) | 58.8(17) | -32.8(13) | 6.0(11)  | -16.2(10) |
| C32 | 24.6(11) | 61.8(17) | 52.7(16) | -43.8(15) | -2.4(10) | -9.0(11)  |
| C31 | 25.4(11) | 57.3(16) | 25.0(11) | -20.8(11) | -5.4(9)  | -5.4(11)  |
| C30 | 19.4(9)  | 33.9(11) | 21.3(10) | -8.5(9)   | -4.6(8)  | -6.5(8)   |
| C29 | 15.7(9)  | 25.8(10) | 23.4(10) | -9.5(8)   | -0.7(7)  | -8.4(8)   |
| C28 | 20.2(10) | 23.6(10) | 31.9(11) | -9.4(9)   | 0.0(8)   | -10.1(8)  |
| C34 | 24.2(10) | 29.7(11) | 35.8(12) | -16.2(10) | 6.3(9)   | -15.3(9)  |
| C44 | 42.8(13) | 25.2(11) | 25.5(11) | -2.8(9)   | -7.6(10) | -4.1(10)  |
| C45 | 27(1)    | 30.1(11) | 20.1(10) | -8.1(9)   | -8.4(8)  | -4.2(9)   |
| C46 | 24.2(10) | 25.7(10) | 27.6(11) | -10.4(9)  | -7.6(8)  | -7.0(8)   |
| C47 | 21.6(9)  | 18.0(9)  | 14.4(8)  | 0.3(7)    | -2.3(7)  | -11.0(7)  |
| C48 | 23.2(10) | 24.9(10) | 22.7(10) | -6.2(8)   | -1.1(8)  | -12.2(8)  |
| C49 | 20.5(10) | 33.4(12) | 31.5(11) | -7.3(9)   | -3.9(8)  | -11.8(9)  |
| C51 | 33.6(12) | 34.8(12) | 30.7(11) | -15(1)    | 1.5(9)   | -21.8(10) |
| C50 | 29.2(11) | 35.6(12) | 30.8(11) | -8.5(10)  | -5.4(9)  | -20.2(10) |
| C52 | 25.2(10) | 23.6(10) | 25.9(10) | -7.1(8)   | 0.7(8)   | -13.8(8)  |
| C53 | 16.1(9)  | 17.7(9)  | 20.9(9)  | -4.6(7)   | -2.0(7)  | -7.7(7)   |
| C54 | 23.9(10) | 21.5(10) | 23.7(10) | -5.8(8)   | -1.7(8)  | -7.1(8)   |
| C55 | 27.7(11) | 29.4(11) | 35.0(12) | -17.4(10) | 1.3(9)   | -7.6(9)   |
| C59 | 20.0(9)  | 17.0(9)  | 15.7(9)  | -2.1(7)   | -1.5(7)  | -8.9(7)   |
| C58 | 24.5(10) | 21.6(10) | 22.1(10) | -3.4(8)   | -2.6(8)  | -9.4(8)   |
| C57 | 27.3(11) | 17.8(10) | 33.9(12) | 0.5(9)    | -6.6(9)  | -7.8(8)   |
| C56 | 24.4(10) | 20.5(10) | 45.7(14) | -14.5(10) | -2.6(9)  | -5.4(8)   |
| C64 | 22.5(9)  | 18.1(9)  | 23(1)    | -5.3(8)   | -2.5(8)  | -9.7(8)   |
| C63 | 24(1)    | 23.5(10) | 21.9(10) | -4.5(8)   | -5.6(8)  | -11.0(8)  |
| C62 | 29.9(11) | 24.8(10) | 20.2(10) | 1.2(8)    | -6.7(8)  | -13.1(9)  |
| C61 | 44.8(13) | 25.1(11) | 25.3(11) | 3.6(9)    | -9.2(10) | -24.1(10) |
| C60 | 33.0(11) | 25.3(10) | 21(1)    | -0.2(8)   | -6.9(8)  | -18.8(9)  |

---

## 2.4 Crystal Structure of 4

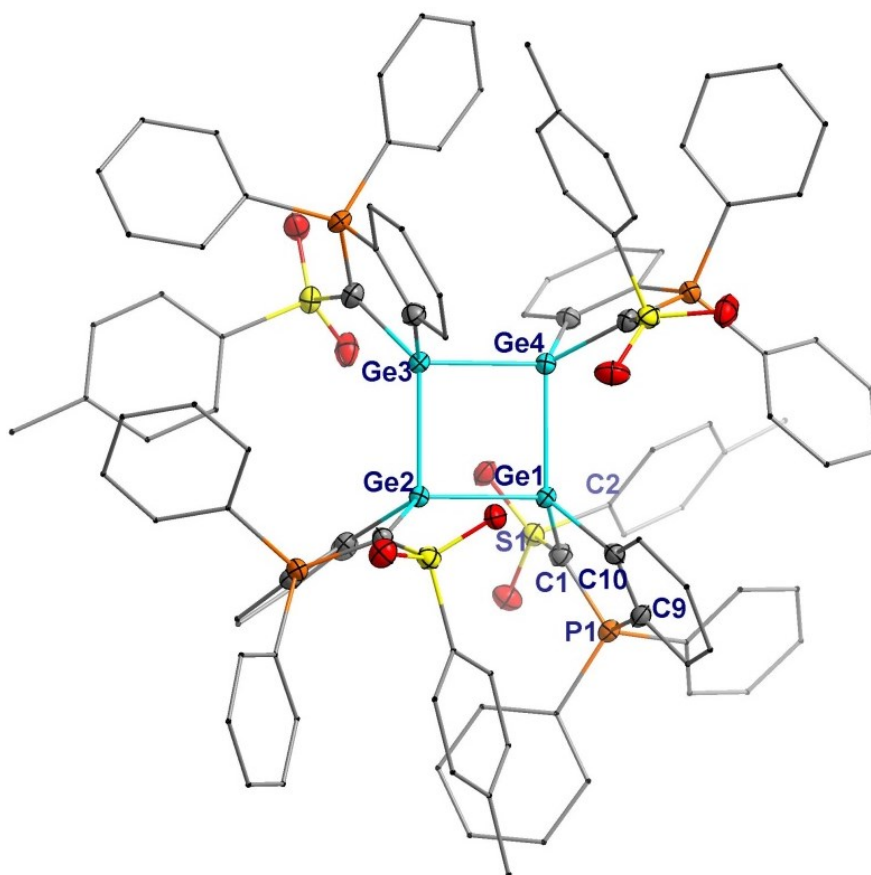

**Figure S27.** X-Ray structure of **4**. Selected bond lengths [Å] and angles [°]: **4**: Ge1-Ge2 2.492(4), Ge1-Ge4 2.480(5), Ge3-Ge2 2.489(4), Ge3-Ge4 2.486(5), Ge1-C1 1.933(3), Ge1-C10 1.964(3), C1-P1 1.706(3), C1-S1 1.671(3), C1-Ge1-C10 93.18(1), S1-C1-P1 121.73(2), Ge1-Ge2-Ge3 90.42(1), Ge2-Ge3-Ge4 89.38(1), Ge3-Ge4-Ge1 90.78(1), Ge4-Ge1-Ge2 89.42(1).

**Table S7.** Atomic Coordinates ( $\times 10^4$ ) and Equivalent Isotropic Displacement Parameters ( $\text{Å}^2 \times 10^3$ ) for **4**.  $U_{\text{eq}}$  is defined as 1/3 of of the trace of the orthogonalised  $U_{ij}$  tensor.

| Atom | <i>x</i>   | <i>y</i>   | <i>z</i>   | $U(\text{eq})$ |
|------|------------|------------|------------|----------------|
| C10  | 8662.6(18) | 4901.0(18) | 6630.7(15) | 19.3(6)        |
| C9   | 9107.2(19) | 4028.6(18) | 6666.0(15) | 20.4(6)        |
| O8   | 5845.5(17) | 7191.4(15) | 5991.6(12) | 32.6(5)        |
| C42  | 5599(2)    | 8475(2)    | 6388.7(16) | 24.9(7)        |
| C32  | 7621.4(19) | 7570.5(18) | 9612.5(15) | 21.4(6)        |
| O7   | 7110.9(14) | 7262.1(14) | 6100.9(12) | 30.4(5)        |
| Ge2  | 8850.4(2)  | 6079.0(2)  | 7646.3(2)  | 16.28(8)       |
| C2   | 7250.4(19) | 3642.2(19) | 8860.1(15) | 22.1(6)        |
| P2   | 10415.1(5) | 6359.4(5)  | 7425.6(4)  | 18.45(15)      |
| S2   | 10004.4(4) | 6507.2(4)  | 6240.3(4)  | 20.01(15)      |
| C21  | 9748.2(18) | 6390.8(18) | 7042.6(15) | 18.9(6)        |

|      |             |            |            |          |
|------|-------------|------------|------------|----------|
| O2   | 7633.7(14)  | 4737.2(13) | 9011.3(11) | 24.2(5)  |
| Ge3  | 7408.5(2)   | 7283.2(2)  | 7906.3(2)  | 17.09(8) |
| Ge4  | 6729.5(2)   | 6515.8(2)  | 7720.5(2)  | 17.22(8) |
| C40  | 5837.0(18)  | 6255.8(19) | 8424.9(15) | 20.7(6)  |
| C41  | 6060.9(19)  | 6880.6(19) | 7108.3(15) | 20.7(6)  |
| C30  | 7220.1(19)  | 8322.7(18) | 7303.0(15) | 21.7(6)  |
| C31  | 6827.3(19)  | 7859.9(19) | 8653.2(15) | 21.2(6)  |
| C20  | 9480.3(19)  | 5565.6(18) | 8318.2(15) | 19.7(6)  |
| C22  | 10870.8(19) | 5543.6(19) | 6009.8(15) | 21.2(6)  |
| C101 | 8635.2(19)  | 5367.9(19) | 6025.9(15) | 21.3(6)  |
| C102 | 9048(2)     | 4973(2)    | 5481.4(16) | 26.7(7)  |
| C103 | 9502(2)     | 4112(2)    | 5527.1(16) | 28.4(7)  |
| C104 | 9526(2)     | 3637(2)    | 6119.9(16) | 27.3(7)  |
| C106 | 6564(2)     | 4135(2)    | 8581.4(18) | 29.5(7)  |
| C108 | 5919(2)     | 3168(2)    | 9110.3(18) | 31.8(8)  |
| C107 | 5907(2)     | 3895(2)    | 8710.5(19) | 33.3(8)  |
| C109 | 5174(3)     | 2938(3)    | 9273(2)    | 45.3(10) |
| C111 | 7285(2)     | 2903(2)    | 9251.2(17) | 28.2(7)  |
| C110 | 6616(2)     | 2677(2)    | 9374.6(18) | 32.7(8)  |
| C112 | 8704(2)     | 2694.0(19) | 7561.6(16) | 22.9(6)  |
| C113 | 7927(2)     | 2992(2)    | 7401(2)    | 35.0(8)  |
| C114 | 7516(3)     | 2478(2)    | 7543(2)    | 41.4(9)  |
| C115 | 7873(2)     | 1670(2)    | 7836.9(19) | 33.5(8)  |
| C116 | 8635(2)     | 1380(2)    | 8001.6(18) | 31.5(7)  |
| C117 | 9052(2)     | 1889.2(19) | 7865.7(17) | 26.2(7)  |
| C118 | 10221.2(19) | 2907.5(18) | 7517.4(15) | 21.6(6)  |
| C119 | 10457(2)    | 3212(2)    | 7880.2(16) | 25.1(7)  |
| C120 | 11311(2)    | 2855(2)    | 7910.7(18) | 32.7(8)  |
| C121 | 11931(2)    | 2201(2)    | 7571.8(19) | 36.3(8)  |
| C122 | 11706(2)    | 1894(2)    | 7209.9(18) | 32.1(8)  |
| C123 | 10850(2)    | 2245(2)    | 7176.9(16) | 25.7(7)  |
| C209 | 12928(2)    | 4778(2)    | 6720.7(19) | 37.3(9)  |
| C208 | 12058(2)    | 5085(2)    | 7058.4(17) | 28.4(7)  |
| C207 | 11566.5(19) | 5947(2)    | 7023.0(16) | 22.7(6)  |
| C201 | 10761(2)    | 4814.2(19) | 6278.3(16) | 24.2(6)  |
| C202 | 11433(2)    | 4053(2)    | 6125.4(17) | 28.3(7)  |
| C203 | 12228(2)    | 4002(2)    | 5702.2(17) | 29.4(7)  |
| C204 | 12958(3)    | 3164(2)    | 5545(2)    | 44(1)    |
| C205 | 12326(2)    | 4734(2)    | 5436.6(17) | 31.4(7)  |
| C206 | 11656(2)    | 5503(2)    | 5584.0(16) | 26.9(7)  |
| C219 | 9576(2)     | 8080(2)    | 7305.3(18) | 31.7(7)  |
| C218 | 10149.1(19) | 7369.2(19) | 7595.4(16) | 22.8(6)  |
| C217 | 9282(2)     | 5064.2(19) | 8888.6(15) | 23.4(6)  |
| C210 | 13302(2)    | 5312(3)    | 6355(2)    | 41.4(9)  |
| C211 | 12815(2)    | 6160(3)    | 6309.2(18) | 36.8(8)  |
| C212 | 11941(2)    | 6483(2)    | 6650.2(17) | 28.4(7)  |
| C29  | 10224.7(18) | 5699.7(18) | 8170.3(15) | 20.1(6)  |
| C214 | 10770(2)    | 5326(2)    | 8578.5(16) | 26.1(7)  |



|      |            |            |            |          |
|------|------------|------------|------------|----------|
| C215 | 10577(2)   | 4813(2)    | 9134.6(17) | 30.9(7)  |
| C216 | 9833(2)    | 4689(2)    | 9285.6(17) | 29.9(7)  |
| C220 | 9410(3)    | 8854(2)    | 7409(2)    | 42.1(9)  |
| C221 | 9802(2)    | 8917(2)    | 7800(2)    | 40.0(9)  |
| C222 | 10351(3)   | 8212(3)    | 8097(2)    | 44.9(10) |
| C223 | 10533(2)   | 7434(2)    | 7996(2)    | 38.4(9)  |
| C301 | 7537(2)    | 8403(2)    | 6638.8(16) | 27.2(7)  |
| C302 | 7316(2)    | 9181(2)    | 6275.1(17) | 34.7(8)  |
| C303 | 6766(3)    | 9899(2)    | 6574.9(19) | 38.1(9)  |
| C304 | 6449(2)    | 9832(2)    | 7233.8(17) | 32.1(8)  |
| C39  | 6676(2)    | 9047.6(19) | 7596.2(16) | 25.3(7)  |
| C306 | 5092(2)    | 9248(2)    | 8627.8(16) | 25.3(7)  |
| C307 | 4766(2)    | 8656(2)    | 8830.1(17) | 28.3(7)  |
| C308 | 3882(2)    | 8892(3)    | 8935.7(19) | 38.4(9)  |
| C309 | 3329(2)    | 9721(3)    | 8836(2)    | 44.9(10) |
| C310 | 3643(2)    | 10325(3)   | 8633(2)    | 42.1(9)  |
| C311 | 4523(2)    | 10092(2)   | 8524.8(18) | 32.5(8)  |
| C312 | 6431(2)    | 9559.3(19) | 8792.3(16) | 23.7(6)  |
| C313 | 7277(2)    | 9490(2)    | 8609.9(18) | 29.6(7)  |
| C314 | 7481(2)    | 9918(2)    | 8889(2)    | 36.3(8)  |
| C315 | 6842(2)    | 10423(2)   | 9342(2)    | 36.9(8)  |
| C316 | 5999(2)    | 10501(2)   | 9525.1(18) | 31.8(7)  |
| C317 | 5797(2)    | 10064(2)   | 9247.3(16) | 25.3(7)  |
| C318 | 7415(2)    | 8155(2)    | 9978.9(19) | 32.7(8)  |
| C319 | 8070(2)    | 8195(2)    | 10125(2)   | 37.2(9)  |
| C320 | 8934(2)    | 7659(2)    | 9908.9(17) | 29.8(7)  |
| C321 | 9125(2)    | 7088(2)    | 9535.0(19) | 34.8(8)  |
| C322 | 9643(3)    | 7694(3)    | 10074(2)   | 42.1(9)  |
| C323 | 8479(2)    | 7036(2)    | 9388.1(19) | 33.5(8)  |
| C401 | 5542(3)    | 8994(2)    | 5815(2)    | 40.1(9)  |
| C402 | 5110(3)    | 9846(2)    | 5809(2)    | 44.1(10) |
| C403 | 4718(2)    | 10196(2)   | 6370(2)    | 39.2(9)  |
| C404 | 4262(3)    | 11131(3)   | 6353(2)    | 53.9(12) |
| C405 | 4793(3)    | 9673(2)    | 6934(2)    | 40.9(9)  |
| C406 | 5234(3)    | 8811(2)    | 6953.0(19) | 37.9(8)  |
| C407 | 4217(2)    | 7247(2)    | 7283.4(17) | 25.9(7)  |
| C408 | 3760(2)    | 7899(2)    | 7645(2)    | 39.7(9)  |
| C409 | 2943(3)    | 8494(3)    | 7587(3)    | 54.4(12) |
| C410 | 2586(2)    | 8438(3)    | 7168(2)    | 48.9(11) |
| C411 | 3042(2)    | 7805(2)    | 6798(2)    | 38.9(9)  |
| C412 | 3862(2)    | 7203(2)    | 6857.4(17) | 30.2(7)  |
| C414 | 6359(2)    | 5261(2)    | 6606.8(17) | 29.9(7)  |
| C415 | 6586(3)    | 4540(2)    | 6380.4(19) | 39.1(9)  |
| C416 | 6045(3)    | 4138(2)    | 6612(2)    | 43.8(10) |
| C417 | 5270(3)    | 4451(2)    | 7074(2)    | 42.5(9)  |
| C418 | 5031(2)    | 5175(2)    | 7299.1(19) | 32.6(8)  |
| C419 | 5571(2)    | 5586(2)    | 7069.7(16) | 25.1(7)  |
| C49  | 5186.7(19) | 6261.2(19) | 8231.2(15) | 21.8(6)  |

|      |            |            |            |          |
|------|------------|------------|------------|----------|
| C421 | 4503(2)    | 6093(2)    | 8677.6(17) | 27.2(7)  |
| C422 | 4470(2)    | 5920(2)    | 9320.9(17) | 30.0(7)  |
| C423 | 5111(2)    | 5919(2)    | 9519.5(16) | 26.3(7)  |
| C424 | 5789.0(19) | 6080.5(19) | 9076.9(16) | 23.0(6)  |
| C500 | 7934(4)    | 2841(5)    | 724(3)     | 84.3(14) |
| C501 | 7652(2)    | 3615(3)    | 991(2)     | 45.4(10) |
| C502 | 7529(3)    | 4367(4)    | 589(2)     | 58.6(14) |
| C503 | 7208(3)    | 5101(4)    | 847(3)     | 66.1(16) |
| C504 | 7022(3)    | 5075(3)    | 1499(3)    | 54.9(12) |
| C505 | 7168(2)    | 4330(3)    | 1883(2)    | 45.1(10) |
| C506 | 7465(2)    | 3617(3)    | 1644(2)    | 41.3(10) |
| C510 | 9185(6)    | 1184(5)    | 4234(4)    | 108(3)   |
| C511 | 8918(4)    | 1093(5)    | 4958(3)    | 80.5(18) |
| C512 | 8763(4)    | 1743(4)    | 5240(4)    | 86(2)    |
| C513 | 8466(4)    | 1721(5)    | 5929(4)    | 92(2)    |
| C514 | 8350(4)    | 1024(4)    | 6267(3)    | 73.0(16) |
| C515 | 8531(4)    | 373(5)     | 5960(3)    | 78.2(18) |
| C516 | 8842(4)    | 371(5)     | 5281(4)    | 96(2)    |
| C520 | 1337(2)    | 9402(3)    | 150(2)     | 41.3(9)  |
| C521 | 479(2)     | 9493(2)    | 627.4(18)  | 31.6(7)  |
| C522 | 181(2)     | 8885(2)    | 759.9(18)  | 30.3(7)  |
| C523 | -598(2)    | 8958(2)    | 1213.1(18) | 31.2(7)  |
| C524 | -1087(2)   | 9639(2)    | 1540.0(19) | 35.3(8)  |
| C525 | -795(3)    | 10248(2)   | 1413(2)    | 39.0(9)  |
| C526 | -24(2)     | 10179(2)   | 959.7(19)  | 35.1(8)  |
| C530 | 3747(4)    | 8694(5)    | 5184(3)    | 84.3(14) |
| C531 | 3958(4)    | 7858(4)    | 5041(2)    | 69.4(16) |
| C532 | 4694(4)    | 7146(6)    | 5143(3)    | 86(2)    |
| C533 | 4867(3)    | 6395(5)    | 4995(3)    | 81(2)    |
| C534 | 4319(3)    | 6338(4)    | 4753(2)    | 64.0(14) |
| C535 | 3584(3)    | 7033(4)    | 4664(2)    | 58.2(13) |
| C536 | 3408(3)    | 7785(3)    | 4801(2)    | 56.9(12) |
| C540 | 640(4)     | 390(4)     | 6661(3)    | 70.6(15) |
| C541 | 2000(3)    | 601(3)     | 6116(2)    | 46.8(10) |
| C542 | 2480(4)    | 977(3)     | 5674(3)    | 64.1(13) |
| C543 | 2145(4)    | 1581(3)    | 5242(3)    | 64.7(14) |
| C544 | 1319(4)    | 1834(3)    | 5216(2)    | 59.6(15) |
| C545 | 789(4)     | 1432(3)    | 5689(3)    | 67.0(15) |
| C546 | 1162(3)    | 799(2)     | 6156(2)    | 42.6(9)  |
| C550 | 3096(4)    | 2812(4)    | 8372(4)    | 91(2)    |
| C551 | 3990(4)    | 2522(3)    | 7989(3)    | 66.1(15) |
| C552 | 4216(5)    | 2565(3)    | 7319(3)    | 76.5(19) |
| C553 | 5058(6)    | 2325(4)    | 6957(4)    | 87(2)    |
| C554 | 5719(5)    | 2015(3)    | 7240(4)    | 88(2)    |
| C555 | 5506(4)    | 1937(3)    | 7911(4)    | 74.4(17) |
| C556 | 4663(4)    | 2185(3)    | 8269(3)    | 66.0(15) |
| C1   | 8441.9(19) | 4208.0(18) | 7940.6(15) | 20.4(6)  |
| Ge1  | 8164.5(2)  | 5313.6(2)  | 7460.8(2)  | 16.15(8) |

|    |             |            |            |           |
|----|-------------|------------|------------|-----------|
| P1 | 9109.4(5)   | 3452.1(4)  | 7456.9(4)  | 18.78(15) |
| O1 | 8734.5(14)  | 3270.6(14) | 9002.7(11) | 27.0(5)   |
| S1 | 8068.2(4)   | 3975.7(4)  | 8729.7(4)  | 19.57(14) |
| O5 | 5986.6(14)  | 8028.1(15) | 9822.8(11) | 27.8(5)   |
| O6 | 7024.0(16)  | 6605.5(14) | 9535.6(12) | 30.5(5)   |
| O3 | 10356.3(15) | 7118.5(14) | 5956.0(11) | 27.0(5)   |
| O4 | 9272.5(14)  | 6623.6(13) | 6048.6(11) | 24.0(5)   |
| P4 | 5285.2(5)   | 6513.1(5)  | 7381.5(4)  | 20.48(16) |
| P3 | 6259.0(5)   | 8901.0(5)  | 8450.1(4)  | 20.24(15) |
| S4 | 6217.0(5)   | 7383.4(4)  | 6363.0(4)  | 21.43(15) |
| S3 | 6798.6(5)   | 7484.9(5)  | 9427.6(4)  | 20.67(15) |

**Table S8.** Anisotropic displacement parameters ( $\text{\AA}^2 \times 10^3$ ) for **4**. The anisotropic displacement factor exponent takes the form:  $-2p^2 [ h^2 a^* U^{11} + \dots + 2 h k a^* b^* U^{12} ]$

| Atom | U <sup>11</sup> | U <sup>22</sup> | U <sup>33</sup> | U <sup>23</sup> | U <sup>13</sup> | U <sup>12</sup> |
|------|-----------------|-----------------|-----------------|-----------------|-----------------|-----------------|
| C10  | 15.6(13)        | 22.7(14)        | 20.5(16)        | -5.2(12)        | -6.1(11)        | -6.6(11)        |
| C9   | 21.5(14)        | 19.5(14)        | 21.4(16)        | -8.0(12)        | -3.5(12)        | -8.5(11)        |
| O8   | 45.0(14)        | 29.9(12)        | 29.9(14)        | -5.6(10)        | -19.8(11)       | -13.6(11)       |
| C42  | 19.7(14)        | 25.4(15)        | 28.3(18)        | -9.5(13)        | -7.0(13)        | -5.1(12)        |
| C32  | 22.6(14)        | 21.6(14)        | 21.4(16)        | -4.0(12)        | -7.0(12)        | -8.9(12)        |
| O7   | 20.9(11)        | 28.7(12)        | 30.0(13)        | -3.4(10)        | -1.8(10)        | -5.9(9)         |
| Ge2  | 14.61(15)       | 16.46(15)       | 18.79(18)       | -5.55(12)       | -4.50(13)       | -5.66(12)       |
| C2   | 20.0(14)        | 22.3(14)        | 21.7(16)        | -8.1(12)        | 0.4(12)         | -8.8(12)        |
| P2   | 14.6(3)         | 20.6(3)         | 21.5(4)         | -5.9(3)         | -4.9(3)         | -6.8(3)         |
| S2   | 18.8(3)         | 20.8(3)         | 19.9(4)         | -3.1(3)         | -5.8(3)         | -7.5(3)         |
| C21  | 15.4(13)        | 23.7(14)        | 19.2(15)        | -5.6(12)        | -4.6(11)        | -8.0(11)        |
| O2   | 23.3(10)        | 27.6(11)        | 23.0(12)        | -13.5(9)        | -0.5(9)         | -10.4(9)        |
| Ge3  | 15.96(15)       | 15.84(15)       | 19.60(18)       | -6.13(13)       | -4.86(13)       | -4.78(12)       |
| Ge4  | 14.62(15)       | 18.83(16)       | 19.13(18)       | -6.52(13)       | -4.76(13)       | -5.51(12)       |
| C40  | 15.4(13)        | 23.9(14)        | 22.8(16)        | -6.3(12)        | -4.3(12)        | -7.3(11)        |
| C41  | 19.8(14)        | 23.2(14)        | 20.2(16)        | -6.6(12)        | -5.4(12)        | -8.0(12)        |
| C30  | 22.6(14)        | 18.3(14)        | 23.6(17)        | -4.9(12)        | -7.1(12)        | -6.6(12)        |
| C31  | 22.1(14)        | 22.5(14)        | 20.0(16)        | -7.7(12)        | -4.9(12)        | -8.1(12)        |
| C20  | 19.0(13)        | 18.2(13)        | 23.0(16)        | -9.3(11)        | -6.3(12)        | -4.7(11)        |
| C22  | 20.9(14)        | 24.9(15)        | 17.4(15)        | -4.7(12)        | -6.7(12)        | -7.3(12)        |
| C101 | 19.0(14)        | 23.6(15)        | 22.6(16)        | -7.3(12)        | -5.3(12)        | -7.9(12)        |
| C102 | 27.6(16)        | 32.0(17)        | 21.1(17)        | -5.9(13)        | -9.1(13)        | -10.2(13)       |
| C103 | 30.6(17)        | 32.2(17)        | 20.3(17)        | -15.1(13)       | -4.0(13)        | -7.6(14)        |
| C104 | 29.1(16)        | 23.6(15)        | 27.2(18)        | -8.2(13)        | -8.8(14)        | -6.4(13)        |
| C106 | 26.8(16)        | 23.8(16)        | 39(2)           | -2.2(14)        | -11.4(15)       | -11.2(13)       |
| C108 | 28.4(17)        | 30.6(17)        | 38(2)           | -19.3(15)       | 4.2(15)         | -15.2(14)       |
| C107 | 26.4(16)        | 28.9(17)        | 47(2)           | -10.4(16)       | -10.6(16)       | -10.6(14)       |
| C109 | 39(2)           | 50(2)           | 56(3)           | -26(2)          | 8.0(19)         | -30.2(19)       |
| C111 | 30.3(16)        | 22.7(15)        | 29.2(19)        | -3.0(13)        | -6.7(14)        | -10.8(13)       |
| C110 | 39.7(19)        | 26.8(17)        | 31(2)           | -5.6(14)        | -0.4(15)        | -19.6(15)       |

|      |          |          |          |           |           |           |
|------|----------|----------|----------|-----------|-----------|-----------|
| C112 | 22.8(15) | 22.1(15) | 23.4(17) | -7.7(12)  | -4.4(12)  | -8.0(12)  |
| C113 | 37.9(19) | 24.2(16) | 51(2)    | -1.2(15)  | -22.6(18) | -13.6(15) |
| C114 | 36.7(19) | 33.0(19) | 67(3)    | -2.6(18)  | -28(2)    | -16.0(16) |
| C115 | 34.8(18) | 29.3(17) | 45(2)    | -9.0(15)  | -12.2(16) | -17.3(15) |
| C116 | 33.6(18) | 24.2(16) | 38(2)    | -4.0(14)  | -11.5(15) | -12.3(14) |
| C117 | 25.9(15) | 21.6(15) | 32.6(19) | -5.6(13)  | -9.3(14)  | -9.2(13)  |
| C118 | 19.1(14) | 20.6(14) | 22.8(16) | -3.9(12)  | -4.3(12)  | -7.2(11)  |
| C119 | 22.2(15) | 26.0(15) | 27.0(18) | -10.6(13) | -3.2(13)  | -8.7(12)  |
| C120 | 25.4(16) | 40.8(19) | 38(2)    | -10.6(16) | -9.7(15)  | -14.5(15) |
| C121 | 20.3(16) | 41(2)    | 44(2)    | -6.1(17)  | -8.2(15)  | -10.4(14) |
| C122 | 20.8(15) | 32.3(18) | 34(2)    | -11.7(15) | 1.4(14)   | -6.5(13)  |
| C123 | 23.1(15) | 24.0(15) | 27.0(18) | -9.4(13)  | -2.7(13)  | -7.3(12)  |
| C209 | 23.3(16) | 36.7(19) | 36(2)    | -11.5(16) | -6.5(15)  | 1.4(14)   |
| C208 | 23.6(15) | 30.3(17) | 27.4(18) | -6.7(14)  | -7.7(14)  | -6.4(13)  |
| C207 | 16.5(13) | 29.9(16) | 23.6(17) | -7.4(13)  | -5.6(12)  | -9.2(12)  |
| C201 | 22.0(15) | 26.2(16) | 23.4(17) | -7.0(13)  | -4.0(13)  | -8.9(12)  |
| C202 | 28.3(16) | 23.3(15) | 29.0(19) | -3.4(13)  | -8.3(14)  | -7.3(13)  |
| C203 | 25.6(16) | 29.6(17) | 22.8(18) | -7.7(13)  | -7.2(13)  | -1.3(13)  |
| C204 | 33.2(19) | 34(2)    | 41(2)    | -8.8(17)  | -4.3(17)  | 1.6(16)   |
| C205 | 20.3(15) | 38.6(19) | 25.8(18) | -8.5(15)  | 0.5(13)   | -7.9(14)  |
| C206 | 23.8(15) | 31.9(17) | 23.1(17) | -3.0(13)  | -4.9(13)  | -11.9(13) |
| C219 | 32.5(17) | 29.0(17) | 33(2)    | -9.7(14)  | -9.4(15)  | -9.1(14)  |
| C218 | 17.5(13) | 24.5(15) | 27.3(17) | -7.1(13)  | -1.4(12)  | -11.0(12) |
| C217 | 23.3(15) | 23.0(15) | 22.9(17) | -6.5(12)  | -3.4(12)  | -9.2(12)  |
| C210 | 17.6(16) | 59(3)    | 40(2)    | -19.5(19) | -3.2(15)  | -7.1(16)  |
| C211 | 27.2(17) | 56(2)    | 30(2)    | -11.2(17) | 0.8(15)   | -23.3(17) |
| C212 | 21.9(15) | 35.0(18) | 29.8(19) | -9.8(14)  | -4.6(13)  | -12.0(14) |
| C29  | 16.9(13) | 22.2(14) | 19.8(16) | -9.4(12)  | -3.1(12)  | -5.0(11)  |
| C214 | 23.8(15) | 33.0(17) | 24.0(17) | -7.4(13)  | -8.4(13)  | -10.7(13) |
| C215 | 29.3(17) | 37.7(19) | 25.1(18) | -2.3(14)  | -13.9(14) | -10.3(14) |
| C216 | 34.0(17) | 31.8(17) | 24.9(18) | -3.0(14)  | -10.0(14) | -13.9(14) |
| C220 | 45(2)    | 24.2(17) | 51(3)    | -10.9(16) | -9.9(19)  | -9.2(16)  |
| C221 | 40(2)    | 33.8(19) | 53(3)    | -21.9(18) | 2.0(18)   | -21.5(16) |
| C222 | 43(2)    | 42(2)    | 65(3)    | -25(2)    | -17(2)    | -18.0(18) |
| C223 | 33.0(18) | 35.5(19) | 55(3)    | -13.3(17) | -19.4(18) | -12.0(15) |
| C301 | 30.8(16) | 26.2(16) | 22.4(17) | -7.6(13)  | -5.3(14)  | -9.3(13)  |
| C302 | 45(2)    | 30.5(18) | 20.5(18) | -5.8(14)  | -5.7(15)  | -10.8(16) |
| C303 | 49(2)    | 20.3(16) | 31(2)    | 1.3(14)   | -9.9(17)  | -7.0(15)  |
| C304 | 36.7(18) | 20.4(15) | 27.5(19) | -7.9(13)  | -3.4(15)  | -4.5(14)  |
| C39  | 23.1(15) | 21.7(15) | 27.6(18) | -7.7(13)  | -5.7(13)  | -5.2(12)  |
| C306 | 21.2(15) | 28.1(16) | 24.8(17) | -9.4(13)  | -7.7(13)  | -4.9(12)  |
| C307 | 25.7(16) | 34.2(17) | 26.8(18) | -14.1(14) | -4.5(13)  | -10.6(14) |
| C308 | 32.0(18) | 57(2)    | 35(2)    | -16.8(18) | -6.3(16)  | -22.0(18) |
| C309 | 21.9(17) | 69(3)    | 42(2)    | -21(2)    | -8.6(16)  | -10.8(18) |
| C310 | 25.8(17) | 45(2)    | 40(2)    | -16.5(18) | -10.2(16) | 3.0(16)   |
| C311 | 29.4(17) | 29.0(17) | 33(2)    | -8.5(15)  | -10.9(15) | -4.1(14)  |
| C312 | 25.1(15) | 19.7(14) | 25.9(17) | -5.9(12)  | -5.3(13)  | -8.9(12)  |
| C313 | 28.7(16) | 27.9(16) | 33(2)    | -11.1(14) | 1.1(14)   | -15.4(14) |

|      |          |          |          |           |           |           |
|------|----------|----------|----------|-----------|-----------|-----------|
| C314 | 31.7(18) | 37.0(19) | 47(2)    | -17.3(17) | -1.1(16)  | -19.9(15) |
| C315 | 42(2)    | 36.2(19) | 45(2)    | -15.3(17) | -8.4(17)  | -23.1(17) |
| C316 | 36.2(18) | 27.6(17) | 33(2)    | -13.4(14) | -1.8(15)  | -14.9(14) |
| C317 | 24.5(15) | 25.8(15) | 25.6(18) | -7.8(13)  | -2.0(13)  | -11.8(13) |
| C318 | 24.5(16) | 35.6(18) | 40(2)    | -23.5(16) | -4.1(15)  | -7.8(14)  |
| C319 | 34.9(19) | 41(2)    | 47(2)    | -24.4(17) | -11.6(17) | -13.9(16) |
| C320 | 29.3(17) | 35.4(18) | 29.6(19) | -4.0(14)  | -9.4(14)  | -16.5(14) |
| C321 | 20.2(15) | 44(2)    | 38(2)    | -21.3(17) | -7.9(15)  | -3.7(14)  |
| C322 | 36(2)    | 54(2)    | 50(3)    | -13.0(19) | -15.1(18) | -23.2(18) |
| C323 | 27.6(17) | 34.0(18) | 40(2)    | -23.7(16) | -10.4(15) | -3.0(14)  |
| C401 | 49(2)    | 31.1(19) | 34(2)    | -5.9(16)  | -14.8(18) | -8.2(16)  |
| C402 | 55(2)    | 31.9(19) | 39(2)    | -2.7(17)  | -20.3(19) | -9.7(18)  |
| C403 | 33.6(19) | 25.6(18) | 52(3)    | -8.9(16)  | -13.3(18) | -4.5(15)  |
| C404 | 54(3)    | 29(2)    | 63(3)    | -15(2)    | -12(2)    | -3.4(18)  |
| C405 | 40(2)    | 34.1(19) | 45(2)    | -18.8(17) | -14.7(18) | -3.5(16)  |
| C406 | 44(2)    | 33.9(19) | 33(2)    | -8.7(16)  | -15.9(17) | -7.9(16)  |
| C407 | 17.9(14) | 29.0(16) | 30.2(18) | -5.4(13)  | -8.6(13)  | -7.3(12)  |
| C408 | 28.4(18) | 40(2)    | 53(3)    | -23.4(18) | -16.4(17) | -2.8(15)  |
| C409 | 32(2)    | 39(2)    | 83(4)    | -29(2)    | -20(2)    | 6.7(17)   |
| C410 | 25.4(18) | 39(2)    | 72(3)    | -3(2)     | -24(2)    | -0.1(16)  |
| C411 | 31.5(18) | 45(2)    | 44(2)    | 3.0(17)   | -23.5(17) | -14.8(16) |
| C412 | 27.4(16) | 35.1(18) | 30.2(19) | -2.7(14)  | -12.2(14) | -12.8(14) |
| C414 | 28.0(16) | 28.6(17) | 29.8(19) | -9.1(14)  | -8.8(14)  | -6.0(13)  |
| C415 | 48(2)    | 30.6(18) | 32(2)    | -13.7(15) | -14.1(17) | -3.7(16)  |
| C416 | 65(3)    | 28.2(18) | 45(2)    | -9.1(17)  | -27(2)    | -13.3(18) |
| C417 | 54(2)    | 39(2)    | 50(3)    | -7.5(18)  | -22(2)    | -25.1(19) |
| C418 | 33.7(18) | 33.3(18) | 37(2)    | -9.5(15)  | -11.3(16) | -15.3(15) |
| C419 | 25.9(15) | 26.8(16) | 25.8(17) | -3.5(13)  | -13.6(13) | -8.9(13)  |
| C49  | 17.1(13) | 24.1(15) | 22.7(17) | -9.6(12)  | -2.2(12)  | -6.3(12)  |
| C421 | 18.9(14) | 34.1(17) | 29.5(19) | -8.4(14)  | -5.5(13)  | -10.5(13) |
| C422 | 19.4(15) | 38.6(19) | 30.8(19) | -11.3(15) | 0.8(13)   | -13.2(14) |
| C423 | 26.1(16) | 31.7(17) | 19.6(17) | -9.4(13)  | -0.6(13)  | -11.8(13) |
| C424 | 20.2(14) | 23.8(15) | 26.5(17) | -6.7(12)  | -8.7(13)  | -7.1(12)  |
| C500 | 87(3)    | 119(4)   | 68(3)    | -37(3)    | 2(2)      | -63(3)    |
| C501 | 24.2(17) | 78(3)    | 39(2)    | -10(2)    | -7.0(16)  | -25.6(19) |
| C502 | 43(2)    | 116(5)   | 25(2)    | 9(2)      | -13.9(18) | -47(3)    |
| C503 | 53(3)    | 80(4)    | 75(4)    | 35(3)     | -41(3)    | -44(3)    |
| C504 | 40(2)    | 64(3)    | 72(3)    | 0(2)      | -28(2)    | -27(2)    |
| C505 | 29.8(19) | 75(3)    | 40(2)    | -4(2)     | -15.1(17) | -27(2)    |
| C506 | 29.8(18) | 62(3)    | 36(2)    | 7.3(19)   | -14.9(16) | -26.0(18) |
| C510 | 133(7)   | 107(6)   | 81(5)    | -22(4)    | -6(5)     | -60(5)    |
| C511 | 68(4)    | 95(5)    | 79(5)    | -7(4)     | -30(3)    | -31(3)    |
| C512 | 58(3)    | 74(4)    | 126(6)   | 26(4)     | -37(4)    | -41(3)    |
| C513 | 61(4)    | 102(5)   | 100(6)   | 15(4)     | -27(4)    | -37(4)    |
| C514 | 56(3)    | 98(5)    | 67(4)    | -1(3)     | -16(3)    | -40(3)    |
| C515 | 66(3)    | 116(5)   | 66(4)    | 1(4)      | -21(3)    | -55(4)    |
| C516 | 84(4)    | 107(5)   | 108(6)   | 30(4)     | -48(4)    | -58(4)    |
| C520 | 32.0(19) | 43(2)    | 47(2)    | -1.4(18)  | -15.5(18) | -13.8(16) |

|      |           |           |           |           |           |           |
|------|-----------|-----------|-----------|-----------|-----------|-----------|
| C521 | 29.6(17)  | 33.4(18)  | 33(2)     | -1.3(15)  | -15.5(15) | -11.4(14) |
| C522 | 30.0(17)  | 28.1(17)  | 36(2)     | -7.9(14)  | -16.4(15) | -7.2(14)  |
| C523 | 34.5(18)  | 25.4(16)  | 36(2)     | -3.0(14)  | -15.1(16) | -11.6(14) |
| C524 | 32.6(18)  | 34.2(19)  | 35(2)     | -7.0(15)  | -7.1(16)  | -11.2(15) |
| C525 | 43(2)     | 31.9(19)  | 43(2)     | -12.8(16) | -10.6(18) | -13.2(16) |
| C526 | 42(2)     | 30.2(18)  | 41(2)     | -4.2(15)  | -16.3(17) | -17.4(16) |
| C530 | 87(3)     | 119(4)    | 68(3)     | -37(3)    | 2(2)      | -63(3)    |
| C531 | 78(4)     | 118(5)    | 35(3)     | -30(3)    | 14(2)     | -69(4)    |
| C532 | 62(3)     | 183(8)    | 45(3)     | -40(4)    | 2(3)      | -74(5)    |
| C533 | 40(3)     | 134(6)    | 50(3)     | -25(4)    | -5(2)     | -21(3)    |
| C534 | 45(3)     | 87(4)     | 50(3)     | -30(3)    | -2(2)     | -16(3)    |
| C535 | 46(2)     | 89(4)     | 45(3)     | -29(3)    | -7(2)     | -25(2)    |
| C536 | 55(3)     | 75(3)     | 37(3)     | -17(2)    | -4(2)     | -27(2)    |
| C540 | 58(3)     | 65(3)     | 88(4)     | -15(3)    | -13(3)    | -29(3)    |
| C541 | 50(2)     | 44(2)     | 47(3)     | -10.6(19) | -7(2)     | -20.8(19) |
| C542 | 75(3)     | 66(3)     | 54(3)     | -13(3)    | -8(3)     | -36(3)    |
| C543 | 74(4)     | 62(3)     | 51(3)     | -23(3)    | 2(3)      | -28(3)    |
| C544 | 99(4)     | 30(2)     | 23(2)     | -8.3(16)  | -21(2)    | -2(2)     |
| C545 | 63(3)     | 61(3)     | 70(4)     | -40(3)    | -26(3)    | 2(2)      |
| C546 | 46(2)     | 33.4(19)  | 48(3)     | -15.1(17) | -12.8(19) | -11.6(17) |
| C550 | 94(5)     | 78(4)     | 135(7)    | 2(4)      | -53(5)    | -56(4)    |
| C551 | 79(4)     | 42(2)     | 95(5)     | -2(3)     | -43(3)    | -29(2)    |
| C552 | 136(6)    | 44(3)     | 84(4)     | 16(3)     | -74(4)    | -47(3)    |
| C553 | 137(7)    | 59(3)     | 81(5)     | -12(3)    | -20(5)    | -59(4)    |
| C554 | 121(6)    | 37(3)     | 126(6)    | -11(3)    | -50(5)    | -36(3)    |
| C555 | 88(4)     | 45(3)     | 102(5)    | -8(3)     | -48(4)    | -23(3)    |
| C556 | 93(4)     | 48(3)     | 85(4)     | 3(3)      | -55(4)    | -36(3)    |
| C1   | 19.7(14)  | 17.6(13)  | 24.5(17)  | -5.1(12)  | -4.5(12)  | -8.2(11)  |
| Ge1  | 15.26(15) | 15.83(15) | 17.81(18) | -5.75(12) | -3.88(13) | -5.47(12) |
| P1   | 18.9(3)   | 16.3(3)   | 21.7(4)   | -6.3(3)   | -5.4(3)   | -6.0(3)   |
| O1   | 23.1(11)  | 29.1(12)  | 25.5(12)  | -0.3(9)   | -7.4(9)   | -9.9(9)   |
| S1   | 19.1(3)   | 20.5(3)   | 19.5(4)   | -4.7(3)   | -4.2(3)   | -8.3(3)   |
| O5   | 21.1(11)  | 40.6(13)  | 23.2(12)  | -11(1)    | -1.6(9)   | -13.7(10) |
| O6   | 43.1(14)  | 26.0(12)  | 34.1(14)  | 1.9(10)   | -19.2(11) | -20.5(10) |
| O3   | 29.6(11)  | 25.3(11)  | 25.5(12)  | -2.6(9)   | -5.2(10)  | -13.3(9)  |
| O4   | 22.5(10)  | 25.3(11)  | 25.4(12)  | -6.9(9)   | -10.9(9)  | -6.1(9)   |
| P4   | 15.7(3)   | 23.7(4)   | 23.1(4)   | -7.8(3)   | -6.3(3)   | -6.0(3)   |
| P3   | 19.7(3)   | 17.1(3)   | 22.5(4)   | -8.6(3)   | -4.2(3)   | -4.7(3)   |
| S4   | 20.2(3)   | 21.7(3)   | 20.1(4)   | -5.8(3)   | -6.4(3)   | -4.9(3)   |
| S3   | 22.5(3)   | 23.5(3)   | 19.9(4)   | -4.4(3)   | -5.7(3)   | -11.9(3)  |

---

## 2.5 Crystal Structure of 5a

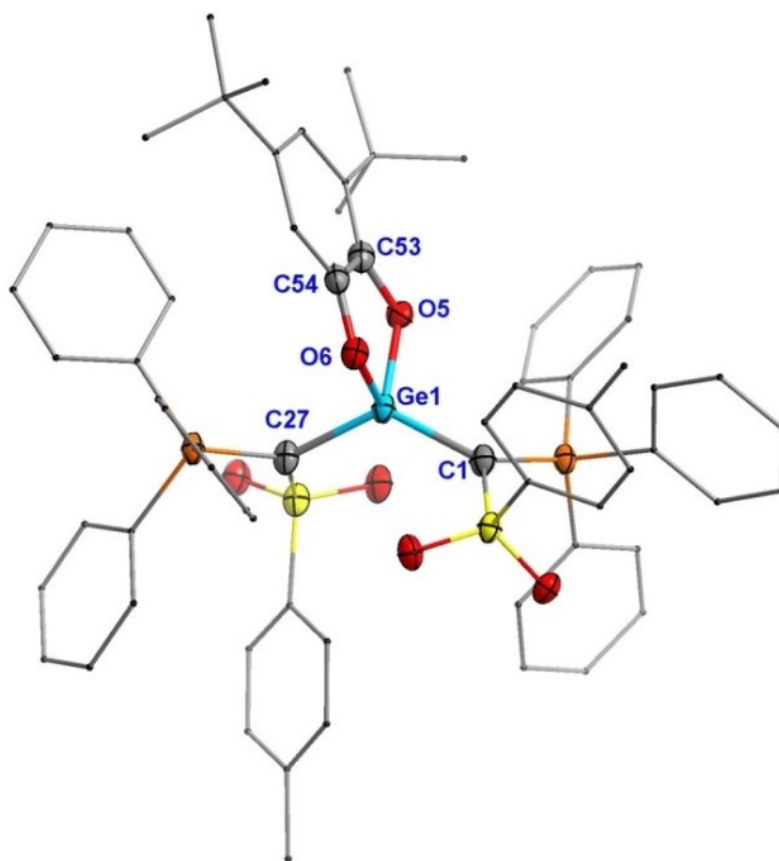

**Figure S28.** X-Ray structure of **5a**. Selected bond lengths [Å] and angles [°]: **5a**: Ge1-C1 1.899(3), Ge1-C27 1.919(3), Ge1-O6 1.845(2), Ge1-O5 1.842(2), C53-O5 1.373(3), C54-O6 1.344(4), C1-Ge1-C27 126.21(1), O5-Ge1-O6 90.23(1).

**Table S9.** Atomic coordinates ( $\times 10^4$ ) and equivalent isotropic displacement parameters ( $\text{Å}^2 \times 10^3$ ) for **5a**. U(eq) is defined as one third of the trace of the orthogonalized  $U_{ij}$  tensor.

| Atom | x       | y       | z       | U(eq) |
|------|---------|---------|---------|-------|
| Ge1  | 4643(1) | 3624(1) | 7641(1) | 19(1) |
| S1   | 4262(1) | 4634(1) | 6417(1) | 20(1) |
| S2   | 5435(1) | 4877(1) | 8399(1) | 22(1) |
| P1   | 6870(1) | 3637(1) | 6367(1) | 20(1) |
| P2   | 2781(1) | 4635(1) | 8906(1) | 21(1) |
| O1   | 4997(2) | 5130(1) | 5942(1) | 24(1) |
| O2   | 3241(2) | 5147(2) | 6882(1) | 26(1) |
| O3   | 6480(2) | 4455(2) | 7898(1) | 27(1) |
| O4   | 5698(2) | 4802(2) | 9018(1) | 28(1) |
| O5   | 5606(2) | 2531(1) | 7851(1) | 24(1) |
| O6   | 3214(2) | 3109(2) | 7725(1) | 26(1) |
| C1   | 5294(3) | 3903(2) | 6795(2) | 22(1) |
| C2   | 3460(3) | 4018(2) | 6008(2) | 21(1) |
| C3   | 2626(3) | 3497(2) | 6342(2) | 28(1) |

|     |         |         |          |       |
|-----|---------|---------|----------|-------|
| C4  | 2027(3) | 3011(2) | 6018(2)  | 30(1) |
| C5  | 2240(3) | 3037(2) | 5371(2)  | 28(1) |
| C6  | 3054(3) | 3591(2) | 5047(2)  | 29(1) |
| C7  | 3662(3) | 4080(2) | 5366(2)  | 26(1) |
| C8  | 1619(4) | 2482(3) | 5019(2)  | 40(1) |
| C9  | 6839(3) | 3274(2) | 5594(2)  | 27(1) |
| C10 | 6167(3) | 2591(2) | 5572(2)  | 32(1) |
| C11 | 6089(4) | 2288(3) | 4997(2)  | 44(1) |
| C12 | 6675(5) | 2669(3) | 4453(2)  | 53(1) |
| C13 | 7337(4) | 3347(3) | 4474(2)  | 47(1) |
| C14 | 7422(3) | 3659(2) | 5046(2)  | 32(1) |
| C15 | 7750(3) | 4549(2) | 6287(2)  | 24(1) |
| C16 | 7178(3) | 5372(2) | 6577(2)  | 26(1) |
| C17 | 7891(4) | 6046(2) | 6550(2)  | 32(1) |
| C18 | 9176(4) | 5895(3) | 6239(2)  | 37(1) |
| C19 | 9754(3) | 5076(3) | 5949(2)  | 40(1) |
| C20 | 9048(3) | 4398(2) | 5979(2)  | 32(1) |
| C21 | 7974(3) | 2715(2) | 6676(2)  | 25(1) |
| C22 | 8460(3) | 1892(2) | 6360(2)  | 32(1) |
| C23 | 9445(4) | 1266(3) | 6548(2)  | 37(1) |
| C24 | 9937(3) | 1437(2) | 7054(2)  | 35(1) |
| C25 | 9450(3) | 2247(3) | 7366(2)  | 33(1) |
| C26 | 8476(3) | 2887(2) | 7182(2)  | 31(1) |
| C27 | 4158(3) | 4451(2) | 8326(2)  | 22(1) |
| C28 | 5119(3) | 6062(2) | 8210(2)  | 26(1) |
| C29 | 4560(3) | 6359(2) | 7707(2)  | 26(1) |
| C30 | 4390(4) | 7271(2) | 7532(2)  | 32(1) |
| C31 | 4771(4) | 7884(3) | 7872(2)  | 38(1) |
| C32 | 5282(4) | 7576(3) | 8384(2)  | 41(1) |
| C33 | 5482(4) | 6659(3) | 8561(2)  | 35(1) |
| C34 | 4606(6) | 8873(3) | 7669(2)  | 57(1) |
| C35 | 2579(3) | 5726(2) | 9264(2)  | 21(1) |
| C36 | 1973(3) | 6521(2) | 9001(2)  | 29(1) |
| C37 | 1892(4) | 7355(2) | 9259(2)  | 34(1) |
| C38 | 2429(4) | 7396(2) | 9776(2)  | 33(1) |
| C39 | 3025(3) | 6613(2) | 10040(2) | 29(1) |
| C40 | 3106(3) | 5780(2) | 9789(2)  | 25(1) |
| C41 | 2731(3) | 3833(2) | 9552(2)  | 24(1) |
| C42 | 1730(3) | 4034(2) | 10084(2) | 29(1) |
| C43 | 1641(4) | 3410(2) | 10570(2) | 33(1) |
| C44 | 2537(4) | 2591(2) | 10532(2) | 35(1) |
| C45 | 3537(4) | 2407(2) | 10015(2) | 35(1) |
| C46 | 3644(3) | 3035(2) | 9528(2)  | 29(1) |
| C47 | 1367(3) | 4661(2) | 8577(2)  | 27(1) |
| C48 | 378(3)  | 4212(2) | 8849(2)  | 30(1) |
| C49 | -695(4) | 4305(3) | 8568(2)  | 42(1) |
| C50 | -772(4) | 4818(3) | 8038(2)  | 41(1) |
| C51 | 219(4)  | 5253(3) | 7763(2)  | 38(1) |



|     |         |          |         |       |
|-----|---------|----------|---------|-------|
| C52 | 1279(3) | 5175(3)  | 8036(2) | 30(1) |
| C53 | 4738(3) | 2013(2)  | 8132(2) | 24(1) |
| C54 | 3449(3) | 2343(2)  | 8062(2) | 25(1) |
| C55 | 2467(3) | 1905(2)  | 8352(2) | 26(1) |
| C56 | 2768(3) | 1127(2)  | 8705(2) | 28(1) |
| C57 | 4055(3) | 798(2)   | 8757(2) | 27(1) |
| C58 | 5065(3) | 1229(2)  | 8471(2) | 26(1) |
| C59 | 1672(3) | 673(2)   | 9049(2) | 36(1) |
| C60 | 698(5)  | 1353(3)  | 9493(3) | 61(1) |
| C61 | 970(5)  | 387(3)   | 8584(3) | 56(1) |
| C62 | 2159(4) | -173(3)  | 9413(3) | 57(1) |
| C63 | 6464(3) | 842(2)   | 8538(2) | 28(1) |
| C64 | 6977(3) | 1548(2)  | 8839(2) | 34(1) |
| C65 | 7307(3) | 608(2)   | 7888(2) | 33(1) |
| C66 | 6595(4) | -23(2)   | 8942(2) | 38(1) |
| C11 | 791(5)  | 501(4)   | 4636(4) | 78(2) |
| C21 | 1310(5) | -296(4)  | 4886(3) | 76(2) |
| C31 | 541(6)  | -811(4)  | 5251(4) | 80(2) |
| C12 | 4483(6) | 272(5)   | 4079(3) | 81(2) |
| C22 | 5751(6) | 84(4)    | 4133(3) | 77(2) |
| C32 | 6634(6) | -551(4)  | 3776(3) | 66(1) |
| C42 | 6249(6) | -1004(3) | 3340(3) | 65(1) |
| C52 | 4998(5) | -835(3)  | 3292(2) | 54(1) |
| C62 | 4109(6) | -215(4)  | 3650(3) | 64(1) |

**Table S10.** Anisotropic displacement parameters ( $\text{\AA}^2 \times 10^3$ ) for **5a**. The anisotropic displacement factor exponent takes the form:  $-2p^2[ h^2 a^{*2}U^{11} + \dots + 2 h k a^* b^* U^{12} ]$

| Atom | U <sup>11</sup> | U <sup>22</sup> | U <sup>33</sup> | U <sup>23</sup> | U <sup>13</sup> | U <sup>12</sup> |
|------|-----------------|-----------------|-----------------|-----------------|-----------------|-----------------|
| Ge1  | 17(1)           | 23(1)           | 18(1)           | -1(1)           | -2(1)           | -7(1)           |
| S1   | 17(1)           | 26(1)           | 18(1)           | -1(1)           | -2(1)           | -6(1)           |
| S2   | 16(1)           | 31(1)           | 21(1)           | -4(1)           | -3(1)           | -9(1)           |
| P1   | 17(1)           | 24(1)           | 19(1)           | -2(1)           | 0(1)            | -6(1)           |
| P2   | 17(1)           | 28(1)           | 18(1)           | -4(1)           | 0(1)            | -8(1)           |
| O1   | 22(1)           | 29(1)           | 21(1)           | 3(1)            | -3(1)           | -9(1)           |
| O2   | 20(1)           | 32(1)           | 23(1)           | -6(1)           | -3(1)           | -2(1)           |
| O3   | 14(1)           | 39(1)           | 27(1)           | -4(1)           | 0(1)            | -9(1)           |
| O4   | 26(1)           | 36(1)           | 23(1)           | -3(1)           | -6(1)           | -9(1)           |
| O5   | 19(1)           | 23(1)           | 28(1)           | -1(1)           | 0(1)            | -7(1)           |
| O6   | 25(1)           | 31(1)           | 21(1)           | -1(1)           | -2(1)           | -7(1)           |
| C1   | 18(1)           | 27(1)           | 23(2)           | -2(1)           | -2(1)           | -6(1)           |
| C2   | 15(1)           | 28(1)           | 20(2)           | 0(1)            | -4(1)           | -5(1)           |
| C3   | 26(2)           | 39(2)           | 22(2)           | 5(1)            | -4(1)           | -12(1)          |
| C4   | 25(2)           | 34(2)           | 33(2)           | 5(1)            | -8(1)           | -13(1)          |
| C5   | 23(2)           | 33(2)           | 32(2)           | -4(1)           | -9(1)           | -9(1)           |
| C6   | 30(2)           | 39(2)           | 21(2)           | -2(1)           | -7(1)           | -12(1)          |

|     |       |       |       |        |        |        |
|-----|-------|-------|-------|--------|--------|--------|
| C7  | 23(2) | 33(2) | 24(2) | 3(1)   | -3(1)  | -10(1) |
| C8  | 41(2) | 49(2) | 39(2) | -7(2)  | -11(2) | -21(2) |
| C9  | 26(2) | 27(2) | 25(2) | -7(1)  | -3(1)  | 1(1)   |
| C10 | 30(2) | 33(2) | 33(2) | -8(1)  | -6(2)  | -1(1)  |
| C11 | 48(2) | 38(2) | 50(3) | -21(2) | -20(2) | 2(2)   |
| C12 | 60(3) | 58(3) | 34(2) | -23(2) | -16(2) | 12(2)  |
| C13 | 48(2) | 56(2) | 25(2) | -9(2)  | -1(2)  | 12(2)  |
| C14 | 32(2) | 36(2) | 23(2) | 0(1)   | -1(2)  | 2(1)   |
| C15 | 20(1) | 31(2) | 24(2) | 4(1)   | -7(1)  | -8(1)  |
| C16 | 24(2) | 33(2) | 23(2) | -1(1)  | -4(1)  | -9(1)  |
| C17 | 36(2) | 33(2) | 31(2) | 0(1)   | -12(2) | -15(1) |
| C18 | 34(2) | 42(2) | 45(2) | 12(2)  | -20(2) | -22(2) |
| C19 | 22(2) | 47(2) | 52(3) | 10(2)  | -5(2)  | -16(2) |
| C20 | 21(2) | 34(2) | 39(2) | 1(1)   | 1(2)   | -8(1)  |
| C21 | 19(1) | 28(2) | 25(2) | 0(1)   | 1(1)   | -5(1)  |
| C22 | 29(2) | 29(2) | 36(2) | -2(1)  | -9(2)  | -2(1)  |
| C23 | 31(2) | 35(2) | 42(2) | -6(2)  | -3(2)  | -1(1)  |
| C24 | 24(2) | 38(2) | 40(2) | 5(2)   | -5(2)  | 0(1)   |
| C25 | 25(2) | 45(2) | 28(2) | 1(1)   | -6(1)  | -6(1)  |
| C26 | 22(2) | 36(2) | 33(2) | -3(1)  | -3(1)  | -4(1)  |
| C27 | 16(1) | 32(2) | 20(2) | -5(1)  | -2(1)  | -11(1) |
| C28 | 22(1) | 30(2) | 25(2) | -4(1)  | 1(1)   | -10(1) |
| C29 | 24(2) | 29(2) | 26(2) | -7(1)  | 2(1)   | -10(1) |
| C30 | 36(2) | 37(2) | 25(2) | -1(1)  | -2(2)  | -12(1) |
| C31 | 45(2) | 36(2) | 36(2) | -1(2)  | -3(2)  | -17(2) |
| C32 | 53(2) | 37(2) | 42(2) | -6(2)  | -12(2) | -24(2) |
| C33 | 38(2) | 43(2) | 32(2) | -2(2)  | -9(2)  | -21(2) |
| C34 | 83(4) | 39(2) | 55(3) | 1(2)   | -14(3) | -26(2) |
| C35 | 17(1) | 26(1) | 20(2) | -5(1)  | 0(1)   | -7(1)  |
| C36 | 26(2) | 40(2) | 23(2) | -2(1)  | -6(1)  | -10(1) |
| C37 | 35(2) | 29(2) | 39(2) | 0(1)   | -11(2) | -4(1)  |
| C38 | 39(2) | 28(2) | 34(2) | -6(1)  | -6(2)  | -8(1)  |
| C39 | 30(2) | 36(2) | 24(2) | -6(1)  | -4(1)  | -12(1) |
| C40 | 23(2) | 27(2) | 27(2) | -2(1)  | -3(1)  | -7(1)  |
| C41 | 24(2) | 32(2) | 17(2) | -3(1)  | -1(1)  | -13(1) |
| C42 | 25(2) | 33(2) | 29(2) | -4(1)  | 1(1)   | -10(1) |
| C43 | 30(2) | 43(2) | 25(2) | -1(1)  | 4(2)   | -13(1) |
| C44 | 43(2) | 38(2) | 28(2) | 7(1)   | -10(2) | -17(2) |
| C45 | 40(2) | 33(2) | 32(2) | -4(1)  | -9(2)  | -6(1)  |
| C46 | 27(2) | 35(2) | 24(2) | -8(1)  | -1(1)  | -8(1)  |
| C47 | 16(1) | 37(2) | 26(2) | -14(1) | 4(1)   | -9(1)  |
| C48 | 21(2) | 42(2) | 28(2) | -13(1) | 4(1)   | -13(1) |
| C49 | 24(2) | 55(2) | 49(3) | -18(2) | 4(2)   | -20(2) |
| C50 | 21(2) | 69(3) | 40(2) | -15(2) | -8(2)  | -17(2) |
| C51 | 24(2) | 62(2) | 30(2) | -7(2)  | -7(2)  | -10(2) |
| C52 | 16(1) | 53(2) | 23(2) | -9(1)  | -2(1)  | -11(1) |
| C53 | 23(2) | 30(2) | 22(2) | -6(1)  | -1(1)  | -12(1) |
| C54 | 25(2) | 28(2) | 22(2) | -7(1)  | 1(1)   | -9(1)  |

|     |       |       |        |        |        |        |
|-----|-------|-------|--------|--------|--------|--------|
| C55 | 20(1) | 32(2) | 30(2)  | -2(1)  | -6(1)  | -11(1) |
| C56 | 26(2) | 30(2) | 31(2)  | 0(1)   | -2(1)  | -14(1) |
| C57 | 30(2) | 23(1) | 29(2)  | 0(1)   | -4(1)  | -8(1)  |
| C58 | 25(2) | 26(2) | 28(2)  | -7(1)  | -4(1)  | -7(1)  |
| C59 | 28(2) | 38(2) | 44(2)  | 7(2)   | -4(2)  | -16(1) |
| C60 | 48(3) | 62(3) | 64(3)  | -1(2)  | 20(2)  | -24(2) |
| C61 | 47(2) | 58(3) | 73(3)  | 16(2)  | -20(2) | -32(2) |
| C62 | 40(2) | 64(3) | 70(3)  | 29(2)  | -7(2)  | -26(2) |
| C63 | 26(2) | 29(2) | 30(2)  | -2(1)  | -6(1)  | -8(1)  |
| C64 | 29(2) | 36(2) | 39(2)  | -3(2)  | -13(2) | -7(1)  |
| C65 | 27(2) | 34(2) | 37(2)  | -2(1)  | -2(2)  | -6(1)  |
| C66 | 33(2) | 37(2) | 46(2)  | 6(2)   | -13(2) | -7(1)  |
| C11 | 49(3) | 64(3) | 120(6) | -46(3) | -6(3)  | -12(2) |
| C21 | 45(3) | 62(3) | 123(6) | -46(3) | -22(3) | 0(2)   |
| C31 | 55(3) | 60(3) | 120(6) | -41(3) | -11(3) | 0(2)   |
| C12 | 66(4) | 85(4) | 83(5)  | -38(3) | 5(3)   | -6(3)  |
| C22 | 66(4) | 83(4) | 84(4)  | -45(3) | -9(3)  | -14(3) |
| C32 | 53(3) | 74(3) | 66(4)  | -23(3) | -11(3) | 1(2)   |
| C42 | 84(4) | 53(3) | 55(3)  | -15(2) | -25(3) | 4(3)   |
| C52 | 76(3) | 47(2) | 43(3)  | 1(2)   | -14(2) | -22(2) |
| C62 | 56(3) | 76(3) | 61(3)  | -8(3)  | -6(3)  | -19(3) |

---

## 2.6 Crystal Structure of 5b

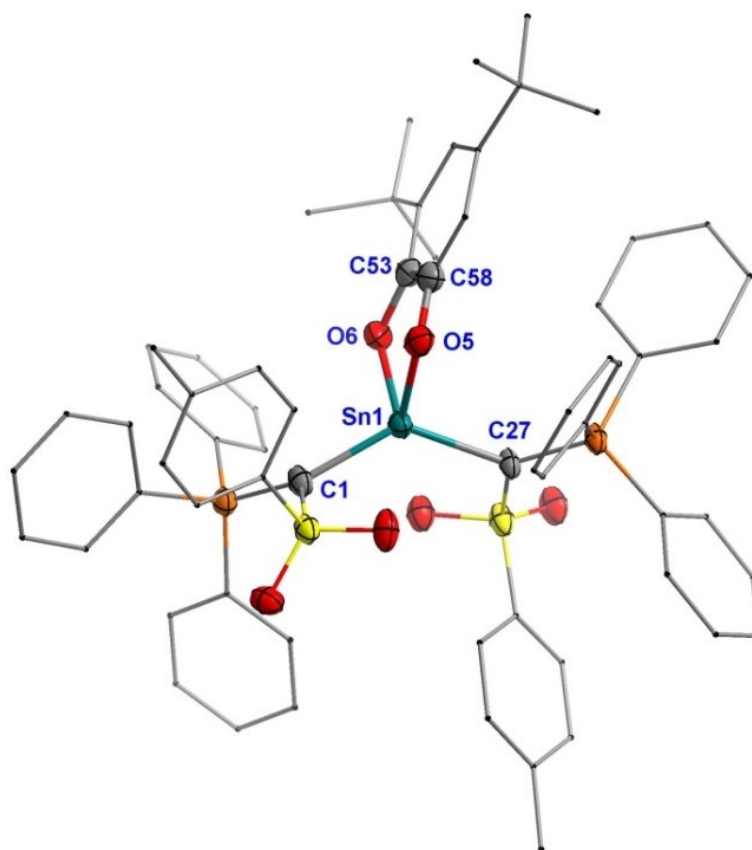

**Figure S29.** X-Ray structure of **5b**. Selected bond lengths [Å] and angles [°]: **5b**: Sn1-C1 2.082(3), Sn1-C27 2.091(3), Sn1-O6 2.041(3), Sn1-O5 2.064(3), C53-O6 1.387(4), C58-O5 1.340(4), C1-Sn1-C27 131.71(1), O5-Sn1-O6 83.72(1).

**Table S11.** Atomic coordinates ( $\times 10^4$ ) and equivalent isotropic displacement parameters ( $\text{Å}^2 \times 10^3$ ) for **5b**. U(eq) is defined as one third of the trace of the orthogonalized  $U_{ij}$  tensor.

| Atom | x       | y       | z       | U(eq) |
|------|---------|---------|---------|-------|
| Sn1  | 5282(1) | 6407(1) | 2381(1) | 25(1) |
| P1   | 3024(1) | 6408(1) | 3720(1) | 25(1) |
| S1   | 5710(1) | 5448(1) | 3616(1) | 26(1) |
| O1   | 5099(3) | 4854(2) | 4052(1) | 33(1) |
| C1   | 4577(3) | 6175(2) | 3302(1) | 26(1) |
| O3   | 3603(2) | 5595(2) | 2099(1) | 32(1) |
| C3   | 6332(4) | 5961(2) | 4669(2) | 30(1) |
| O4   | 4191(2) | 5194(2) | 997(1)  | 35(1) |
| C4   | 6945(4) | 6441(3) | 4990(2) | 36(1) |
| O5   | 6820(3) | 7060(2) | 2291(1) | 32(1) |
| C5   | 7735(4) | 7014(2) | 4692(2) | 36(1) |
| C6   | 7920(4) | 7074(3) | 4053(2) | 38(1) |
| O6   | 4307(3) | 7623(2) | 2122(1) | 35(1) |
| C7   | 7322(4) | 6594(3) | 3723(2) | 35(1) |
| C8   | 8370(5) | 7556(3) | 5042(2) | 50(1) |

|     |          |         |         |       |
|-----|----------|---------|---------|-------|
| C9  | 2154(3)  | 5493(2) | 3782(2) | 29(1) |
| C10 | 2732(4)  | 4697(2) | 3464(2) | 34(1) |
| C11 | 2020(4)  | 4030(3) | 3464(2) | 40(1) |
| C12 | 747(4)   | 4149(3) | 3779(2) | 45(1) |
| C14 | 871(4)   | 5612(3) | 4090(2) | 37(1) |
| C13 | 173(4)   | 4931(3) | 4090(2) | 46(1) |
| C15 | 1943(3)  | 7295(2) | 3392(2) | 29(1) |
| C16 | 1460(4)  | 7103(3) | 2884(2) | 38(1) |
| C17 | 535(4)   | 7732(3) | 2662(2) | 46(1) |
| C18 | 64(4)    | 8552(3) | 2938(2) | 47(1) |
| C19 | 523(5)   | 8751(3) | 3443(2) | 51(1) |
| C21 | 3078(4)  | 6764(2) | 4479(2) | 31(1) |
| C20 | 1467(4)  | 8132(3) | 3670(2) | 43(1) |
| C22 | 3747(4)  | 7457(3) | 4512(2) | 40(1) |
| C23 | 3849(5)  | 7748(3) | 5075(2) | 55(1) |
| C24 | 3296(5)  | 7350(4) | 5601(2) | 61(1) |
| C25 | 2650(5)  | 6673(3) | 5580(2) | 53(1) |
| C26 | 2534(4)  | 6366(3) | 5014(2) | 40(1) |
| C27 | 5894(3)  | 5545(2) | 1626(1) | 23(1) |
| C28 | 4854(4)  | 3971(3) | 1790(2) | 32(1) |
| C29 | 4526(4)  | 3360(3) | 1439(2) | 43(1) |
| C2  | 6520(3)  | 6048(2) | 4036(2) | 26(1) |
| O2  | 6702(3)  | 5048(2) | 3108(1) | 38(1) |
| S2  | 4573(1)  | 5136(1) | 1587(1) | 27(1) |
| P2  | 7259(1)  | 5361(1) | 1060(1) | 25(1) |
| C30 | 4725(5)  | 2455(3) | 1613(2) | 53(1) |
| C31 | 5210(5)  | 2166(3) | 2139(2) | 48(1) |
| C32 | 5535(4)  | 2798(3) | 2479(2) | 42(1) |
| C33 | 5379(4)  | 3698(2) | 2304(2) | 33(1) |
| C34 | 5390(7)  | 1184(3) | 2342(3) | 70(2) |
| C35 | 7448(3)  | 4277(2) | 710(2)  | 27(1) |
| C36 | 6871(4)  | 4211(2) | 204(2)  | 30(1) |
| C37 | 6946(4)  | 3377(3) | -37(2)  | 36(1) |
| C38 | 7585(4)  | 2607(3) | 218(2)  | 42(1) |
| C39 | 8150(5)  | 2667(3) | 720(2)  | 45(1) |
| C40 | 8078(4)  | 3499(3) | 971(2)  | 36(1) |
| C41 | 7304(4)  | 6155(2) | 428(2)  | 29(1) |
| C42 | 8243(4)  | 5948(3) | -106(2) | 36(1) |
| C43 | 8338(4)  | 6572(3) | -579(2) | 40(1) |
| C44 | 7490(4)  | 7407(3) | -519(2) | 41(1) |
| C45 | 6555(4)  | 7608(3) | 2(2)    | 41(1) |
| C46 | 6444(4)  | 6982(3) | 481(2)  | 35(1) |
| C47 | 8659(3)  | 5356(3) | 1404(2) | 31(1) |
| C48 | 8716(4)  | 4884(3) | 1955(2) | 39(1) |
| C49 | 9774(4)  | 4821(4) | 2235(2) | 49(1) |
| C50 | 10792(4) | 5225(4) | 1964(2) | 49(1) |
| C51 | 10741(4) | 5705(3) | 1427(2) | 50(1) |
| C52 | 9675(4)  | 5780(3) | 1136(2) | 39(1) |

|     |           |          |         |         |
|-----|-----------|----------|---------|---------|
| C53 | 5251(4)   | 8101(2)  | 1860(2) | 31(1)   |
| C54 | 4925(4)   | 8875(2)  | 1506(2) | 33(1)   |
| C55 | 5947(4)   | 9290(2)  | 1229(2) | 37(1)   |
| C56 | 7234(4)   | 8976(3)  | 1294(2) | 38(1)   |
| C57 | 7507(4)   | 8221(3)  | 1661(2) | 36(1)   |
| C58 | 6531(4)   | 7791(2)  | 1945(2) | 33(1)   |
| C59 | 3522(4)   | 9235(2)  | 1426(2) | 37(1)   |
| C60 | 2646(4)   | 9469(3)  | 2055(2) | 45(1)   |
| C61 | 3387(5)   | 10087(3) | 1025(2) | 50(1)   |
| C62 | 3028(4)   | 8525(3)  | 1114(2) | 44(1)   |
| C63 | 8352(4)   | 9414(3)  | 964(2)  | 49(1)   |
| C64 | 9299(6)   | 8737(4)  | 539(3)  | 76(2)   |
| C65 | 7866(6)   | 10236(4) | 595(3)  | 79(2)   |
| C66 | 9043(6)   | 9707(4)  | 1433(3) | 73(2)   |
| C11 | 5084(4)   | 840(3)   | 6724(2) | 67(2)   |
| C21 | 5987(3)   | 202(3)   | 6351(2) | 86(2)   |
| C31 | 5585(4)   | -269(3)  | 5927(2) | 116(3)  |
| C41 | 4282(5)   | -102(3)  | 5877(2) | 110(3)  |
| C51 | 3379(4)   | 536(3)   | 6250(2) | 92(2)   |
| C61 | 3780(4)   | 1008(3)  | 6673(2) | 79(2)   |
| C12 | 10614(13) | 9254(11) | 5319(8) | 170(20) |
| C22 | 9265(13)  | 9516(10) | 5431(7) | 220(30) |
| C32 | 8671(10)  | 10260(7) | 5128(6) | 76(9)   |
| C42 | 9428(11)  | 10742(7) | 4714(5) | 68(6)   |
| C52 | 10777(10) | 10480(8) | 4602(6) | 61(5)   |
| C62 | 11370(10) | 9736(11) | 4905(8) | 150(18) |

**Table S12.** Anisotropic displacement parameters ( $\text{\AA}^2 \times 10^3$ ) for **5b**. The anisotropic displacement factor exponent takes the form:  $-2p^2[h^2 a^{*2}U^{11} + \dots + 2hk a^* b^* U^{12}]$

| Atom | U <sup>11</sup> | U <sup>22</sup> | U <sup>33</sup> | U <sup>23</sup> | U <sup>13</sup> | U <sup>12</sup> |
|------|-----------------|-----------------|-----------------|-----------------|-----------------|-----------------|
| Sn1  | 30(1)           | 27(1)           | 17(1)           | -1(1)           | -2(1)           | -10(1)          |
| P1   | 28(1)           | 28(1)           | 19(1)           | -3(1)           | -2(1)           | -7(1)           |
| S1   | 29(1)           | 30(1)           | 18(1)           | -1(1)           | -4(1)           | -7(1)           |
| O1   | 40(1)           | 35(1)           | 28(1)           | 5(1)            | -11(1)          | -16(1)          |
| C1   | 29(2)           | 35(2)           | 17(2)           | -2(1)           | -4(1)           | -11(1)          |
| O3   | 29(1)           | 43(1)           | 27(1)           | -6(1)           | -4(1)           | -12(1)          |
| C3   | 35(2)           | 36(2)           | 20(2)           | 1(1)            | -2(1)           | -10(2)          |
| O4   | 34(1)           | 51(2)           | 24(1)           | -5(1)           | -8(1)           | -15(1)          |
| C4   | 42(2)           | 43(2)           | 24(2)           | -2(2)           | -8(2)           | -9(2)           |
| O5   | 43(1)           | 29(1)           | 25(1)           | -2(1)           | -12(1)          | -6(1)           |
| C5   | 39(2)           | 34(2)           | 38(2)           | -5(2)           | -13(2)          | -7(2)           |
| C6   | 40(2)           | 38(2)           | 42(2)           | 7(2)            | -12(2)          | -17(2)          |
| O6   | 39(1)           | 32(1)           | 33(1)           | -4(1)           | 6(1)            | -13(1)          |
| C7   | 39(2)           | 45(2)           | 24(2)           | 5(2)            | -6(2)           | -15(2)          |
| C8   | 58(3)           | 46(2)           | 52(3)           | -8(2)           | -16(2)          | -19(2)          |
| C9   | 32(2)           | 34(2)           | 24(2)           | 2(1)            | -6(1)           | -10(1)          |
| C10  | 39(2)           | 38(2)           | 27(2)           | -3(1)           | -8(2)           | -14(2)          |

|     |        |       |       |        |        |        |
|-----|--------|-------|-------|--------|--------|--------|
| C11 | 55(3)  | 38(2) | 35(2) | 2(2)   | -15(2) | -22(2) |
| C12 | 49(2)  | 47(2) | 51(2) | 15(2)  | -24(2) | -27(2) |
| C14 | 31(2)  | 42(2) | 36(2) | 4(2)   | -2(2)  | -11(2) |
| C13 | 30(2)  | 59(3) | 53(3) | 16(2)  | -8(2)  | -20(2) |
| C15 | 23(2)  | 35(2) | 27(2) | 2(1)   | 0(1)   | -7(1)  |
| C16 | 38(2)  | 42(2) | 31(2) | -2(2)  | -6(2)  | -4(2)  |
| C17 | 42(2)  | 60(3) | 31(2) | 4(2)   | -7(2)  | -3(2)  |
| C18 | 39(2)  | 51(2) | 47(2) | 10(2)  | -6(2)  | -1(2)  |
| C19 | 53(3)  | 33(2) | 62(3) | -2(2)  | -10(2) | 1(2)   |
| C21 | 37(2)  | 34(2) | 21(2) | -7(1)  | -2(1)  | -4(2)  |
| C20 | 44(2)  | 37(2) | 47(2) | -6(2)  | -12(2) | -7(2)  |
| C22 | 45(2)  | 37(2) | 38(2) | -12(2) | -9(2)  | -5(2)  |
| C23 | 63(3)  | 50(2) | 54(3) | -24(2) | -24(2) | -1(2)  |
| C24 | 72(3)  | 68(3) | 38(2) | -29(2) | -23(2) | 14(3)  |
| C25 | 61(3)  | 63(3) | 25(2) | -5(2)  | -4(2)  | 12(2)  |
| C26 | 42(2)  | 46(2) | 24(2) | -2(2)  | -3(2)  | 1(2)   |
| C27 | 22(2)  | 34(2) | 15(1) | -6(1)  | 0(1)   | -12(1) |
| C28 | 33(2)  | 43(2) | 23(2) | -8(1)  | 1(1)   | -18(2) |
| C29 | 53(3)  | 51(2) | 33(2) | -4(2)  | -10(2) | -29(2) |
| C2  | 26(2)  | 32(2) | 23(2) | 1(1)   | -7(1)  | -8(1)  |
| O2  | 34(1)  | 52(2) | 26(1) | -13(1) | -5(1)  | -5(1)  |
| S2  | 25(1)  | 39(1) | 19(1) | -5(1)  | -3(1)  | -13(1) |
| P2  | 26(1)  | 34(1) | 17(1) | -6(1)  | -1(1)  | -12(1) |
| C30 | 76(3)  | 47(2) | 47(2) | -4(2)  | -15(2) | -36(2) |
| C31 | 65(3)  | 43(2) | 41(2) | -2(2)  | -3(2)  | -28(2) |
| C32 | 51(2)  | 47(2) | 29(2) | 1(2)   | -3(2)  | -18(2) |
| C33 | 39(2)  | 36(2) | 25(2) | -8(1)  | -1(2)  | -11(2) |
| C34 | 106(5) | 46(3) | 68(3) | 7(2)   | -21(3) | -33(3) |
| C35 | 29(2)  | 34(2) | 20(2) | -6(1)  | 0(1)   | -10(1) |
| C36 | 35(2)  | 35(2) | 21(2) | -3(1)  | -4(1)  | -13(1) |
| C37 | 46(2)  | 39(2) | 28(2) | -5(2)  | -10(2) | -15(2) |
| C38 | 55(3)  | 34(2) | 40(2) | -7(2)  | -12(2) | -12(2) |
| C39 | 60(3)  | 34(2) | 43(2) | -1(2)  | -17(2) | -6(2)  |
| C40 | 40(2)  | 39(2) | 29(2) | -1(2)  | -10(2) | -10(2) |
| C41 | 33(2)  | 35(2) | 23(2) | -5(1)  | -2(1)  | -14(1) |
| C42 | 39(2)  | 39(2) | 29(2) | -2(2)  | 1(2)   | -14(2) |
| C43 | 46(2)  | 51(2) | 25(2) | -1(2)  | 2(2)   | -23(2) |
| C44 | 55(3)  | 43(2) | 31(2) | 5(2)   | -11(2) | -23(2) |
| C45 | 53(2)  | 37(2) | 35(2) | -3(2)  | -11(2) | -7(2)  |
| C46 | 41(2)  | 41(2) | 26(2) | -7(2)  | -5(2)  | -13(2) |
| C47 | 24(2)  | 44(2) | 25(2) | -16(2) | 0(1)   | -12(2) |
| C48 | 31(2)  | 62(2) | 25(2) | -9(2)  | -4(2)  | -14(2) |
| C49 | 37(2)  | 83(3) | 30(2) | -9(2)  | -9(2)  | -17(2) |
| C50 | 33(2)  | 81(3) | 38(2) | -21(2) | -6(2)  | -17(2) |
| C51 | 31(2)  | 72(3) | 50(3) | -20(2) | -1(2)  | -24(2) |
| C52 | 35(2)  | 51(2) | 33(2) | -15(2) | 4(2)   | -21(2) |
| C53 | 40(2)  | 31(2) | 24(2) | -6(1)  | -4(2)  | -15(2) |
| C54 | 43(2)  | 29(2) | 29(2) | -4(1)  | -10(2) | -10(2) |

|     |         |         |         |          |          |         |
|-----|---------|---------|---------|----------|----------|---------|
| C55 | 45(2)   | 32(2)   | 36(2)   | 5(2)     | -12(2)   | -13(2)  |
| C56 | 45(2)   | 38(2)   | 37(2)   | 1(2)     | -6(2)    | -20(2)  |
| C57 | 38(2)   | 41(2)   | 31(2)   | 1(2)     | -9(2)    | -14(2)  |
| C58 | 42(2)   | 32(2)   | 26(2)   | -2(1)    | -6(2)    | -11(2)  |
| C59 | 42(2)   | 31(2)   | 39(2)   | 0(2)     | -13(2)   | -9(2)   |
| C60 | 47(2)   | 36(2)   | 51(2)   | -6(2)    | -10(2)   | -6(2)   |
| C61 | 49(3)   | 42(2)   | 64(3)   | 10(2)    | -23(2)   | -12(2)  |
| C62 | 45(2)   | 44(2)   | 47(2)   | -4(2)    | -18(2)   | -10(2)  |
| C63 | 46(2)   | 46(2)   | 58(3)   | 18(2)    | -9(2)    | -22(2)  |
| C64 | 63(3)   | 83(4)   | 77(4)   | 2(3)     | 15(3)    | -30(3)  |
| C65 | 61(3)   | 79(4)   | 101(5)  | 50(4)    | -14(3)   | -35(3)  |
| C66 | 65(3)   | 73(3)   | 95(4)   | 16(3)    | -25(3)   | -44(3)  |
| C11 | 107(5)  | 55(3)   | 44(3)   | -2(2)    | -8(3)    | -31(3)  |
| C21 | 84(5)   | 92(5)   | 82(4)   | -7(4)    | -9(4)    | -25(4)  |
| C31 | 103(6)  | 121(7)  | 115(6)  | -63(6)   | -16(5)   | 6(5)    |
| C41 | 101(6)  | 110(6)  | 124(7)  | -67(5)   | -25(5)   | -17(5)  |
| C51 | 89(5)   | 93(5)   | 95(5)   | -38(4)   | -29(4)   | 3(4)    |
| C61 | 108(5)  | 63(3)   | 67(4)   | -24(3)   | -39(4)   | 7(3)    |
| C12 | 100(30) | 130(30) | 280(50) | -60(30)  | -60(30)  | 60(20)  |
| C22 | 120(30) | 130(30) | 440(60) | -140(30) | -140(30) | 10(20)  |
| C32 | 38(9)   | 48(9)   | 150(20) | -67(12)  | -43(12)  | 18(8)   |
| C42 | 69(14)  | 55(10)  | 82(10)  | -50(8)   | -10(9)   | -13(9)  |
| C52 | 63(11)  | 42(8)   | 70(8)   | -35(6)   | 10(7)    | -10(7)  |
| C62 | 120(20) | 160(30) | 180(30) | -30(20)  | 20(20)   | -90(20) |

---



## 2.7 Crystal Structure of 6

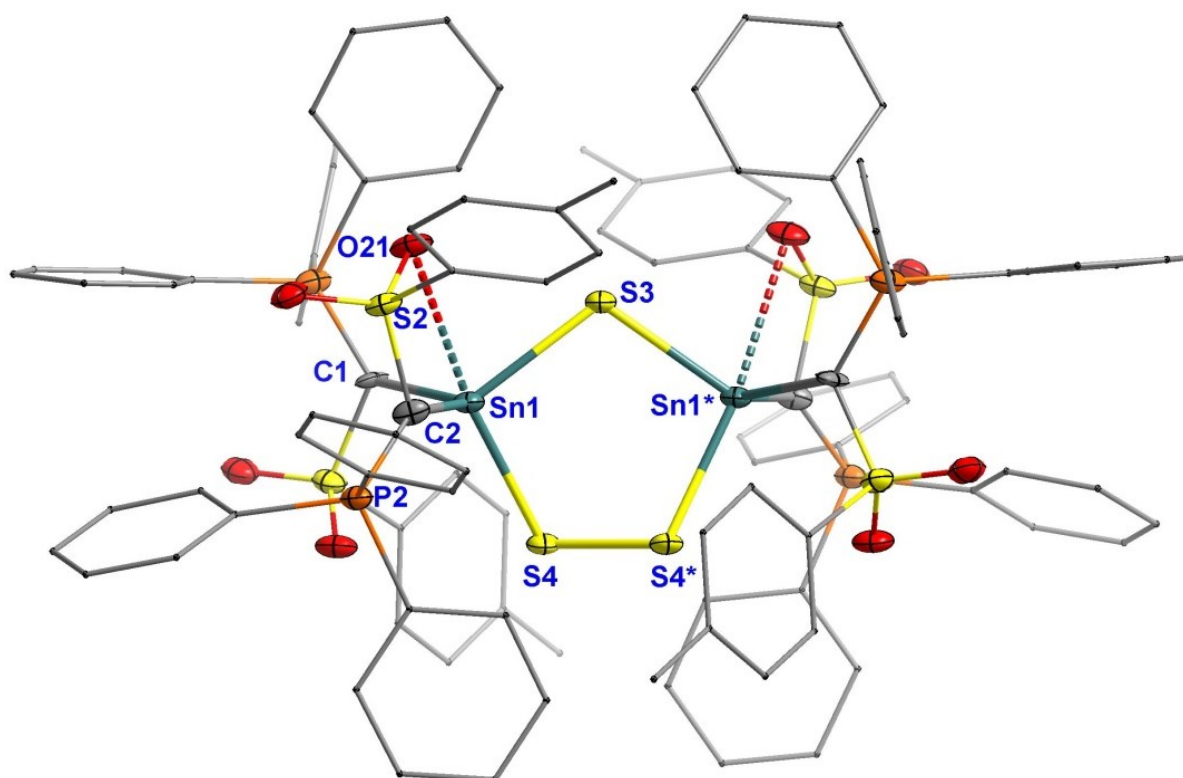

**Figure S30.** X-ray structure of **6**. Selected bond lengths [Å] and angles [°]: **6**: Sn1-C1 2.144(8), Sn1-C2 2.125(8), Sn1-S3 2.417(2), Sn1-S4 2.432(2), S4-S4\* 2.043(5), Sn1-O21 2.761(6), C1-Sn1-C2 115.1(4), S3-Sn1-S4 98.41(8).

### Mean plane of Sn<sub>2</sub>S<sub>3</sub> core of **6**.

|      | Distance from the mean plane (Å) |
|------|----------------------------------|
| Sn1  | -0.2155                          |
| S4   | 0.4577                           |
| S4*  | -0.4577                          |
| Sn1* | 0.2155                           |
| S3   | 0.0000                           |

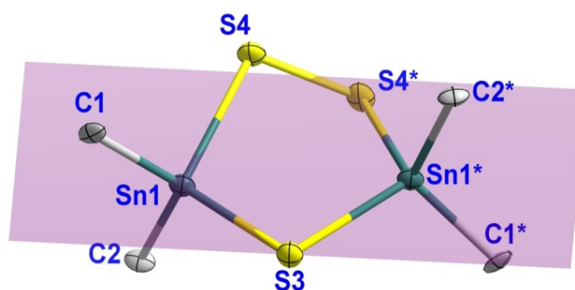

**Figure S31.** (left) Mean Plane data for 5-membered ring of **6**. (right) The mean plane passing through the Sn<sub>2</sub>S<sub>3</sub> core of **6**.

**Table S13.** Atomic coordinates ( $\times 10^4$ ) and equivalent isotropic displacement parameters ( $\text{\AA}^2 \times 10^3$ ) for **6**.  $U(\text{eq})$  is defined as one third of the trace of the orthogonalized  $U_{ij}$  tensor.

| Atom | x         | y          | z         | U(eq)     |
|------|-----------|------------|-----------|-----------|
| Sn1  | 5394.1(2) | 6990.8(5)  | 3046.1(2) | 16.05(17) |
| P1   | 6401.6(8) | 5431(2)    | 3169.0(9) | 20.4(5)   |
| S1   | 6336.7(8) | 8061(2)    | 3139.0(8) | 20.5(5)   |
| C1   | 6083(3)   | 6720(7)    | 3073(3)   | 16.9(18)  |
| S2   | 5095.8(8) | 5612.6(19) | 3883.4(8) | 20.2(5)   |
| P2   | 5069.8(8) | 8142(2)    | 4111.3(8) | 18.8(5)   |
| C2   | 5116(3)   | 7053(8)    | 3691(3)   | 16.9(18)  |
| C3   | 6411(3)   | 8732(9)    | 2594(3)   | 25(2)     |
| S3   | 5000      | 5700(3)    | 2500      | 19.0(6)   |
| C4   | 6509(3)   | 8617(10)   | 1791(4)   | 30(2)     |
| S4   | 5314.2(8) | 8889.8(19) | 2630.7(8) | 21.2(5)   |
| C5   | 6564(3)   | 9867(10)   | 1771(4)   | 31(2)     |
| C6   | 6639(4)   | 10500(12)  | 1324(4)   | 44(3)     |
| C62A | 8149(10)  | 3410(40)   | 5781(7)   | 95(4)     |
| C63A | 7842(9)   | 3570(40)   | 5381(9)   | 95(4)     |
| O64A | 7421(9)   | 3400(30)   | 5569(5)   | 95(4)     |
| C62B | 8154(17)  | 4380(50)   | 5897(14)  | 95(4)     |
| C63B | 7881(16)  | 4120(70)   | 5482(17)  | 95(4)     |
| O64B | 7445(17)  | 3920(40)   | 5629(10)  | 95(4)     |
| C61  | 7930(6)   | 3620(20)   | 6213(6)   | 95(4)     |
| C60  | 7486(6)   | 3270(20)   | 6061(6)   | 95(4)     |
| C7   | 6539(3)   | 10538(10)  | 2169(4)   | 30(2)     |
| C8   | 6460(3)   | 9984(9)    | 2578(3)   | 24(2)     |
| C9   | 6827(3)   | 5146(9)    | 2770(3)   | 23(2)     |
| C10  | 7103(3)   | 6045(9)    | 2630(4)   | 26(2)     |
| O10  | 6052(2)   | 8890(6)    | 3360(2)   | 24.5(15)  |
| C11  | 7408(3)   | 5799(10)   | 2315(4)   | 29(2)     |
| O11  | 6769(2)   | 7923(6)    | 3348(2)   | 25.7(15)  |
| C12  | 7449(3)   | 4640(10)   | 2140(4)   | 28(2)     |
| C14  | 6871(3)   | 3982(9)    | 2591(4)   | 28(2)     |
| C13  | 7180(3)   | 3743(9)    | 2286(4)   | 30(2)     |
| C16  | 5818(3)   | 3953(9)    | 2704(4)   | 31(2)     |
| C15  | 6073(3)   | 4085(8)    | 3108(4)   | 25(2)     |
| C17  | 5586(4)   | 2886(11)   | 2627(5)   | 43(3)     |
| C18  | 5615(4)   | 1972(11)   | 2951(6)   | 53(4)     |
| C19  | 5883(4)   | 2096(10)   | 3343(5)   | 48(4)     |
| C20  | 6105(4)   | 3151(10)   | 3427(4)   | 36(3)     |
| O20  | 5295(2)   | 5459(6)    | 4341(2)   | 26.2(15)  |
| C21  | 6677(4)   | 5362(10)   | 3738(4)   | 32(2)     |
| O21  | 5275(2)   | 4879(6)    | 3525(2)   | 26.7(15)  |
| C22  | 7107(4)   | 5255(16)   | 3814(5)   | 55(4)     |
| C23  | 7285(5)   | 5210(20)   | 4255(5)   | 87(7)     |
| C24  | 7034(5)   | 5225(16)   | 4621(5)   | 58(4)     |
| C25  | 6595(4)   | 5333(10)   | 4545(4)   | 41(3)     |
| C26  | 6412(3)   | 5386(9)    | 4107(4)   | 29(2)     |

|     |         |          |         |          |
|-----|---------|----------|---------|----------|
| C27 | 6426(3) | 8050(9)  | 2198(3) | 25(2)    |
| C28 | 4544(3) | 5140(8)  | 3918(3) | 22(2)    |
| C29 | 4253(4) | 5308(9)  | 3548(4) | 28(2)    |
| C30 | 3831(4) | 4908(10) | 3571(4) | 32(2)    |
| C31 | 3696(4) | 4304(10) | 3966(4) | 33(2)    |
| C32 | 3240(4) | 3901(13) | 4003(5) | 50(3)    |
| C33 | 4003(4) | 4142(9)  | 4322(4) | 32(2)    |
| C34 | 4422(4) | 4556(9)  | 4309(4) | 30(2)    |
| C35 | 4609(3) | 7778(8)  | 4451(3) | 19.8(19) |
| C36 | 4656(3) | 7223(9)  | 4873(3) | 25(2)    |
| C37 | 4293(4) | 6924(9)  | 5108(4) | 31(2)    |
| C38 | 3885(4) | 7184(9)  | 4919(4) | 31(2)    |
| C39 | 3835(4) | 7705(10) | 4491(4) | 33(2)    |
| C40 | 4195(3) | 8002(10) | 4259(4) | 29(2)    |
| C41 | 4957(3) | 9623(8)  | 3868(3) | 19.7(19) |
| C42 | 5126(3) | 10673(8) | 4084(3) | 22(2)    |
| C43 | 4981(4) | 11789(9) | 3931(3) | 28(2)    |
| C44 | 4678(4) | 11888(9) | 3564(3) | 29(2)    |
| C45 | 4529(3) | 10855(9) | 3341(3) | 26(2)    |
| C46 | 4660(3) | 9731(8)  | 3490(3) | 19.9(19) |
| C47 | 5538(3) | 8342(8)  | 4512(3) | 21(2)    |
| C48 | 5948(3) | 8061(9)  | 4365(3) | 26(2)    |
| C49 | 6312(4) | 8298(9)  | 4650(4) | 30(2)    |
| C50 | 6273(4) | 8806(10) | 5078(4) | 36(3)    |
| C51 | 5872(4) | 9082(9)  | 5224(4) | 31(2)    |
| C52 | 5503(3) | 8866(9)  | 4944(3) | 25(2)    |

**Table S14.** Anisotropic displacement parameters ( $\text{\AA}^2 \times 10^3$ ) for **6**. The anisotropic displacement factor exponent takes the form:  $-2p^2 [ h^2 a^{*2} U^{11} + \dots + 2 h k a^* b^* U^{12} ]$

| Atom | U <sup>11</sup> | U <sup>22</sup> | U <sup>33</sup> | U <sup>23</sup> | U <sup>13</sup> | U <sup>12</sup> |
|------|-----------------|-----------------|-----------------|-----------------|-----------------|-----------------|
| Sn1  | 19.7(3)         | 9.3(3)          | 19.3(3)         | 0.3(2)          | 2.4(2)          | 0.6(2)          |
| P1   | 16.3(11)        | 13.3(11)        | 32.0(13)        | 2.8(9)          | 5.0(9)          | 1.4(9)          |
| S1   | 26.8(12)        | 12.5(10)        | 22.6(11)        | 0.5(8)          | 3.5(9)          | -4.1(9)         |
| C1   | 11(4)           | 6(4)            | 33(5)           | 4(3)            | 1(4)            | 3(3)            |
| S2   | 26.4(12)        | 11.1(10)        | 23.6(11)        | 3.6(8)          | 5.7(9)          | 4.5(9)          |
| P2   | 26.3(12)        | 11.8(10)        | 18.6(11)        | 0.4(8)          | 3.4(9)          | 1.1(9)          |
| C2   | 18(4)           | 14(4)           | 20(4)           | 2(3)            | 11(3)           | 3(4)            |
| C3   | 27(5)           | 19(5)           | 27(5)           | 3(4)            | 4(4)            | -7(4)           |
| S3   | 23.3(16)        | 10.2(13)        | 23.2(15)        | 0               | -2.1(12)        | 0               |
| C4   | 25(5)           | 39(6)           | 24(5)           | -1(4)           | 4(4)            | 0(5)            |
| S4   | 27.9(12)        | 9.9(10)         | 25.4(11)        | 1.8(8)          | -1.5(9)         | -3.1(9)         |
| C5   | 23(5)           | 36(6)           | 35(6)           | 10(5)           | 1(4)            | -6(5)           |
| C6   | 47(7)           | 49(7)           | 35(6)           | 14(6)           | 3(5)            | -8(6)           |
| C62A | 100(7)          | 124(10)         | 62(5)           | -6(6)           | 5(5)            | 43(8)           |
| C63A | 100(7)          | 124(10)         | 62(5)           | -6(6)           | 5(5)            | 43(8)           |

|      |        |         |         |        |       |        |
|------|--------|---------|---------|--------|-------|--------|
| O64A | 100(7) | 124(10) | 62(5)   | -6(6)  | 5(5)  | 43(8)  |
| C62B | 100(7) | 124(10) | 62(5)   | -6(6)  | 5(5)  | 43(8)  |
| C63B | 100(7) | 124(10) | 62(5)   | -6(6)  | 5(5)  | 43(8)  |
| O64B | 100(7) | 124(10) | 62(5)   | -6(6)  | 5(5)  | 43(8)  |
| C61  | 100(7) | 124(10) | 62(5)   | -6(6)  | 5(5)  | 43(8)  |
| C60  | 100(7) | 124(10) | 62(5)   | -6(6)  | 5(5)  | 43(8)  |
| C7   | 28(5)  | 23(5)   | 37(6)   | 7(4)   | 1(4)  | -5(4)  |
| C8   | 26(5)  | 16(5)   | 28(5)   | 0(4)   | 0(4)  | -3(4)  |
| C9   | 15(5)  | 22(5)   | 31(5)   | 3(4)   | 2(4)  | 5(4)   |
| C10  | 19(5)  | 23(5)   | 36(6)   | -3(4)  | 0(4)  | 4(4)   |
| O10  | 33(4)  | 11(3)   | 30(4)   | -2(3)  | 9(3)  | 0(3)   |
| C11  | 14(5)  | 31(6)   | 42(6)   | -3(5)  | 6(4)  | -1(4)  |
| O11  | 35(4)  | 16(3)   | 27(4)   | 1(3)   | 3(3)  | -7(3)  |
| C12  | 24(5)  | 28(5)   | 32(5)   | -2(4)  | 7(4)  | 1(4)   |
| C14  | 19(5)  | 18(5)   | 48(6)   | 4(4)   | 7(4)  | 6(4)   |
| C13  | 28(6)  | 20(5)   | 43(6)   | 0(4)   | 5(5)  | 12(4)  |
| C16  | 26(5)  | 18(5)   | 50(7)   | -6(4)  | 8(5)  | 5(4)   |
| C15  | 16(5)  | 11(4)   | 49(6)   | 1(4)   | 10(4) | 4(4)   |
| C17  | 31(6)  | 27(6)   | 73(9)   | -24(6) | 13(6) | -4(5)  |
| C18  | 36(7)  | 17(6)   | 110(12) | -21(7) | 35(8) | -12(5) |
| C19  | 42(7)  | 13(5)   | 92(11)  | 7(6)   | 31(7) | 7(5)   |
| C20  | 39(6)  | 22(5)   | 50(7)   | 4(5)   | 19(5) | 3(5)   |
| O20  | 34(4)  | 16(3)   | 28(4)   | 7(3)   | 1(3)  | 3(3)   |
| C21  | 39(6)  | 25(5)   | 31(6)   | 9(4)   | 1(5)  | 2(5)   |
| O21  | 37(4)  | 13(3)   | 31(4)   | 1(3)   | 9(3)  | 8(3)   |
| C22  | 22(6)  | 101(12) | 42(7)   | 24(7)  | 6(5)  | 6(7)   |
| C23  | 46(9)  | 180(20) | 37(8)   | 24(11) | -4(7) | 13(11) |
| C24  | 51(8)  | 88(12)  | 35(7)   | 17(7)  | -6(6) | 17(8)  |
| C25  | 63(8)  | 28(6)   | 31(6)   | 7(5)   | 12(6) | 7(6)   |
| C26  | 26(5)  | 15(5)   | 46(6)   | 3(4)   | 9(5)  | 4(4)   |
| C27  | 26(5)  | 21(5)   | 28(5)   | -4(4)  | 3(4)  | 5(4)   |
| C28  | 26(5)  | 10(4)   | 29(5)   | -4(4)  | 10(4) | 2(4)   |
| C29  | 35(6)  | 21(5)   | 30(5)   | 1(4)   | 4(4)  | -5(4)  |
| C30  | 30(6)  | 30(6)   | 37(6)   | -7(5)  | 4(5)  | -1(5)  |
| C31  | 36(6)  | 21(5)   | 44(6)   | -12(5) | 12(5) | -3(5)  |
| C32  | 42(7)  | 45(8)   | 65(9)   | -8(6)  | 15(6) | -15(6) |
| C33  | 46(7)  | 16(5)   | 36(6)   | -1(4)  | 19(5) | -6(5)  |
| C34  | 48(7)  | 14(5)   | 28(5)   | 1(4)   | 10(5) | 9(4)   |
| C35  | 25(5)  | 14(4)   | 21(5)   | -3(3)  | 7(4)  | 1(4)   |
| C36  | 29(5)  | 20(5)   | 26(5)   | 3(4)   | 5(4)  | 3(4)   |
| C37  | 51(7)  | 19(5)   | 26(5)   | 4(4)   | 13(5) | 6(5)   |
| C38  | 36(6)  | 19(5)   | 40(6)   | 3(4)   | 16(5) | 1(4)   |
| C39  | 24(5)  | 34(6)   | 42(6)   | 7(5)   | 5(5)  | 1(5)   |
| C40  | 30(5)  | 27(5)   | 31(5)   | 4(4)   | 3(4)  | -5(5)  |
| C41  | 24(5)  | 16(4)   | 19(5)   | -1(4)  | 3(4)  | 2(4)   |
| C42  | 31(5)  | 15(4)   | 19(5)   | -4(4)  | 2(4)  | 6(4)   |
| C43  | 42(6)  | 16(5)   | 26(5)   | -4(4)  | 4(4)  | -3(4)  |
| C44  | 42(6)  | 15(5)   | 30(5)   | 3(4)   | 5(4)  | 7(4)   |

|     |       |       |       |       |        |       |
|-----|-------|-------|-------|-------|--------|-------|
| C45 | 30(5) | 24(5) | 24(5) | 0(4)  | 2(4)   | 2(4)  |
| C46 | 22(5) | 14(4) | 24(5) | -5(4) | 3(4)   | 0(4)  |
| C47 | 32(5) | 12(4) | 20(5) | 2(3)  | 1(4)   | 3(4)  |
| C48 | 34(6) | 17(5) | 27(5) | -2(4) | 2(4)   | 1(4)  |
| C49 | 26(5) | 26(5) | 39(6) | 3(4)  | -1(4)  | 2(4)  |
| C50 | 40(7) | 33(6) | 33(6) | -6(5) | -10(5) | -7(5) |
| C51 | 41(6) | 23(5) | 28(5) | 1(4)  | -4(5)  | 2(5)  |
| C52 | 27(5) | 21(5) | 28(5) | -1(4) | 4(4)   | 2(4)  |

### 3. VT-NMR studies

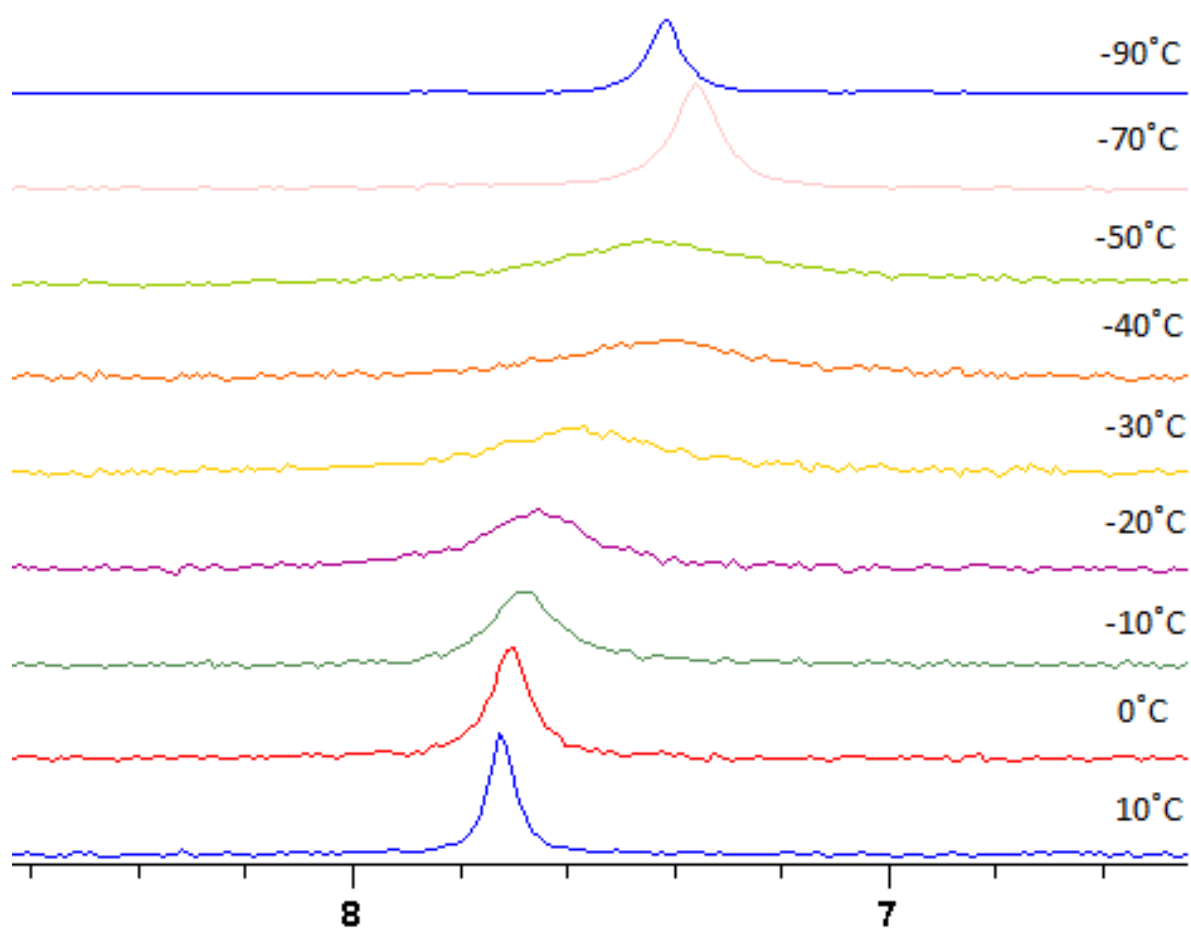

**Figure S32.**  $^{31}\text{P}\{^1\text{H}\}$  NMR spectra of  $\text{Y}_2\text{Ge}$  at different temperatures.

## 4. Computational Studies

**General.** All calculations were performed without symmetry restrictions. Starting coordinates for were obtained from the crystal structure analyses, via GaussView<sup>[3]</sup> or from Ref 3. The geometry optimization were done with the Gaussian09 (Revision E.01) program package,<sup>[4]</sup> using Density-Functional Theory (DFT)<sup>[5]</sup> with the PBE0 functional<sup>[6]</sup> and the def2svp basis set<sup>[7]</sup> with Grimme's D3 dispersion correction with Becke-Johnson damping<sup>[8]</sup>. For Tin, the LANL2DZdp basis set<sup>[9]</sup> with the corresponding ECP<sup>[10]</sup> was used. Single point energies were determined using the def2tzvp basis set<sup>[7]</sup> and the Polarizable Continuum Model (PCM) using the integral equation formalism variant (IEFPCM)<sup>[11]</sup> as implemented in Gaussian09 with the parameters of toluene for the reaction mechanism. The energies for the GaCl<sub>3</sub> adducts are reported at the def2svp level. The metrical parameters of the energy-optimized geometry compared well with those determined by X-ray diffraction. Harmonic vibrational frequency analysis was performed on the same levels of theory to determine the nature of the structure.<sup>[12]</sup> The vibrational frequency analysis showed no imaginary frequencies for the ground states and one imaginary frequency for transition states, corresponding to the expected translational motion of the transition states. The NBO analysis<sup>[13]</sup> was done with the PBE0 functional and the def2svp basis set.

### 4.1. Calculations of the electronic structure

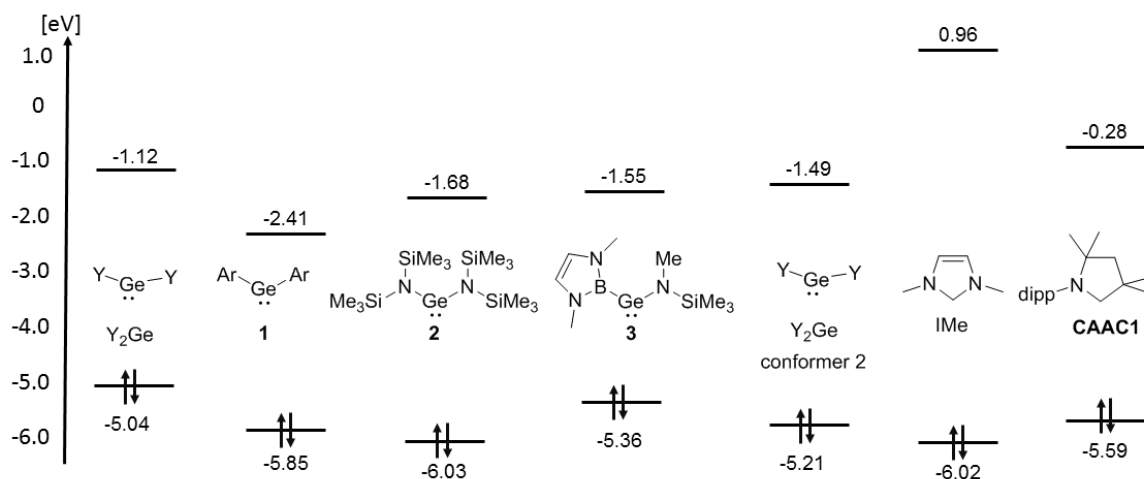

**Figure S33.** Comparison of the HOMO-LUMO energies of different tetrylenes (Ar = 2,6-dimethylphenyl).

**Table S15.** Comparison of the bonding situations in the tetrylenes depicted in Figure S33. Calculated Wiberg bond indices (WBI) and charges (q).

|                        | Y <sub>2</sub> Ge | Y <sub>2</sub> Ge<br>(conf. 2) | <b>1</b> | <b>2</b> | <b>3</b>        | Y <sub>2</sub> Sn | IMe      | CAAC     |
|------------------------|-------------------|--------------------------------|----------|----------|-----------------|-------------------|----------|----------|
| q(E)                   | 0.99991           | 0.93761                        | 0.99118  | 1.21711  | 0.65558         | 1.23001           |          |          |
| q(X) <sup>a</sup>      | -1.47428          | -1.45640                       | -0.51771 | -1.74373 | -1.25901<br>(N) | -1.55027          |          |          |
| q(X) <sup>a</sup>      | -1.49535          | -1.47219                       | -0.51772 | -1.76221 | 0.40763 (B)     | -1.55704          |          |          |
| WBI(Ge-X)              | 0.5384            | 0.7441                         | 0.7307   | 0.6755   | 0.8662 (N)      | 0.4471            |          |          |
| WBI(Ge-X)              | 0.6158            | 0.8657                         | 0.7307   | 0.6075   | 0.9809 (B)      | 0.4267            |          |          |
| HOMO [E <sub>h</sub> ] | -0.18538          | -0.19139                       | -0.21509 | -0.22144 | -0.19712        | -0.18748          | -0.22113 | -0.20541 |
| LUMO [E <sub>h</sub> ] | -0.04108          | -0.05463                       | -0.08839 | -0.06156 | -0.05713        | -0.03740          | 0.03528  | -0.01025 |

[a] X corresponds to the atom bond to the central element Sn or Ge, i.e. C for ylides, N for amino, B for boryl groups.

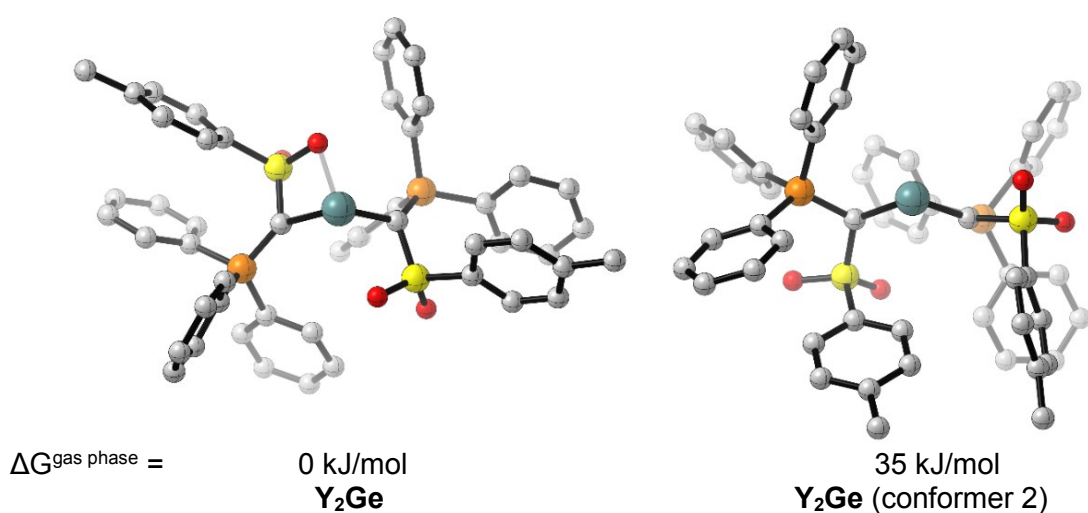

**Figure S34.** Structures and relative energies of the energy-optimized geometries of Y<sub>2</sub>Ge and its conformer 2.

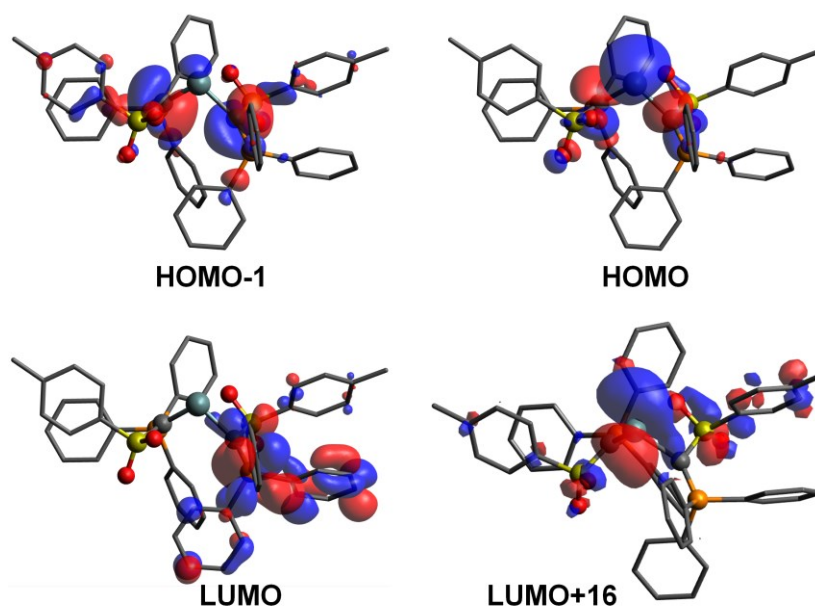

**Figure S35.** Molecular orbitals of Y<sub>2</sub>Ge.

#### 4.2. Calculations of the sum of angles in the GaCl<sub>3</sub> complexes and correlation with the Tolman electronic parameter

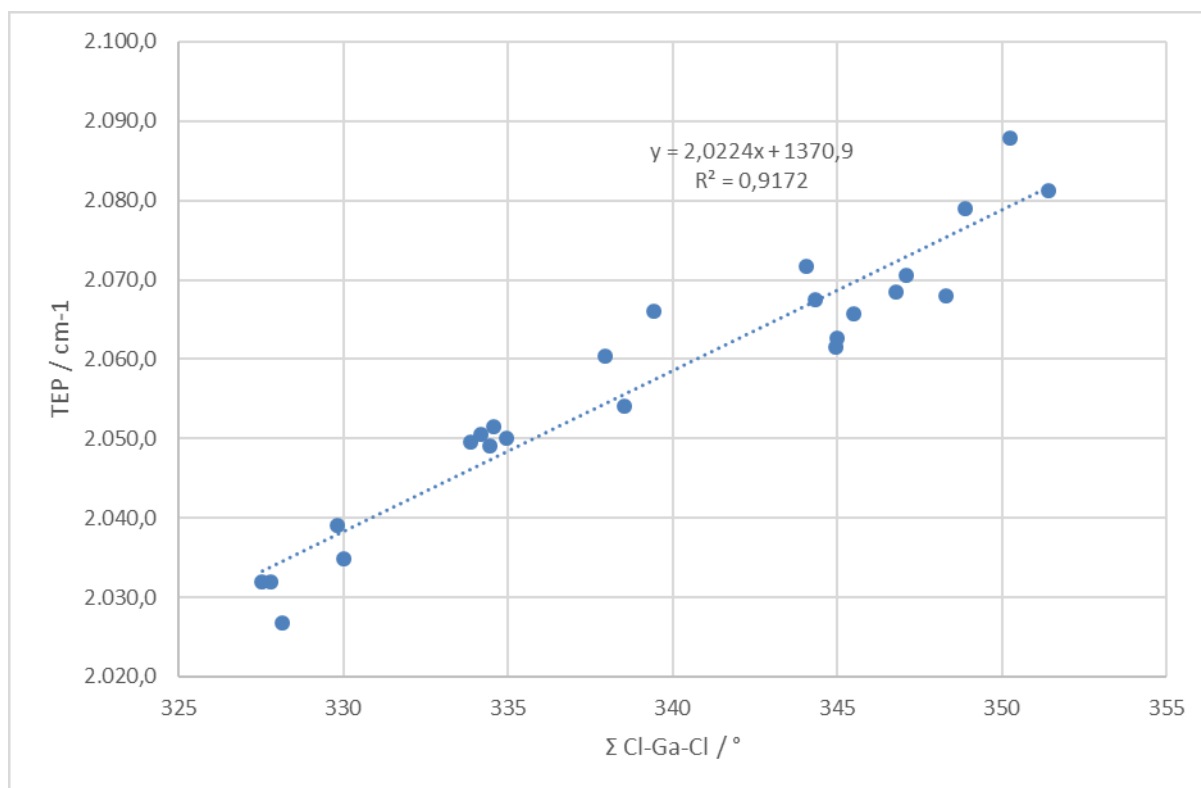

**Figure S36.** Correlation between the sum of Cl-Ga-Cl angles in L·GaCl<sub>3</sub> and its correlation with the TEP value.

**Table S16.** Calculated sum of Cl-Ga-Cl angles in L·GaCl<sub>3</sub> and corresponding TEP values (experimental or calculated). Structures of the compounds are given in Figure S36.

| Compound                         | Σ(Cl-Ga-Cl) [°] | TEP [cm <sup>-1</sup> ] <sup>a</sup> |
|----------------------------------|-----------------|--------------------------------------|
| Y <sub>2</sub> Ge                | 327.038         | 2032.3*                              |
| <b>2</b>                         | 339.389         | 2057.3*                              |
| <b>3</b>                         | 338.676         | 2055.8*                              |
| tBuPCl <sub>2</sub>              | 350.239         | 2,087.9                              |
| THF                              | 351.404         | 2,081.2                              |
| Me <sub>3</sub> PO               | 344.075         | 2,071.7                              |
| 3,5-Me <sub>2</sub> Py           | 346.794         | 2,068.5                              |
| DMAP                             | 345.492         | 2,065.8                              |
| <i>i</i> Pr <sub>2</sub> NH      | 339.431         | 2,066.0                              |
| PEt <sub>3</sub>                 | 345.017         | 2,062.7                              |
| IMe                              | 338.543         | 2,054.1                              |
| IPrMe <sub>2</sub>               | 333.878         | 2,049.6                              |
| Me <sub>3</sub> SiN <sub>3</sub> | 348.891         | 2,079.0                              |



|                               |         |         |
|-------------------------------|---------|---------|
| N <sub>3</sub> P <sub>2</sub> | 347.102 | 2,070.6 |
| Piperidine                    | 348.306 | 2,068.0 |
| PPh <sub>3</sub>              | 344.350 | 2,067.5 |
| PPr <sub>3</sub>              | 344.950 | 2,061.6 |
| N <sub>2</sub> B              | 337.949 | 2,060.4 |
| SIPr                          | 334.581 | 2,051.5 |
| IPr                           | 334.189 | 2,050.5 |
| CAAC1                         | 334.973 | 2,050.0 |
| CAAC2                         | 334.463 | 2,049.0 |
| Bisylide1                     | 329.828 | 2,039.0 |
| Bisylide2                     | 330.035 | 2,034.9 |
| Bisylide3                     | 327.807 | 2,032.0 |
| Bisylide4                     | 327.546 | 2,031.9 |
| Bisylide5                     | 328.135 | 2,026.7 |

a. Taken from Ref 14; \*) calculated from correlation.

Bisylides:

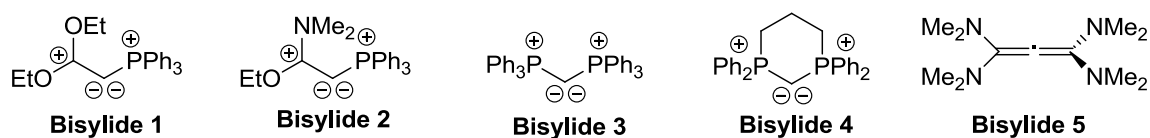

CAACs:

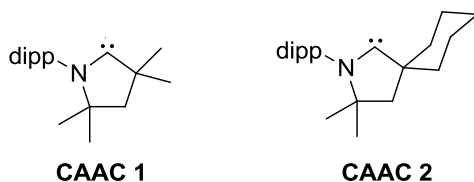

others:

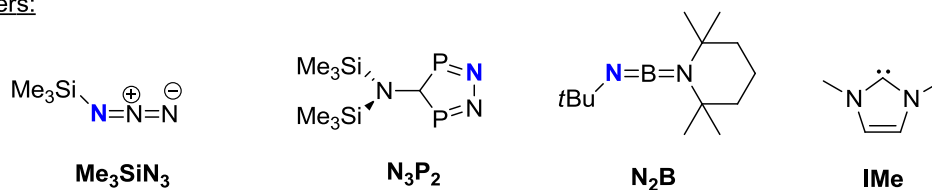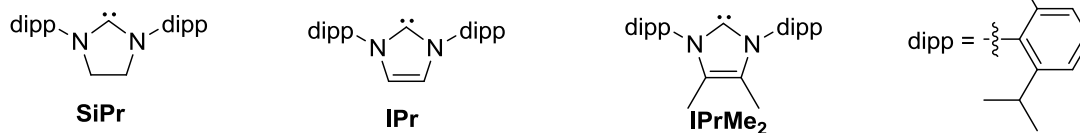

**Figure S37.** Structures of the compounds used for correlation of the sum of Cl-Ga-Cl angles with the TEP. Coordinating atom is highlighted in blue; central carbon atom for bisylides, CAACs and NHCs.

## 4.3. Mechanism of the C-H activation to 4

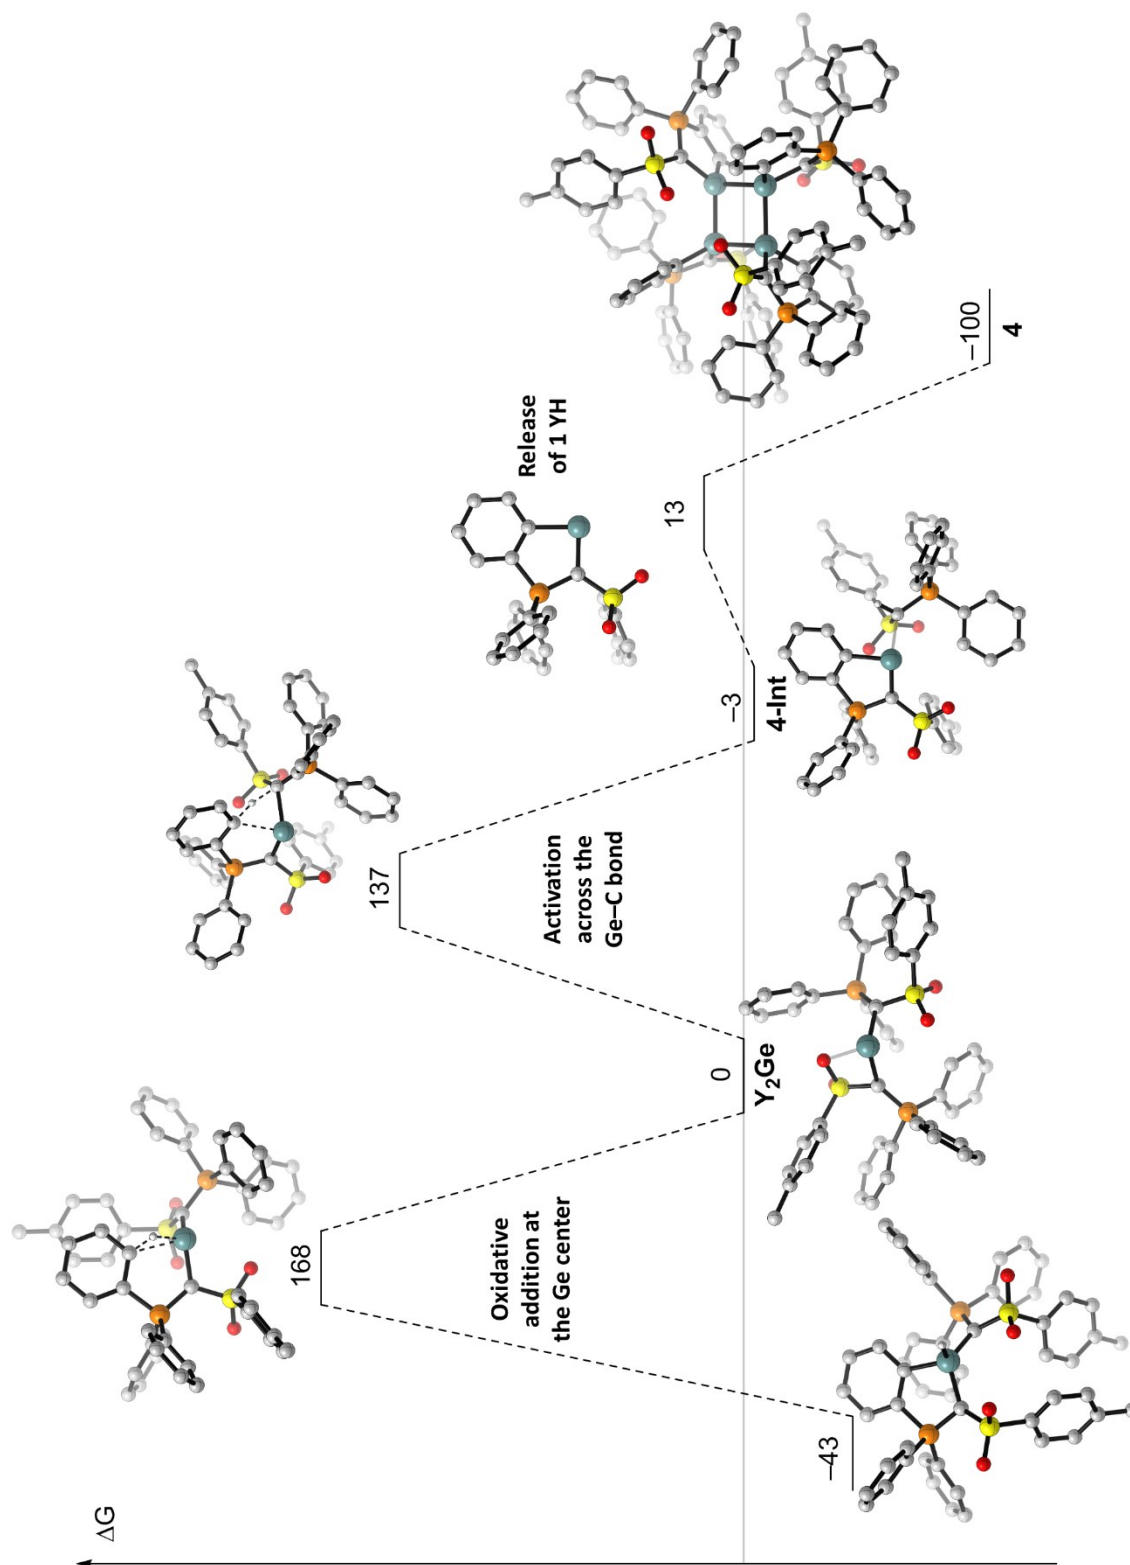

**Figure S38.** Structures and free energies in toluene [kJ/mol] for the calculated mechanism of the C-H activation in  $Y_2Ge$  to **4**.

**Table S17.** Overview of computed energies and vibrations.

|                               | E(SCF(Tot)) / E <sub>h</sub> | E <sub>corr,ZPE</sub> / E <sub>h</sub> | E <sub>corr,ΔH</sub> / E <sub>h</sub> | E <sub>corr,ΔG</sub> / E <sub>h</sub> | #(im. freq.) | v / cm <sup>-1</sup> |
|-------------------------------|------------------------------|----------------------------------------|---------------------------------------|---------------------------------------|--------------|----------------------|
| <b>Y<sub>2</sub>Ge</b>        | -5862.53686482               | 0.825638                               | 0.883264                              | 0.726147                              | 0            | -                    |
| <b>Y<sub>2</sub>Ge(conf2)</b> | -5862.51616200 <sup>a)</sup> | 0.826676                               | 0.883892                              | 0.730073                              | 0            | -                    |
| <b>Y</b>                      | -1893.47112149               | 0.422266                               | 0.450263                              | 0.361257                              | 0            | -                    |
| <b>TS(OA)</b>                 | -5862.47220966               | 0.821066                               | 0.877895                              | 0.725534                              | 1            | -1160.2612           |
| <b>OA</b>                     | -5862.55838736               | 0.824818                               | 0.881146                              | 0.731219                              | 0            | -                    |
| <b>TS(Ge-C)</b>               | -5862.48254787               | 0.821019                               | 0.878000                              | 0.723978                              | 1            | -1076.9138           |
| <b>4-Int</b>                  | -5862.53999092               | 0.825608                               | 0.882839                              | 0.728143                              | 0            | -                    |
| <b>Rel(Y-H)</b>               | -3969.03680298               | 0.401600                               | 0.430355                              | 0.340843                              | 0            | -                    |
| <b>4</b>                      | -15876.4010296               | 1.612615                               | 1.729042                              | 1.445507                              | 0            | -                    |

a) Gas phase.

## 4.4. Coordinates and Energies

Germynes and Stannynes

Energies are given in E<sub>hartree</sub> (gas phase) and coordinates in Å.

### Y<sub>2</sub>Ge

E = -5862.52550258

Ge 0.166093 0.013406 -1.722986

S -1.673644 1.395027 -0.141769

S 2.342459 -1.506429 -0.449325

P -2.483901 -1.433578 0.196892

P 2.300594 1.172427 0.717894

O -0.578880 1.948821 -1.047839

O -1.670971 1.916876 1.233280

O 1.371294 -2.254090 -1.309352

O 2.657678 -2.093992 0.869791

C -1.456097 -0.232384 -0.421796

C -4.027146 -0.712669 0.826051

C -4.003321 0.015433 2.023811

H -3.077370 0.106211 2.594797

C -5.156983 0.657840 2.463888

H -5.135099 1.224513 3.397483

C -6.327684 0.593433 1.709101

H -7.228703 1.105885 2.054758

C -6.346088 -0.112115 0.507177

H -7.257647 -0.151494 -0.093284

C -5.199780 -0.767487 0.064925

H -5.211943 -1.318347 -0.878060

C -2.937648 -2.629599 -1.091787

C -2.701510 -2.320886 -2.433339

H -2.202827 -1.381860 -2.684581

C -3.077810 -3.222323 -3.427915

H -2.878871 -2.985964 -4.475556

C -3.694987 -4.423300 -3.084521

H -3.988336 -5.129058 -3.865481

C -3.927742 -4.734183 -1.743337

H -4.401572 -5.680952 -1.474112

C -3.543510 -3.843714 -0.745903

H -3.705130 -4.094989 0.305555

C -1.801090 -2.458480 1.537682

C -2.521640 -2.818975 2.682904

H -3.559314 -2.501344 2.807271

C -1.903752 -3.580316 3.674723  
H -2.464194 -3.858527 4.570616  
C -0.573078 -3.974537 3.529677  
H -0.088528 -4.553824 4.319566  
C 0.139106 -3.627103 2.381977  
H 1.187409 -3.903605 2.253310  
C -0.477528 -2.883203 1.381109  
H 0.085962 -2.625018 0.480967  
C -3.201358 1.973170 -0.867102  
C -3.517536 1.608268 -2.175467  
H -2.819006 0.996300 -2.751681  
C -4.723635 2.022120 -2.723144  
H -4.975104 1.736743 -3.748448  
C -5.627792 2.799116 -1.981179  
C -5.274984 3.165908 -0.679790  
H -5.962941 3.776346 -0.088477  
C -4.064623 2.761996 -0.118635  
H -3.781178 3.035389 0.898882  
C -6.948184 3.199942 -2.570212  
H -7.426528 3.997759 -1.985028  
H -7.642881 2.343717 -2.595589  
H -6.835874 3.554345 -3.606001  
C 1.724638 0.053971 -0.429266  
C 1.941581 2.846521 0.126510  
C 1.297534 3.787541 0.931769  
H 1.005133 3.529480 1.950603  
C 0.978223 5.039584 0.411114  
H 0.460430 5.768329 1.038842  
C 1.294755 5.352608 -0.908513  
H 1.034426 6.332927 -1.315023  
C 1.920144 4.405784 -1.719734  
H 2.143797 4.638285 -2.763383  
C 2.234669 3.151831 -1.208447  
H 2.668168 2.384636 -1.854903  
C 4.101886 1.009370 0.964804  
C 5.004442 1.645117 0.104693  
H 4.641953 2.334732 -0.659354  
C 6.370330 1.405329 0.223167  
H 7.067545 1.904098 -0.453822  
C 6.844856 0.532410 1.201370  
H 7.917466 0.344649 1.292401  
C 5.949211 -0.104952 2.057465  
H 6.315279 -0.797379 2.819154  
C 4.580585 0.124727 1.939179  
H 3.878211 -0.402554 2.586357  
C 1.608179 1.016940 2.390191  
C 2.131220 1.714447 3.487198  
H 2.980185 2.391313 3.356968  
C 1.576177 1.528114 4.749608  
H 1.981502 2.069536 5.607769  
C 0.511508 0.639014 4.920505  
H 0.087142 0.486338 5.916088  
C -0.002152 -0.058332 3.829978  
H -0.823177 -0.767845 3.958622  
C 0.542452 0.136289 2.562498  
H 0.152714 -0.392693 1.692128  
C 3.893714 -1.495418 -1.340370  
C 3.952711 -0.901306 -2.601412  
H 3.047186 -0.478272 -3.045406  
C 5.168834 -0.840651 -3.267553

H 5.218440 -0.374878 -4.255985  
C 6.338664 -1.362609 -2.691860  
C 6.246378 -1.965089 -1.435045  
H 7.145189 -2.380155 -0.970721  
C 5.030010 -2.039396 -0.757335  
H 4.948439 -2.497638 0.229356  
C 7.654077 -1.248484 -3.405070  
H 8.418755 -1.891740 -2.947417  
H 8.029735 -0.212000 -3.375127  
H 7.562410 -1.527478 -4.465885

**Y<sub>2</sub>Ge(not coordinated)**

E = -5862.51616200  
Ge -0.169485 -0.107247 1.404336  
S -1.144482 -0.637436 -1.701007  
S 2.857029 -0.055263 1.791484  
P -3.082985 0.097508 0.230951  
P 2.129025 1.698893 -0.341865  
O -0.001251 -0.034206 -2.403045  
O -2.447626 -0.674523 -2.406048  
O 2.414827 -0.058400 3.194043  
O 4.082570 0.687896 1.433214  
C -1.397138 0.052702 -0.150901  
C -4.119883 1.288587 -0.674338  
C -3.664200 1.932031 -1.825542  
H -2.677704 1.698667 -2.222993  
C -4.483460 2.862045 -2.463166  
H -4.124391 3.361686 -3.365704  
C -5.750255 3.149502 -1.959554  
H -6.388670 3.877036 -2.466836  
C -6.203178 2.512675 -0.803143  
H -7.192026 2.741718 -0.399306  
C -5.387628 1.588626 -0.157175  
H -5.735489 1.103722 0.759312  
C -3.922010 -1.514153 0.168868  
C -5.036120 -1.757098 -0.638023  
H -5.462724 -0.949173 -1.235320  
C -5.579671 -3.038787 -0.698033  
H -6.445119 -3.229648 -1.336774  
C -5.018012 -4.075372 0.047117  
H -5.448545 -5.078446 -0.002808  
C -3.896196 -3.837196 0.840810  
H -3.436057 -4.651791 1.404200  
C -3.338167 -2.563309 0.890538  
H -2.427631 -2.385541 1.471759  
C -3.214443 0.698749 1.944681  
C -3.760351 -0.051790 2.987229  
H -4.151796 -1.052763 2.798442  
C -3.797886 0.476726 4.277590  
H -4.218562 -0.117780 5.091639  
C -3.297087 1.751192 4.529733  
H -3.320799 2.156985 5.543730  
C -2.769533 2.512557 3.485871  
H -2.383430 3.516123 3.677729  
C -2.732590 1.992183 2.197314  
H -2.332543 2.587898 1.373556  
C -0.695063 -2.348546 -1.463566  
C -1.621546 -3.344739 -1.749731  
H -2.605514 -3.063764 -2.129457  
C -1.272335 -4.678243 -1.539646

H -2.002684 -5.462571 -1.757101  
C -0.009327 -5.026830 -1.053064  
C 0.910208 -4.000395 -0.791072  
H 1.905508 -4.243799 -0.416982  
C 0.580685 -2.668290 -0.997626  
H 1.308148 -1.879562 -0.792447  
C 0.375721 -6.459074 -0.823025  
H 0.763869 -6.606358 0.197213  
H 1.171996 -6.771476 -1.518481  
H -0.476946 -7.137735 -0.965352  
C 1.565819 0.467399 0.747148  
C 3.386541 1.119026 -1.520858  
C 3.019579 0.170681 -2.486667  
H 1.972119 -0.128654 -2.587460  
C 3.996399 -0.394141 -3.304244  
H 3.704458 -1.129977 -4.057190  
C 5.335284 -0.034654 -3.153323  
H 6.099505 -0.486871 -3.790438  
C 5.700450 0.894795 -2.179523  
H 6.750105 1.165339 -2.044069  
C 4.732207 1.470602 -1.360892  
H 5.024520 2.162152 -0.570099  
C 2.815689 3.164033 0.516457  
C 3.305217 4.225515 -0.253395  
H 3.339664 4.143374 -1.343162  
C 3.738227 5.395245 0.364618  
H 4.126466 6.217372 -0.241165  
C 3.664497 5.518104 1.752106  
H 4.000168 6.437581 2.237856  
C 3.159086 4.468526 2.516890  
H 3.099762 4.559376 3.603878  
C 2.737106 3.289885 1.904820  
H 2.356835 2.465857 2.512201  
C 0.789452 2.544920 -1.231491  
C 0.791522 2.715342 -2.614927  
H 1.532038 2.204612 -3.230814  
C -0.162538 3.536826 -3.214125  
H -0.157336 3.664357 -4.298860  
C -1.115613 4.188423 -2.436240  
H -1.858822 4.836017 -2.907388  
C -1.121268 4.016334 -1.051316  
H -1.869834 4.525162 -0.439482  
C -0.168766 3.202118 -0.450922  
H -0.146412 3.094322 0.636100  
C 3.241775 -1.761394 1.412092  
C 2.824169 -2.766554 2.278646  
H 2.218696 -2.499580 3.147226  
C 3.216970 -4.080401 2.035408  
H 2.898749 -4.871354 2.720266  
C 4.022932 -4.404551 0.937272  
C 4.428485 -3.370021 0.081711  
H 5.064454 -3.599537 -0.777594  
C 4.050529 -2.051749 0.314363  
H 4.396854 -1.246580 -0.336633  
C 4.407186 -5.827798 0.657505  
H 5.382345 -5.892326 0.153776  
H 3.666396 -6.310287 -0.003500  
H 4.455560 -6.422415 1.580991

**Y<sub>2</sub>Sn**

E = -3789.18347324  
Sn -0.058075 -0.041811 -1.757576  
S 1.995861 1.381539 -0.159445  
S -2.158912 -1.454347 -0.125205  
P 2.561951 -1.441629 0.469977  
P -2.477026 1.377746 0.582662  
O 0.869178 2.012171 -0.954204  
O 2.148637 1.869963 1.226312  
O -1.086147 -2.164677 -0.918587  
O -2.401514 -1.946806 1.245921  
C 1.727318 -0.243960 -0.399817  
C 4.355832 -1.136225 0.552732  
C 4.824855 0.008898 1.214161  
H 4.124936 0.662760 1.741139  
C 6.175840 0.338552 1.155898  
H 6.531169 1.240918 1.658215  
C 7.065821 -0.465396 0.444418  
H 8.124337 -0.198484 0.395642  
C 6.603740 -1.607700 -0.206652  
H 7.297869 -2.241299 -0.763782  
C 5.252452 -1.944111 -0.155159  
H 4.891065 -2.833598 -0.676075  
C 1.989616 -1.731132 2.171460  
C 2.817944 -1.712700 3.297599  
H 3.890950 -1.539798 3.191482  
C 2.264025 -1.917650 4.561967  
H 2.908839 -1.897476 5.443933  
C 0.895182 -2.147437 4.700800  
H 0.467840 -2.301253 5.694817  
C 0.072232 -2.178190 3.574210  
H -1.003226 -2.348822 3.655362  
C 0.618176 -1.969976 2.313386  
H -0.034446 -1.989429 1.439662  
C 2.339074 -3.029821 -0.373111  
C 2.414187 -4.227513 0.345884  
H 2.566077 -4.206350 1.427654  
C 2.275583 -5.443743 -0.317404  
H 2.327397 -6.377810 0.246547  
C 2.056279 -5.467851 -1.694591  
H 1.935774 -6.423346 -2.210721  
C 1.979543 -4.274823 -2.411401  
H 1.794582 -4.290338 -3.487693  
C 2.124890 -3.055963 -1.754302  
H 2.058219 -2.115793 -2.306582  
C 3.510248 1.900958 -0.965644  
C 4.031234 1.171922 -2.030575  
H 3.496903 0.286769 -2.383492  
C 5.242181 1.556248 -2.594505  
H 5.659460 0.972493 -3.419614  
C 5.943769 2.669570 -2.113314  
C 5.386528 3.398617 -1.056004  
H 5.916265 4.274268 -0.670425  
C 4.179277 3.019513 -0.476547  
H 3.759056 3.563141 0.371622  
C 7.274586 3.043217 -2.696792  
H 8.065691 2.370349 -2.325435  
H 7.560433 4.070184 -2.429184  
H 7.270466 2.962515 -3.794128  
C -1.726779 0.144821 -0.305362  
C -2.290499 2.924166 -0.348629

C -2.415217 2.876948 -1.742771  
H -2.610535 1.919064 -2.231535  
C -2.261124 4.037315 -2.495618  
H -2.350691 3.993649 -3.583429  
C -1.973738 5.246131 -1.862770  
H -1.841763 6.154730 -2.455135  
C -1.837706 5.292464 -0.476536  
H -1.594088 6.234805 0.019340  
C -1.993257 4.134803 0.282327  
H -1.858695 4.169192 1.365157  
C -4.253327 1.054074 0.824774  
C -5.184177 1.431483 -0.149442  
H -4.867301 2.030901 -1.005578  
C -6.515750 1.044235 -0.028757  
H -7.237019 1.340328 -0.793848  
C -6.925902 0.281695 1.064255  
H -7.971612 -0.021279 1.157123  
C -5.999983 -0.101274 2.032786  
H -6.315462 -0.708707 2.884312  
C -4.664382 0.275028 1.913712  
H -3.933426 -0.054121 2.654468  
C -1.816722 1.678290 2.245517  
C -0.541780 1.186490 2.519414  
H -0.002410 0.634121 1.750130  
C 0.038269 1.411586 3.766038  
H 1.041994 1.029295 3.961097  
C -0.663019 2.116677 4.739900  
H -0.212387 2.288549 5.720715  
C -1.944087 2.607805 4.470001  
H -2.493087 3.158782 5.237497  
C -2.523526 2.393483 3.223406  
H -3.527819 2.771180 3.013211  
C -3.686957 -1.761881 -1.005125  
C -4.754607 -2.360394 -0.349535  
H -4.627831 -2.672462 0.688089  
C -5.962302 -2.528583 -1.025380  
H -6.807782 -2.987522 -0.505497  
C -6.114174 -2.114696 -2.351012  
C -5.010830 -1.534999 -2.997332  
H -5.104514 -1.216546 -4.039487  
C -3.804895 -1.354824 -2.334132  
H -2.953934 -0.889103 -2.839752  
C -7.428239 -2.253955 -3.061891  
H -7.966515 -1.291300 -3.082802  
H -8.080868 -2.985815 -2.565280  
H -7.290652 -2.569951 -4.106836

**Ar<sub>2</sub>Ge**

E = -2696.76761525  
Ge -0.000018 -0.000374 -1.452071  
C 1.523023 0.228645 -0.177703  
C 1.553477 1.284510 0.761745  
C 2.647078 -0.613158 -0.314380  
C 2.690984 1.466874 1.551222  
C 3.770462 -0.409027 0.495564  
C 3.792312 0.622251 1.426295  
H 2.715552 2.288815 2.272392  
H 4.636998 -1.067932 0.388489  
H 4.674542 0.778062 2.052115  
C -1.523107 -0.228658 -0.177640



C -1.553424 -1.284105 0.762246  
C -2.647202 0.613051 -0.314613  
C -2.690862 -1.466178 1.551915  
C -3.770499 0.409220 0.495502  
C -3.792220 -0.621650 1.426707  
H -2.715344 -2.287814 2.273434  
H -4.637098 1.068007 0.388199  
H -4.674404 -0.777196 2.052659  
C 2.639782 -1.763532 -1.281740  
H 2.241278 -2.678896 -0.812624  
H 2.007435 -1.551684 -2.162941  
H 3.651668 -1.997585 -1.643249  
C -0.389523 -2.223927 0.918126  
H -0.076430 -2.650638 -0.049957  
H 0.486211 -1.709123 1.342913  
H -0.643622 -3.068034 1.574371  
C -2.639914 1.762932 -1.282553  
H -2.240922 2.678401 -0.814057  
H -2.007952 1.550390 -2.163864  
H -3.651851 1.997153 -1.643802  
C 0.389658 2.224491 0.917270  
H 0.077197 2.651481 -0.050898  
H -0.486379 1.709720 1.341454  
H 0.643554 3.068389 1.573858

**NTMS<sub>2</sub>Ge**

E = -3822.57232294  
Ge 0.092987 -0.279977 -1.288509  
N 1.504425 0.114987 -0.104581  
N -1.431668 -0.184234 -0.163824  
Si -1.712696 -1.519941 0.961659  
Si -2.748074 0.870743 -0.679463  
Si 3.020559 -0.717809 -0.485150  
Si 1.405401 1.526146 0.964334  
C -0.094932 -2.243183 1.595498  
H 0.483576 -2.722706 0.790544  
H 0.551855 -1.491716 2.065366  
H -0.331699 -3.023088 2.337549  
C -2.591643 -2.937769 0.080666  
H -2.013829 -3.255239 -0.802458  
H -2.687207 -3.807859 0.750669  
H -3.599796 -2.662899 -0.260878  
C -2.769546 -0.991705 2.427923  
H -2.950153 -1.865982 3.074201  
H -2.277887 -0.218281 3.036032  
H -3.751951 -0.607351 2.114029  
C -3.036730 2.228392 0.592433  
H -3.845147 2.899125 0.258586  
H -3.328104 1.808693 1.567096  
H -2.133283 2.836970 0.747276  
C -4.374911 -0.041131 -0.943696  
H -4.752672 -0.516604 -0.025993  
H -5.141666 0.673593 -1.284289  
H -4.272816 -0.820371 -1.714673  
C -2.303488 1.675223 -2.327665  
H -1.376505 2.269888 -2.298023  
H -2.200054 0.929504 -3.131517  
H -3.116966 2.362341 -2.613045  
C 0.248815 1.315180 2.426538  
H -0.772367 1.107676 2.084222

H 0.569493 0.499634 3.092218  
H 0.237539 2.246236 3.016336  
C 3.080910 1.998840 1.688317  
H 3.873323 2.123255 0.936771  
H 2.955289 2.968354 2.198126  
H 3.426569 1.276673 2.442379  
C 0.820175 2.992484 -0.066328  
H -0.174588 2.814270 -0.502084  
H 0.752051 3.907473 0.543691  
H 1.521140 3.184727 -0.894076  
C 3.839920 -1.372824 1.075572  
H 4.239400 -0.575075 1.716794  
H 3.123326 -1.964051 1.666664  
H 4.679023 -2.032718 0.801209  
C 4.211461 0.375641 -1.450538  
H 5.114481 -0.189695 -1.732341  
H 3.730094 0.726860 -2.377285  
H 4.534716 1.260721 -0.883690  
C 2.657561 -2.216135 -1.575320  
H 1.943499 -2.915004 -1.110378  
H 2.268347 -1.941708 -2.567637  
H 3.599890 -2.767673 -1.729980

**Boryl-Amino-Germylene**

E = -2871.83948483

Ge -0.037548 -0.870516 0.695726  
N 1.093354 0.205323 -0.301727  
Si 2.858165 0.037060 -0.127107  
C 3.597199 1.752207 0.113937  
H 3.428919 2.402400 -0.758467  
H 3.160925 2.246431 0.996653  
H 4.685661 1.681989 0.269853  
C 3.564935 -0.723021 -1.697785  
H 4.660286 -0.817669 -1.624548  
H 3.147120 -1.728828 -1.861527  
H 3.343940 -0.114522 -2.588398  
C 3.299121 -1.040420 1.340103  
H 2.899510 -0.632885 2.281074  
H 2.912723 -2.064374 1.231239  
H 4.397325 -1.091266 1.426110  
C -4.126236 0.042504 -0.465955  
C -3.744809 1.295761 -0.101047  
H -5.102398 -0.296150 -0.810652  
H -4.344490 2.204455 -0.067522  
B -1.905705 -0.065035 0.114216  
N -3.048227 -0.814950 -0.338078  
N -2.408736 1.277626 0.258710  
C -1.725648 2.456045 0.720074  
H -0.692843 2.198184 0.989850  
H -1.688443 3.236859 -0.058657  
H -2.214260 2.884845 1.610735  
C -3.140169 -2.214013 -0.658678  
H -3.259993 -2.382976 -1.742396  
H -2.223180 -2.727712 -0.336827  
H -3.991463 -2.687892 -0.142958  
C 0.682259 1.163161 -1.316669  
H -0.399783 1.092758 -1.503305  
H 0.905395 2.205073 -1.022346  
H 1.196162 0.984774 -2.278968

**IMe**

-304.554299237

C -0.678936 1.212233 -0.000014  
C 0.679085 1.212116 0.000004  
C -0.000156 -0.972594 -0.000034  
H 1.388258 2.036234 -0.000013  
H -1.387824 2.036624 -0.000025  
N -1.057273 -0.118211 -0.000019  
N 1.057133 -0.118681 -0.000039  
C -2.426604 -0.578116 0.000007  
H -2.625737 -1.189186 0.891240  
H -3.106367 0.284346 -0.000233  
H -2.625611 -1.189586 -0.890977  
C 2.426567 -0.578020 0.000065  
H 2.626062 -1.190020 -0.890513  
H 3.105955 0.284676 -0.000802  
H 2.626500 -1.188557 0.891561

**CAAC1**

-834.834550807

C -1.326643 -0.118960 -1.026097  
C -2.765329 -0.253378 -0.566486  
C -2.698132 -0.568925 0.947132  
H -2.833092 -1.650300 1.105000  
H -3.481812 -0.058626 1.526824  
C -1.293994 -0.158551 1.406351  
C -3.459179 1.082890 -0.858786  
H -2.997075 1.916134 -0.308267  
H -4.521352 1.032562 -0.569734  
H -3.398758 1.320238 -1.930885  
C -3.455459 -1.366908 -1.351612  
H -3.456694 -1.137314 -2.427075  
H -4.498500 -1.491603 -1.016872  
H -2.935667 -2.328260 -1.215474  
C -1.269295 1.199601 2.105468  
H -1.766034 1.113101 3.083310  
H -1.795676 1.972561 1.529932  
H -0.236995 1.536220 2.282514  
C -0.646959 -1.184764 2.329232  
H 0.405052 -0.935860 2.534171  
H -0.690582 -2.199944 1.913763  
H -1.184519 -1.194335 3.289197  
C 0.831550 0.057573 -0.003828  
C 1.622740 -1.106453 -0.051421  
C 3.012276 -0.958836 -0.028309  
H 3.646632 -1.847124 -0.058727  
C 3.599198 0.300947 0.010681  
H 4.687291 0.397072 0.038213  
C 2.800852 1.437549 -0.029877  
H 3.269918 2.423173 -0.062801  
C 1.405707 1.341430 -0.055104  
C 1.006784 -2.473252 -0.277454  
H -0.046915 -2.420060 0.026530  
C 1.006535 -2.775025 -1.778504  
H 0.453481 -1.994671 -2.322833  
H 0.528441 -3.747091 -1.980116  
H 2.034746 -2.811164 -2.172703  
C 1.666844 -3.585899 0.529108  
H 2.703859 -3.769385 0.207348  
H 1.117929 -4.530751 0.395130

H 1.686032 -3.351269 1.604497  
C 0.567298 2.581261 -0.294884  
H -0.466847 2.345218 -0.017718  
C 0.552812 2.887535 -1.794908  
H 1.568225 3.104985 -2.163186  
H -0.082434 3.762627 -2.006615  
H 0.156425 2.026169 -2.352999  
C 1.003990 3.787978 0.528538  
H 1.034147 3.558331 1.604822  
H 0.304115 4.624476 0.378784  
H 2.002398 4.148523 0.235415  
N -0.596473 -0.081215 0.059300

## Mechanism

**Ylide YH**

E = -1893.46167059  
S 0.981370 -1.755430 -1.706342  
P -1.031435 0.028744 -0.256627  
O 1.272818 -1.981529 -3.123488  
O 0.741191 -2.894453 -0.810503  
C -0.307688 -0.628955 -1.647665  
C -1.047798 -1.142198 1.122105  
C -1.478532 -2.450568 0.864066  
H -1.730970 -2.744231 -0.155594  
C -1.531015 -3.375957 1.901057  
H -1.858925 -4.397214 1.696307  
C -1.137713 -3.009365 3.188012  
H -1.170197 -3.742849 3.997337  
C -0.688779 -1.714250 3.441532  
H -0.367040 -1.430213 4.445990  
C -0.643945 -0.777787 2.410924  
H -0.282076 0.232949 2.608191  
C -0.335354 1.587901 0.402046  
C 0.931307 2.002029 -0.014456  
H 1.486224 1.398448 -0.735229  
C 1.478974 3.181823 0.488242  
H 2.473036 3.494885 0.160629  
C 0.760020 3.952980 1.398792  
H 1.188659 4.878744 1.790417  
C -0.514587 3.550818 1.804569  
H -1.084341 4.162353 2.508200  
C -1.064208 2.373419 1.306224  
H -2.067214 2.065597 1.614953  
C -2.745063 0.500771 -0.646274  
C -3.843400 -0.179542 -0.114159  
H -3.691243 -1.001355 0.588864  
C -5.135492 0.196751 -0.478667  
H -5.991850 -0.335010 -0.057688  
C -5.334321 1.244959 -1.374826  
H -6.348166 1.535265 -1.660171  
C -4.238597 1.927511 -1.904269  
H -4.391456 2.752837 -2.603408  
C -2.946779 1.562844 -1.537451  
H -2.090844 2.111134 -1.940357  
C 2.412705 -0.934242 -1.007404  
C 3.233751 -0.167983 -1.829048  
H 3.050182 -0.163286 -2.905811  
C 4.262746 0.578230 -1.257953  
H 4.909429 1.183388 -1.899606  
C 4.486318 0.565949 0.124601  
C 3.664776 -0.242652 0.923093  
H 3.836451 -0.281525 2.002671  
C 2.637896 -0.997381 0.367107  
H 2.000324 -1.635686 0.983015  
C 5.579373 1.386643 0.744632  
H 6.298820 0.750308 1.283965  
H 5.171331 2.102292 1.476504  
H 6.135796 1.956850 -0.012221  
H -0.545976 -0.180588 -2.613143

**Tetragermane 4**

E = -15876.3778431

C -0.462393 2.945333 1.534500  
C -0.696557 2.605399 2.870791  
H -0.786790 1.556730 3.165619  
C -0.815887 3.611921 3.829451  
H -1.008050 3.335970 4.868852  
C -0.694702 4.957800 3.477237  
H -0.791874 5.734961 4.239099  
C -0.450409 5.313352 2.152335  
H -0.368002 6.366768 1.870943  
C -0.339021 4.306076 1.190021  
C -0.314100 3.119694 -1.277610  
C -2.945548 -0.462205 -1.534217  
C -2.605717 -0.696212 -2.870562  
H -1.557076 -0.786532 -3.165461  
C -3.612306 -0.815272 -3.829185  
H -3.336435 -1.007306 -4.868631  
C -4.958150 -0.693972 -3.476879  
H -5.735365 -0.790930 -4.238712  
C -5.313598 -0.449845 -2.151918  
H -6.366990 -0.367362 -1.870456  
C -4.306256 -0.338725 -1.189643  
C -3.119731 -0.314272 1.277930  
C -5.187813 1.730703 0.703125  
C -6.375967 2.191204 0.122251  
H -7.047779 1.496703 -0.389136  
C -6.706102 3.541940 0.197063  
H -7.632114 3.901697 -0.258001  
C -5.855069 4.433783 0.853349  
H -6.118375 5.492945 0.913076  
C -4.679801 3.973091 1.444633  
H -4.018552 4.660863 1.977304  
C -4.343207 2.622567 1.369922  
H -3.434037 2.244998 1.842391  
C -5.971394 -1.060616 1.149848  
C -5.888362 -2.424509 0.838781  
H -5.079746 -2.790519 0.201694  
C -6.816020 -3.311928 1.369336  
H -6.740296 -4.375942 1.134677  
C -7.821652 -2.844634 2.217618  
H -8.546996 -3.544516 2.639577  
C -7.890516 -1.492189 2.545175  
H -8.665471 -1.131298 3.225253  
C -6.961617 -0.595404 2.018253  
H -6.993156 0.460324 2.295570  
C 0.314157 -3.119584 -1.278304  
C 0.338917 -4.306526 1.189053  
C 0.450181 -5.314023 2.151150  
H 0.367754 -6.367373 1.869517  
C 0.694385 -4.958782 3.476151  
H 0.791452 -5.736118 4.237846  
C 0.815625 -3.612989 3.828674  
H 1.007713 -3.337280 4.868152  
C 0.696431 -2.606246 2.870230  
H 0.786701 -1.557650 3.165302  
C 0.462337 -2.945864 1.533846  
C -1.730615 -5.187909 -0.703694  
C -2.190941 -6.376281 -0.123129  
H -1.496320 -7.048202 0.387951

C -3.541662 -6.706499 -0.197861  
H -3.901285 -7.632678 0.256969  
C -4.433662 -5.855327 -0.853755  
H -5.492812 -6.118693 -0.913419  
C -3.973141 -4.679840 -1.444737  
H -4.661043 -4.018480 -1.977104  
C -2.622631 -4.343169 -1.370116  
H -2.245191 -3.433824 -1.842356  
C 1.060715 -5.971188 -1.150855  
C 0.595481 -6.961241 -2.019441  
H -0.460279 -6.992808 -2.296633  
C 1.492284 -7.889933 -2.546696  
H 1.131377 -8.664758 -3.226915  
C 2.844767 -7.821019 -2.219303  
H 3.544660 -8.546197 -2.641529  
C 3.312080 -6.815545 -1.370845  
H 4.376119 -6.739772 -1.136318  
C 2.424641 -5.888105 -0.839944  
H 2.790650 -5.079597 -0.202719  
C 2.945516 0.462410 -1.534111  
C 2.605655 0.696606 -2.870414  
H 1.557003 0.786857 -3.165296  
C 3.612227 0.815941 -3.829021  
H 3.336331 1.008126 -4.868432  
C 4.958085 0.694724 -3.476740  
H 5.735288 0.791899 -4.238557  
C 5.313562 0.450398 -2.151824  
H 6.366963 0.367969 -1.870379  
C 4.306235 0.339006 -1.189564  
C 3.119708 0.313957 1.278005  
C 5.188006 -1.730681 0.702773  
C 6.376241 -2.190915 0.121854  
H 7.048017 -1.496218 -0.389314  
C 6.706502 -3.541639 0.196337  
H 7.632577 -3.901189 -0.258762  
C 5.855511 -4.433734 0.852336  
H 6.118912 -5.492887 0.911803  
C 4.680166 -3.973306 1.443671  
H 4.018965 -4.661285 1.976137  
C 4.343445 -2.622796 1.369291  
H 3.434211 -2.245428 1.841805  
C 5.971328 1.060622 1.150035  
C 6.961582 0.595362 2.018379  
H 6.993183 -0.460395 2.295577  
C 7.890445 1.492135 2.545384  
H 8.665425 1.131208 3.225415  
C 7.821523 2.844610 2.217963  
H 8.546846 3.544477 2.639983  
C 6.815865 3.311947 1.369738  
H 6.740096 4.375979 1.135175  
C 5.888236 2.424544 0.839107  
H 5.079612 2.790583 0.202045  
C 1.730715 5.187805 -0.702286  
C 2.622770 4.343216 -1.368850  
H 2.245348 3.434027 -1.841403  
C 3.973310 4.679829 -1.443190  
H 4.661243 4.018585 -1.975659  
C 4.433823 5.855110 -0.851791  
H 5.492998 6.118431 -0.911233  
C 3.541789 6.706133 -0.195750

H 3.901410 7.632142 0.259427  
C 2.191041 6.375969 -0.121294  
H 1.496395 7.047762 0.389922  
C -1.060537 5.971325 -1.149541  
C -0.595149 6.961647 -2.017738  
H 0.460651 6.993270 -2.294772  
C -1.491844 7.890544 -2.544815  
H -1.130814 8.665578 -3.224730  
C -2.844374 7.821573 -2.217628  
H -3.544184 8.546916 -2.639709  
C -3.311838 6.815840 -1.369561  
H -4.375910 6.740028 -1.135199  
C -2.424508 5.888190 -0.838843  
H -2.790646 5.079494 -0.201932  
C 3.541611 2.193513 3.281359  
C 4.618600 2.394165 4.134566  
H 5.085530 1.528505 4.607434  
C 5.090318 3.690454 4.341863  
H 5.949590 3.849522 4.999290  
C 4.494759 4.786043 3.711990  
C 3.397107 4.554571 2.868584  
H 2.913958 5.393618 2.363103  
C 2.919057 3.271093 2.651065  
H 2.072678 3.102321 1.984032  
C 5.006667 6.181550 3.918802  
H 4.276001 6.795838 4.470036  
H 5.186547 6.684804 2.955335  
H 5.946335 6.188577 4.489002  
C -2.193847 3.541998 -3.280639  
C -2.394488 4.619235 -4.133548  
H -1.528830 5.086206 -4.606378  
C -3.690739 5.091165 -4.340542  
H -3.849788 5.950649 -4.997698  
C -4.786323 4.495569 -3.710674  
C -4.554864 3.397715 -2.867540  
H -5.393891 2.914588 -2.362006  
C -3.271407 2.919448 -2.650322  
H -3.102641 2.072934 -1.983457  
C -6.181825 5.007484 -3.917520  
H -6.686637 5.183304 -2.954141  
H -6.794832 4.278606 -4.472565  
H -6.188562 5.949317 -4.484149  
C -3.542120 -2.194192 3.280820  
C -4.619339 -2.394778 4.133761  
H -5.086180 -1.529104 4.606693  
C -5.091401 -3.690994 4.340684  
H -5.950862 -3.850002 4.997880  
C -4.495950 -4.786594 3.710713  
C -3.398083 -4.555195 2.867575  
H -2.915035 -5.394242 2.362002  
C -2.919697 -3.271775 2.650415  
H -2.073170 -3.103059 1.983558  
C -5.008119 -6.182041 3.917294  
H -4.278414 -6.795953 4.470232  
H -5.186160 -6.685831 2.953775  
H -5.948820 -6.188856 4.485793  
C 2.194212 -3.541195 -3.281148  
C 2.395143 -4.618249 -4.134219  
H 1.529628 -5.085265 -4.607267  
C 3.691496 -5.089956 -4.341088



H 3.850774 -5.949298 -4.998375  
C 4.786893 -4.494322 -3.710932  
C 4.555146 -3.396646 -2.867643  
H 5.394020 -2.913497 -2.361877  
C 3.271585 -2.918600 -2.650552  
H 3.102595 -2.072224 -1.983568  
C 6.182498 -5.006017 -3.917621  
H 6.687086 -5.182143 -2.954179  
H 6.795571 -4.276869 -4.472239  
H 6.189474 -5.947640 -4.484595  
Ge -0.316194 1.711904 0.014618  
Ge -1.712015 -0.316281 -0.014397  
Ge 1.712001 0.316107 -0.014317  
Ge 0.316195 -1.712088 0.014233  
O -3.905259 0.353126 3.672226  
O -1.539001 -0.501256 3.287981  
O -0.353031 -3.904891 -3.672743  
O 0.500805 -1.538493 -3.288107  
O 3.905237 -0.353845 3.672208  
O 1.538851 0.500195 3.288003  
O 0.353490 3.905406 -3.671809  
O -0.500715 1.539051 -3.287750  
P 0.000904 4.632792 -0.559321  
P -4.632856 0.000908 0.559778  
P -0.000849 -4.632854 -0.560393  
P 4.632875 -0.000914 0.559792  
S -2.971883 -0.530938 2.948575  
S 0.530796 -2.971422 -2.948921  
S 2.971751 0.530213 2.948695  
S -0.530559 2.971918 -2.948284

#### 4-Int

E = -5862.52678991  
Ge -0.543165 0.019436 -2.103577  
S 1.199658 -0.612042 1.061444  
S -2.764091 1.960096 -0.810217  
P 2.897387 0.857758 -0.796728  
P -3.003231 -0.960391 -0.485541  
O -0.116472 -1.246132 1.162137  
O 1.459930 0.629792 1.812777  
O -4.221941 1.959857 -1.055943  
O -1.949486 2.939450 -1.548124  
C 1.580986 -0.292524 -0.602415  
C 4.280609 0.585107 0.350990  
C 4.501143 1.429737 1.442051  
H 3.854881 2.295105 1.598365  
C 5.533180 1.148217 2.335980  
H 5.705757 1.811899 3.186245  
C 6.336141 0.024647 2.150206  
H 7.144443 -0.190977 2.853078  
C 6.099162 -0.834780 1.076724  
H 6.710832 -1.729262 0.941749  
C 5.070481 -0.560780 0.182815  
H 4.877942 -1.243087 -0.649042  
C 3.607768 0.660937 -2.456673  
C 4.972359 0.896836 -2.674576  
H 5.633188 1.135110 -1.838693  
C 5.494909 0.816434 -3.962684  
H 6.559732 0.997859 -4.125350  
C 4.663530 0.505217 -5.037915

H 5.077242 0.440809 -6.047159  
C 3.304192 0.284258 -4.824187  
H 2.643716 0.053712 -5.663159  
C 2.771293 0.367109 -3.540103  
H 1.694568 0.229330 -3.382906  
C 2.374484 2.573643 -0.642721  
C 1.025915 2.887315 -0.480648  
H 0.277794 2.100279 -0.406399  
C 0.624339 4.220975 -0.440821  
H -0.442306 4.435946 -0.361161  
C 1.573050 5.233684 -0.545535  
H 1.257937 6.279549 -0.514679  
C 2.925924 4.921619 -0.708458  
H 3.667059 5.718744 -0.801738  
C 3.330056 3.593336 -0.768618  
H 4.386073 3.351955 -0.916085  
C 2.338610 -1.842919 1.668743  
C 2.364350 -3.105094 1.072255  
H 1.688875 -3.337527 0.243745  
C 3.250369 -4.059017 1.554132  
H 3.281410 -5.047093 1.086308  
C 4.096293 -3.782954 2.641005  
C 4.022813 -2.520151 3.235077  
H 4.669513 -2.287362 4.085249  
C 3.148574 -1.546235 2.756223  
H 3.095250 -0.552741 3.204673  
C 5.039617 -4.831119 3.153637  
H 5.708053 -4.429246 3.927627  
H 5.662339 -5.240276 2.342822  
H 4.488163 -5.677789 3.593631  
C -2.096619 0.405879 -1.016368  
C -1.934175 -2.341953 -0.941582  
C -2.202123 -3.672640 -0.620617  
H -3.077660 -3.939447 -0.022561  
C -1.331339 -4.665974 -1.066398  
H -1.518725 -5.711311 -0.810056  
C -0.230870 -4.321599 -1.852477  
H 0.441050 -5.103656 -2.217218  
C 0.005411 -2.985663 -2.185587  
H 0.863110 -2.739721 -2.822912  
C -0.829719 -1.963248 -1.722121  
H 1.755716 -1.217538 -1.162589  
C -4.561961 -1.231125 -1.389906  
C -5.526268 -2.115542 -0.894244  
H -5.391848 -2.581601 0.085516  
C -6.669562 -2.386727 -1.641936  
H -7.423128 -3.075582 -1.252845  
C -6.853712 -1.771847 -2.880271  
H -7.753849 -1.980333 -3.463863  
C -5.897136 -0.882374 -3.368154  
H -6.048885 -0.386451 -4.329565  
C -4.750898 -0.609867 -2.626002  
H -4.008540 0.107694 -2.980142  
C -3.491646 -0.987169 1.260357  
C -4.515469 -0.106280 1.642032  
H -5.033163 0.486570 0.882545  
C -4.832330 0.042256 2.987985  
H -5.613095 0.746089 3.284087  
C -4.144344 -0.693922 3.952995  
H -4.394036 -0.574089 5.010327

C -3.135059 -1.576253 3.571779  
H -2.590965 -2.147481 4.327635  
C -2.797575 -1.719949 2.227307  
H -1.970641 -2.366554 1.934417  
C -2.623491 2.364359 0.931572  
C -3.515994 3.294031 1.461893  
H -4.275655 3.738152 0.815309  
C -3.443855 3.608841 2.815544  
H -4.147833 4.332130 3.237282  
C -2.495947 3.004637 3.652581  
C -1.604397 2.084393 3.089580  
H -0.848065 1.595263 3.708771  
C -1.666325 1.761708 1.739139  
H -0.997598 1.009701 1.325746  
C -2.457857 3.302724 5.122841  
H -1.424409 3.418234 5.482899  
H -2.910306 2.478115 5.699189  
H -3.011642 4.220648 5.366406

**TS – addition across Ge–C bond**

E = -5862.46965222  
Ge -0.430909 -0.135972 -1.810139  
S 1.014545 -0.247560 1.334672  
S -2.706796 1.801030 -0.964094  
P 2.593498 0.510297 -1.014756  
P -2.910320 -1.034908 -0.111427  
O -0.300272 -0.846525 1.637858  
O 1.309959 1.075760 1.923278  
O -4.181580 1.754718 -0.900894  
O -2.081895 2.443802 -2.136506  
C 1.212824 -0.300516 -0.364422  
C 3.969120 0.638674 0.165019  
C 4.175532 1.806298 0.903243  
H 3.525266 2.669556 0.752216  
C 5.205495 1.856970 1.840516  
H 5.364805 2.770546 2.417532  
C 6.026433 0.749038 2.041404  
H 6.833239 0.794292 2.776967  
C 5.815834 -0.420407 1.310332  
H 6.447173 -1.295809 1.475988  
C 4.786822 -0.479524 0.377507  
H 4.614235 -1.400133 -0.184096  
C 3.342949 -0.312159 -2.460195  
C 4.675075 -0.025793 -2.792796  
H 5.263671 0.648530 -2.166523  
C 5.258720 -0.608583 -3.914736  
H 6.297783 -0.380758 -4.163285  
C 4.520967 -1.481449 -4.713884  
H 4.981178 -1.940327 -5.592186  
C 3.195529 -1.764462 -4.390838  
H 2.608032 -2.440603 -5.016057  
C 2.607305 -1.180813 -3.270684  
H 1.558788 -1.379666 -3.040553  
C 2.156642 2.187420 -1.562082  
C 1.200931 2.873921 -0.801163  
H 0.775594 2.406992 0.091170  
C 0.792612 4.146515 -1.189489  
H 0.030553 4.662015 -0.602324  
C 1.335501 4.735108 -2.329555  
H 1.001917 5.727590 -2.641617

C 2.288577 4.053182 -3.086447  
H 2.701904 4.509834 -3.988736  
C 2.700336 2.778090 -2.708629  
H 3.425094 2.237006 -3.320152  
C 2.213119 -1.354147 2.074352  
C 2.362766 -2.652687 1.588498  
H 1.771730 -2.987074 0.732439  
C 3.282413 -3.501512 2.190841  
H 3.409063 -4.517322 1.805442  
C 4.051415 -3.078639 3.286760  
C 3.866164 -1.777530 3.762778  
H 4.459433 -1.426897 4.611737  
C 2.951410 -0.912993 3.164965  
H 2.817661 0.112894 3.512567  
C 5.034075 -4.011446 3.932047  
H 5.679145 -3.485271 4.649501  
H 5.679112 -4.496837 3.183344  
H 4.514621 -4.815639 4.478586  
C -2.031684 0.259663 -0.787166  
C -1.896050 -2.490380 -0.503821  
C -2.434330 -3.774214 -0.387117  
H -3.433740 -3.914772 0.032515  
C -1.706593 -4.879808 -0.821214  
H -2.126589 -5.882574 -0.714971  
C -0.449772 -4.701165 -1.401282  
H 0.119485 -5.566152 -1.750886  
C 0.077663 -3.420115 -1.530944  
H 1.077722 -3.289387 -1.955807  
C -0.625789 -2.289443 -1.083931  
H 0.313683 -1.457056 -0.664193  
C -4.502231 -1.355580 -0.944071  
C -5.532906 -2.047337 -0.299761  
H -5.429334 -2.332123 0.750425  
C -6.703039 -2.354376 -0.992036  
H -7.508789 -2.890871 -0.485404  
C -6.847558 -1.965581 -2.322695  
H -7.768232 -2.199997 -2.862697  
C -5.824188 -1.264330 -2.960929  
H -5.943976 -0.941684 -3.997637  
C -4.653324 -0.957224 -2.275041  
H -3.858272 -0.382315 -2.754783  
C -3.352992 -0.970630 1.645284  
C -4.236070 0.047900 2.032033  
H -4.638552 0.734583 1.280114  
C -4.575699 0.187260 3.374364  
H -5.255066 0.986434 3.679200  
C -4.046242 -0.686682 4.324513  
H -4.316056 -0.575152 5.377675  
C -3.165939 -1.695553 3.935832  
H -2.740123 -2.369906 4.682420  
C -2.808912 -1.835519 2.596625  
H -2.084435 -2.593088 2.294364  
C -2.225435 2.800621 0.437809  
C -2.514233 4.166902 0.374819  
H -3.002035 4.576117 -0.512638  
C -2.158776 4.984155 1.439250  
H -2.379473 6.054790 1.392954  
C -1.508777 4.461821 2.570854  
C -1.236131 3.093181 2.604957  
H -0.705943 2.659751 3.456085

C -1.600218 2.256446 1.549611  
H -1.369100 1.190379 1.584559  
C -1.129443 5.360123 3.712037  
H -0.474268 4.843940 4.427539  
H -2.022526 5.700951 4.261585  
H -0.606038 6.261766 3.357737

#### 4-Int without YH

E = -3969.02771301  
Ge -1.292743 -2.409913 -1.283657  
S 0.846440 -0.200232 -2.110907  
P -0.953557 0.290840 0.221132  
O 0.716549 1.247394 -2.369707  
O 0.937940 -1.118418 -3.246050  
C -0.423493 -0.728394 -1.076190  
C -2.229814 -0.724600 0.992889  
C -2.970337 -0.331900 2.108191  
H -2.796848 0.635437 2.587436  
C -3.944888 -1.195792 2.607076  
H -4.532805 -0.906737 3.481258  
C -4.170665 -2.424168 1.985033  
H -4.937919 -3.096289 2.378228  
C -3.426788 -2.796355 0.863139  
H -3.622276 -3.762057 0.386101  
C -2.437865 -1.954391 0.341668  
C -1.684102 1.876313 -0.257893  
C -1.874629 2.882321 0.697032  
H -1.508350 2.749740 1.718589  
C -2.514324 4.065006 0.336057  
H -2.661375 4.852409 1.078778  
C -2.957267 4.244425 -0.974544  
H -3.454254 5.175317 -1.258024  
C -2.755898 3.245680 -1.926390  
H -3.086535 3.394674 -2.956557  
C -2.118598 2.059279 -1.573141  
H -1.923803 1.284391 -2.316247  
C 0.341931 0.669488 1.426869  
C 1.285927 1.653039 1.102445  
H 1.165902 2.242021 0.189189  
C 2.390682 1.844048 1.926424  
H 3.135033 2.598834 1.664790  
C 2.554252 1.063825 3.070981  
H 3.423996 1.217143 3.714501  
C 1.613979 0.086371 3.394119  
H 1.743232 -0.525213 4.289976  
C 0.509816 -0.118811 2.570189  
H -0.219566 -0.895943 2.810881  
C 2.362648 -0.343811 -1.162205  
C 3.360043 0.598427 -1.398514  
H 3.181521 1.389571 -2.129479  
C 4.547412 0.533599 -0.675194  
H 5.329080 1.276210 -0.858099  
C 4.751372 -0.454071 0.294779  
C 3.738250 -1.399830 0.501124  
H 3.877375 -2.181903 1.252537  
C 2.553805 -1.355407 -0.224739  
H 1.761256 -2.084065 -0.042274  
C 6.002876 -0.486374 1.121137  
H 6.787947 0.152497 0.693118  
H 5.802828 -0.128798 2.145316

H 6.401804 -1.508225 1.208519

**TS – oxidative addition at Ge**

E = -5862.45930654

Ge 0.090659 0.442143 -0.827647  
S -1.917367 1.395424 1.269181  
S 2.071876 -1.035407 1.218627  
P -2.440530 -1.260488 0.035036  
P 2.991028 1.368782 0.001687  
O -0.758929 2.307049 1.376014  
O -2.568249 0.916119 2.499648  
O 0.977168 -1.125999 2.196900  
O 3.433325 -0.757105 1.729134  
C -1.454043 0.110776 0.269846  
C -4.054334 -0.871438 -0.706568  
C -5.040149 -0.302931 0.111638  
H -4.874947 -0.227785 1.189928  
C -6.208714 0.195266 -0.456889  
H -6.966581 0.654421 0.181313  
C -6.402493 0.123016 -1.836170  
H -7.321212 0.515607 -2.278936  
C -5.424296 -0.445401 -2.651281  
H -5.575653 -0.502631 -3.731793  
C -4.247101 -0.935667 -2.090241  
H -3.471105 -1.365111 -2.729106  
C -1.478509 -2.231351 -1.143214  
C -0.297116 -1.646044 -1.632544  
H -0.242947 -0.335181 -2.203818  
C 0.542614 -2.401553 -2.458356  
H 1.461918 -1.950393 -2.844157  
C 0.214772 -3.712836 -2.783868  
H 0.890941 -4.304030 -3.406065  
C -0.975456 -4.278992 -2.315152  
H -1.234068 -5.306673 -2.580370  
C -1.820695 -3.543548 -1.489862  
H -2.732076 -3.999392 -1.092810  
C -2.816924 -2.268380 1.493455  
C -3.903900 -3.151152 1.513316  
H -4.602530 -3.184843 0.672744  
C -4.102389 -3.974290 2.618673  
H -4.950276 -4.663053 2.640251  
C -3.222173 -3.909996 3.700116  
H -3.381933 -4.553755 4.568792  
C -2.146694 -3.022680 3.679811  
H -1.461892 -2.966376 4.528871  
C -1.937283 -2.195723 2.578059  
H -1.095131 -1.498763 2.548482  
C -3.202572 2.324310 0.424345  
C -3.177154 2.484026 -0.960206  
H -2.363900 2.045298 -1.544410  
C -4.212069 3.165920 -1.588149  
H -4.201853 3.271154 -2.676608  
C -5.277288 3.705335 -0.853171  
C -5.265285 3.554918 0.537317  
H -6.083994 3.973419 1.129640  
C -4.238735 2.865404 1.178673  
H -4.241713 2.712796 2.259795  
C -6.413571 4.391477 -1.552536  
H -7.050514 4.942751 -0.846641  
H -7.050575 3.657504 -2.074250

H -6.050714 5.100434 -2.312247  
C 1.784037 0.132737 -0.005529  
C 2.494550 2.669621 -1.169665  
C 1.342739 3.403614 -0.840926  
H 0.784733 3.193331 0.078234  
C 0.900513 4.410782 -1.693329  
H -0.002988 4.968287 -1.436190  
C 1.603543 4.701664 -2.862601  
H 1.254333 5.495176 -3.527928  
C 2.757193 3.987325 -3.177819  
H 3.318046 4.221271 -4.085720  
C 3.205452 2.971146 -2.333421  
H 4.115296 2.422726 -2.583254  
C 4.615353 0.741688 -0.520399  
C 4.680023 0.082853 -1.754861  
H 3.776744 -0.012856 -2.363896  
C 5.879845 -0.475264 -2.188260  
H 5.925788 -0.983692 -3.154257  
C 7.014688 -0.397688 -1.380480  
H 7.954797 -0.843089 -1.714647  
C 6.943634 0.231729 -0.138795  
H 7.823655 0.269183 0.507217  
C 5.747325 0.799110 0.294808  
H 5.682834 1.257602 1.282776  
C 3.178613 2.310556 1.543217  
C 4.102586 3.361671 1.607283  
H 4.749556 3.581190 0.753382  
C 4.184750 4.142277 2.756038  
H 4.908390 4.959115 2.808455  
C 3.331296 3.888399 3.831149  
H 3.390165 4.506783 4.730244  
C 2.395166 2.859882 3.753536  
H 1.711198 2.672086 4.583755  
C 2.314163 2.064967 2.611868  
H 1.562865 1.275520 2.547077  
C 2.151542 -2.646507 0.455734  
C 1.164267 -3.588365 0.727850  
H 0.331189 -3.317577 1.378173  
C 1.266975 -4.857034 0.167662  
H 0.489120 -5.596976 0.374694  
C 2.344699 -5.200548 -0.657775  
C 3.330560 -4.235874 -0.901565  
H 4.188119 -4.490950 -1.530490  
C 3.244673 -2.963390 -0.345350  
H 4.024140 -2.218462 -0.518453  
C 2.420273 -6.564353 -1.278357  
H 1.627561 -6.696087 -2.034077  
H 2.280084 -7.356048 -0.526458  
H 3.386499 -6.732501 -1.774209

**Product of Oxidative Addition**

E = -5862.54384995  
Ge -0.574062 -0.736180 -1.408820  
S 2.211065 0.438142 -1.890263  
S -2.220172 2.036877 -1.524866  
P 2.111669 -1.672714 0.139419  
P -3.119928 -0.171638 0.119327  
O 1.258189 1.145728 -2.760355  
O 3.346188 -0.261187 -2.523158  
O -3.505722 2.493445 -0.943557

O -2.121029 1.924390 -2.984979  
C 1.282488 -0.586368 -0.885957  
C 3.746205 -1.073749 0.683040  
C 4.865438 -1.356406 -0.109943  
H 4.751669 -1.929643 -1.030574  
C 6.117206 -0.874408 0.261530  
H 6.985600 -1.094324 -0.363395  
C 6.259288 -0.106934 1.415867  
H 7.242833 0.273360 1.702129  
C 5.145114 0.181418 2.202061  
H 5.249667 0.787336 3.104743  
C 3.890874 -0.301159 1.840331  
H 3.026448 -0.074209 2.465316  
C 1.125583 -1.913097 1.646930  
C 0.612097 -0.749320 2.236649  
H 0.733549 0.208923 1.726565  
C -0.062533 -0.823954 3.450844  
H -0.450028 0.087541 3.909564  
C -0.270564 -2.061991 4.058564  
H -0.810999 -2.121639 5.006679  
C 0.189067 -3.225549 3.444879  
H -0.001494 -4.199321 3.901379  
C 0.895476 -3.153779 2.245917  
H 1.243605 -4.070306 1.768418  
C 2.503645 -3.288542 -0.607354  
C 3.151536 -4.307350 0.103995  
H 3.439715 -4.155366 1.147276  
C 3.455976 -5.508789 -0.529284  
H 3.955002 -6.305725 0.027003  
C 3.138427 -5.688474 -1.877220  
H 3.382879 -6.631125 -2.372749  
C 2.533137 -4.660006 -2.596588  
H 2.312118 -4.786619 -3.658657  
C 2.218463 -3.457763 -1.964631  
H 1.777845 -2.625226 -2.519718  
C 2.958937 1.644487 -0.795217  
C 2.195234 2.247271 0.201230  
H 1.130805 2.014979 0.286959  
C 2.801786 3.138616 1.077579  
H 2.201333 3.607697 1.861249  
C 4.161643 3.457400 0.961953  
C 4.895908 2.865510 -0.071381  
H 5.957010 3.105248 -0.183002  
C 4.304513 1.958894 -0.947615  
H 4.876183 1.465640 -1.735607  
C 4.818322 4.382394 1.944390  
H 5.689786 4.888373 1.504427  
H 5.175121 3.826435 2.828288  
H 4.119492 5.151503 2.305111  
C -1.836939 0.558687 -0.755113  
C -2.573515 -1.901877 0.261982  
C -3.331956 -2.872445 0.925706  
H -4.247903 -2.596814 1.454245  
C -2.925370 -4.203082 0.892945  
H -3.511115 -4.964137 1.413707  
C -1.786440 -4.562769 0.171782  
H -1.477665 -5.610329 0.126619  
C -1.048456 -3.594499 -0.506153  
H -0.170434 -3.901374 -1.078362  
C -1.420614 -2.246761 -0.462405



H -0.664162 -0.975940 -2.923072  
C -4.729272 -0.278265 -0.728266  
C -5.905176 -0.530730 -0.015253  
H -5.888210 -0.575604 1.076792  
C -7.106920 -0.705761 -0.698491  
H -8.026055 -0.899189 -0.140341  
C -7.135517 -0.622986 -2.089807  
H -8.079415 -0.753703 -2.624635  
C -5.963406 -0.358753 -2.798268  
H -5.986812 -0.273277 -3.886946  
C -4.758552 -0.185998 -2.123024  
H -3.846456 0.058079 -2.674573  
C -3.521745 0.461590 1.781614  
C -4.134696 1.719093 1.899127  
H -4.362977 2.285243 0.992707  
C -4.419874 2.234088 3.160814  
H -4.893795 3.214851 3.246110  
C -4.108623 1.504691 4.309221  
H -4.341194 1.911330 5.296522  
C -3.504552 0.254721 4.193377  
H -3.261429 -0.323747 5.088441  
C -3.208218 -0.265788 2.934010  
H -2.724783 -1.239688 2.851665  
C -1.024983 3.269886 -1.043135  
C -1.099566 3.826066 0.231999  
H -1.855044 3.471514 0.936780  
C -0.214896 4.841972 0.580397  
H -0.271449 5.288308 1.577431  
C 0.742093 5.310408 -0.329812  
C 0.789045 4.732487 -1.603519  
H 1.537138 5.076216 -2.322916  
C -0.090349 3.719174 -1.970895  
H -0.053487 3.254356 -2.955917  
C 1.719047 6.382609 0.051284  
H 1.697693 7.217586 -0.666150  
H 2.746660 5.983701 0.054710  
H 1.508385 6.788135 1.051167

GaCl<sub>3</sub> adducts (energies at the def2svp level):

**Y<sub>2</sub>Ge**

E = -9163.55674431  
S 2.029316 1.040255 1.099365  
S -2.013397 0.041703 -1.444572  
P 2.524016 0.198363 -1.765612  
P -2.391641 1.769474 0.968269  
O 0.862034 0.526297 1.946128  
O 2.184013 2.498191 0.992865  
O -0.818154 -0.867758 -1.717478  
O -2.274657 1.098801 -2.434789  
C 1.657992 0.191741 -0.296385  
C 4.268892 0.543407 -1.410441  
C 4.692071 1.874216 -1.307878  
H 3.997450 2.688231 -1.525529  
C 5.996915 2.154830 -0.910843  
H 6.326767 3.193205 -0.832329  
C 6.873315 1.115629 -0.603952  
H 7.894569 1.339101 -0.286544  
C 6.446698 -0.209118 -0.691001  
H 7.129252 -1.024091 -0.440812  
C 5.146464 -0.499040 -1.093846  
H 4.812176 -1.536615 -1.160845  
C 2.327368 -1.430410 -2.520567  
C 2.335355 -2.548709 -1.676896  
H 2.472701 -2.434520 -0.598948  
C 2.119130 -3.817443 -2.204458  
H 2.089362 -4.674415 -1.529297  
C 1.901068 -3.972477 -3.572038  
H 1.712933 -4.966876 -3.983360  
C 1.894322 -2.859745 -4.412653  
H 1.703716 -2.981257 -5.481326  
C 2.100341 -1.585144 -3.891692  
H 2.055296 -0.712564 -4.546153  
C 2.007535 1.444820 -2.973447  
C 2.821677 1.804647 -4.056674  
H 3.814962 1.362431 -4.171919  
C 2.362147 2.738725 -4.980345  
H 2.995156 3.025893 -5.823215  
C 1.094147 3.306717 -4.830192  
H 0.736889 4.035748 -5.561721  
C 0.285801 2.946020 -3.754650  
H -0.712671 3.369505 -3.630368  
C 0.745830 2.020093 -2.821499  
H 0.115500 1.736515 -1.979880  
C 3.506494 0.448301 1.884761  
C 3.619611 -0.908062 2.187574  
H 2.805081 -1.606302 1.979463  
C 4.793785 -1.370916 2.763591  
H 4.879330 -2.434709 3.001261  
C 5.859731 -0.501389 3.042347  
C 5.707015 0.855646 2.742223  
H 6.523037 1.549900 2.959717  
C 4.534464 1.340094 2.166600  
H 4.406055 2.396282 1.926325  
C 7.135371 -1.027543 3.629922  
H 7.789063 -0.214538 3.975262

H 7.696282 -1.615113 2.884235  
H 6.937681 -1.695835 4.481603  
C -1.596203 0.516456 0.111471  
C -1.886230 1.710052 2.695654  
C -1.546466 2.876269 3.387536  
H -1.586141 3.845990 2.886899  
C -1.132567 2.788645 4.714404  
H -0.856578 3.696605 5.255229  
C -1.053828 1.546590 5.343753  
H -0.714511 1.483287 6.380540  
C -1.392491 0.385535 4.649937  
H -1.315783 -0.596309 5.121822  
C -1.811281 0.464016 3.326666  
H -2.047363 -0.457682 2.789505  
C -4.190103 1.550772 0.860288  
C -4.919950 1.076445 1.954975  
H -4.433431 0.949309 2.924340  
C -6.266177 0.752741 1.802111  
H -6.831988 0.378681 2.658240  
C -6.884334 0.896674 0.561251  
H -7.937119 0.630234 0.441494  
C -6.159909 1.377785 -0.528647  
H -6.639211 1.482794 -1.504183  
C -4.815805 1.708271 -0.384975  
H -4.243803 2.058104 -1.248313  
C -2.023160 3.434595 0.350933  
C -2.997574 4.434612 0.264987  
H -4.028736 4.224029 0.557345  
C -2.648511 5.699765 -0.204260  
H -3.410638 6.478674 -0.281162  
C -1.331293 5.968793 -0.575241  
H -1.062084 6.961417 -0.944598  
C -0.357090 4.975526 -0.471078  
H 0.679275 5.180531 -0.747715  
C -0.699410 3.707633 -0.011503  
H 0.074200 2.943054 0.082335  
C -3.458070 -0.991918 -1.452680  
C -3.758929 -1.777810 -0.342758  
H -3.118165 -1.772252 0.541075  
C -4.904367 -2.560987 -0.363014  
H -5.135587 -3.177621 0.509126  
C -5.754757 -2.574908 -1.477047  
C -5.420154 -1.782605 -2.581595  
H -6.070535 -1.783766 -3.460436  
C -4.276894 -0.989213 -2.577913  
H -4.021173 -0.352807 -3.426762  
C -6.991758 -3.422849 -1.473951  
H -7.553539 -3.325607 -2.413235  
H -7.660963 -3.141888 -0.645177  
H -6.739273 -4.486129 -1.336843  
Ge -0.010036 -0.597121 0.296435  
Ga -0.285133 -2.933434 1.027227  
Cl 1.659154 -3.797566 1.670966  
Cl -1.087123 -4.158186 -0.600519  
Cl -1.746781 -2.973784 2.702692

**NTMS<sub>2</sub>Ge**

E = -7125.55800131  
N -1.900373 0.271602 0.025349  
N 0.472719 -1.597283 0.128774

Si 0.940664 -2.002116 1.802383  
Si 1.053471 -2.458513 -1.314253  
Si -2.619881 1.903664 0.329073  
Si -2.991352 -1.105669 -0.394803  
C -0.084083 -0.878472 2.917927  
H 0.201790 0.182115 2.791736  
H -1.167834 -0.974545 2.758606  
H 0.131429 -1.122379 3.970771  
C 2.741778 -1.627915 2.151599  
H 2.965699 -0.565719 1.971431  
H 2.961439 -1.846336 3.209557  
H 3.424564 -2.225954 1.532387  
C 0.598442 -3.814937 2.145468  
H 0.898305 -4.053773 3.178428  
H -0.463668 -4.073409 2.028824  
H 1.186438 -4.462695 1.476496  
C -0.032032 -3.958769 -1.647821  
H 0.350031 -4.499424 -2.529135  
H -0.009091 -4.655337 -0.795389  
H -1.082067 -3.698299 -1.840826  
C 2.813383 -3.065641 -1.111003  
H 2.908307 -3.805375 -0.301169  
H 3.136836 -3.555085 -2.043911  
H 3.493181 -2.225807 -0.907801  
C 0.973987 -1.247638 -2.755255  
H 0.028298 -0.682808 -2.823455  
H 1.801899 -0.525093 -2.686269  
H 1.078722 -1.788931 -3.709243  
C -2.629053 -2.638052 0.613974  
H -1.617057 -3.016208 0.438048  
H -2.743599 -2.430526 1.689045  
H -3.354732 -3.422187 0.344143  
C -4.802091 -0.715193 -0.068683  
H -5.173197 0.213274 -0.523133  
H -5.369784 -1.548306 -0.515984  
H -5.036172 -0.700971 1.005192  
C -2.831542 -1.413475 -2.239378  
H -1.817188 -1.706130 -2.541191  
H -3.517411 -2.216137 -2.554136  
H -3.098642 -0.501802 -2.796825  
C -3.791117 1.803009 1.795897  
H -4.767299 1.355623 1.573721  
H -3.324959 1.234115 2.616154  
H -3.967464 2.826456 2.164066  
C -3.452174 2.496637 -1.244906  
H -3.938421 3.470312 -1.073956  
H -2.686977 2.638575 -2.024943  
H -4.212412 1.804743 -1.634540  
C -1.314181 3.152054 0.798542  
H -0.691151 2.855361 1.655482  
H -0.653993 3.430546 -0.035454  
H -1.854280 4.067076 1.094599  
Ge -0.100852 0.129255 -0.044034  
Ga 1.771319 1.809382 -0.210335  
Cl 2.037825 2.434501 1.869768  
Cl 3.477756 0.593940 -0.838793  
Cl 1.295118 3.324796 -1.699356

**Boryl-Amino-Germylene**

E = -6175.24854007

N 0.157536 1.933564 -0.307090  
Si 1.896265 2.448712 -0.235111  
C 1.889202 4.249591 0.301698  
H 1.404969 4.917010 -0.426627  
H 1.393158 4.379626 1.276662  
H 2.932142 4.586668 0.414860  
C 2.604990 2.264580 -1.956479  
H 3.632876 2.658655 -1.999044  
H 2.640653 1.197555 -2.226950  
H 2.004748 2.801936 -2.707060  
C 2.836530 1.430903 1.012603  
H 2.286751 1.287994 1.954630  
H 3.108924 0.442173 0.616776  
H 3.776095 1.957685 1.247032  
C -4.650139 -0.267138 -0.390030  
C -4.610420 0.720174 0.547277  
H -5.521641 -0.763562 -0.813745  
H -5.439333 1.191052 1.073183  
B -2.464785 0.241056 -0.040923  
N -3.365599 -0.599653 -0.767505  
N -3.295124 1.066442 0.787878  
C -2.930944 2.054594 1.771013  
H -1.837667 2.145874 1.817862  
H -3.347654 3.043311 1.518996  
H -3.290198 1.772256 2.773135  
C -3.099597 -1.597737 -1.777265  
H -3.291755 -1.207546 -2.789765  
H -2.057240 -1.935797 -1.710157  
H -3.735516 -2.481062 -1.617841  
C -0.772585 2.981217 -0.716203  
H -1.777021 2.571529 -0.900551  
H -0.861151 3.770821 0.048140  
H -0.436159 3.463611 -1.650210  
Ge -0.413072 0.242232 -0.071190  
Ga 1.100192 -1.714578 0.201638  
Cl -0.246277 -3.349084 -0.384924  
Cl 1.637271 -1.790384 2.315036  
Cl 2.798635 -1.549127 -1.172732

### 3,5-Me<sub>2</sub>Py

E = -3630.62067414  
C 1.279081 1.162475 -0.060253  
C 2.670237 1.219122 -0.011663  
C 3.353012 0.000052 0.014382  
C 2.670281 -1.219006 -0.011952  
C 1.279102 -1.162367 -0.060678  
N 0.619232 0.000027 -0.077602  
H 0.661397 2.064252 -0.101967  
H 0.661453 -2.064149 -0.102881  
Ga -1.418653 0.000083 -0.001886  
Cl -1.906460 1.851656 -1.022176  
Cl -1.906086 -1.850879 -1.023576  
Cl -1.825495 -0.001091 2.122842  
H 4.447163 0.000077 0.051744  
C 3.390921 -2.531601 0.010026  
H 2.690714 -3.374635 -0.058809  
H 4.099353 -2.606870 -0.828947  
H 3.969312 -2.645858 0.939882  
C 3.390932 2.531689 0.010163  
H 4.095642 2.608768 -0.831806

H 2.690438 3.374859 -0.053893  
H 3.973449 2.643944 0.937661

**Bisylide1**

E = -4723.48289311

C -0.495856 0.622241 0.077222  
C -0.264453 1.902060 0.519877  
C -2.289378 2.919483 -0.285734  
H -3.095683 2.485042 0.321405  
H -2.134009 2.269361 -1.159615  
C -2.590768 4.341999 -0.675998  
H -2.719161 4.976959 0.212892  
H -3.526752 4.367624 -1.252419  
H -1.791343 4.770049 -1.299472  
C 1.343802 3.590455 1.089915  
H 2.238115 3.561503 1.727301  
H 0.576384 4.193824 1.595166  
C 1.671007 4.133167 -0.281791  
H 2.429434 3.513234 -0.780813  
H 2.065301 5.156412 -0.190775  
H 0.774888 4.173646 -0.917046  
C 2.400427 0.440938 -0.686598  
C 3.395561 0.881826 0.194054  
H 3.290692 0.704379 1.265770  
C 4.510576 1.556831 -0.294485  
H 5.285550 1.893387 0.398051  
C 4.634686 1.808754 -1.661246  
H 5.509838 2.340282 -2.042309  
C 3.641894 1.378647 -2.539893  
H 3.735156 1.570026 -3.611168  
C 2.529993 0.691174 -2.056714  
H 1.765277 0.339941 -2.752728  
C 0.542564 -1.662614 -1.335511  
C -0.282753 -1.298018 -2.404903  
H -0.743504 -0.308274 -2.432952  
C -0.578255 -2.226148 -3.399564  
H -1.250048 -1.943686 -4.212586  
C -0.046629 -3.511666 -3.335287  
H -0.288440 -4.242568 -4.110412  
C 0.775183 -3.874446 -2.268201  
H 1.174496 -4.889002 -2.203893  
C 1.068531 -2.955676 -1.266002  
H 1.673484 -3.262568 -0.411834  
C 1.388016 -1.209833 1.477865  
C 2.587286 -1.928165 1.586688  
H 3.271528 -1.995498 0.737029  
C 2.920487 -2.542743 2.790049  
H 3.854344 -3.103240 2.873353  
C 2.063974 -2.437198 3.886706  
H 2.326466 -2.921015 4.830542  
C 0.878868 -1.712057 3.782494  
H 0.207637 -1.625728 4.639386  
C 0.536116 -1.096594 2.580865  
H -0.393421 -0.527730 2.501799  
• -1.094065 2.919188 0.507058  
• 0.915104 2.225762 1.046505  
P 0.905360 -0.412704 -0.074874  
Cl -3.491171 -0.060518 -1.631290  
Cl -3.270165 0.528178 1.984793  
Cl -1.930087 -2.447669 0.585754

Ga -2.279873 -0.312250 0.194830

### Bisylide2

E = -4703.64335090

C -0.356979 -0.696684 -0.298860  
C 0.218734 -1.947995 -0.312596  
C 2.427040 -2.851496 -0.617834  
H 1.919257 -3.666067 -1.154318  
H 2.857835 -2.173263 -1.373485  
C 3.491454 -3.378356 0.308212  
H 3.977280 -2.555419 0.851659  
H 4.262070 -3.911429 -0.267619  
H 3.067575 -4.073617 1.047944  
C -0.230480 -4.322353 0.009723  
H 0.535187 -4.207902 0.785453  
H 0.051390 -5.152467 -0.659856  
H -1.182994 -4.571270 0.507231  
C -1.490854 -3.075055 -1.662118  
H -2.459272 -3.207995 -1.154174  
H -1.351073 -3.897743 -2.383393  
H -1.518649 -2.121779 -2.201600  
C -0.108678 2.137628 -0.748470  
C -0.886879 1.962679 -1.898287  
H -1.049644 0.962946 -2.306537  
C -1.522519 3.056001 -2.480105  
H -2.154714 2.903127 -3.357013  
C -1.379593 4.324059 -1.922923  
H -1.888208 5.179677 -2.373214  
C -0.608871 4.497794 -0.773421  
H -0.516376 5.486945 -0.319588  
C 0.022427 3.408814 -0.181636  
H 0.581471 3.547900 0.744243  
C 2.294539 0.533425 -0.904457  
C 2.317198 0.664984 -2.297900  
H 1.399768 0.903665 -2.840363  
C 3.510620 0.499469 -2.996719  
H 3.519415 0.603905 -4.083953  
C 4.689541 0.210291 -2.309988  
H 5.626075 0.086634 -2.858814  
C 4.670933 0.081692 -0.921798  
H 5.591123 -0.147988 -0.379475  
C 3.477633 0.236440 -0.219641  
H 3.462101 0.109365 0.864035  
C 1.081795 0.966549 1.704507  
C 0.429527 0.196381 2.671941  
H -0.294058 -0.564070 2.369249  
C 0.703261 0.406650 4.021318  
H 0.185331 -0.192194 4.773294  
C 1.622960 1.379142 4.407953  
H 1.831457 1.542797 5.467935  
C 2.281817 2.143261 3.444063  
H 3.008446 2.901286 3.745113  
C 2.015352 1.937893 2.093456  
H 2.548449 2.526449 1.342528  
N -0.391922 -3.086225 -0.725155  
• 1.481675 -2.102700 0.151150  
P 0.692400 0.673148 -0.040627  
Cl -3.570140 -0.269560 -1.683193  
Cl -2.520987 1.368543 1.354722  
Cl -2.853143 -2.195539 1.354112

Ga -2.305563 -0.437722 0.115116

### Bisylide3

E = -5411.93576887

C 0.070117 -0.463003 -0.132961  
P -1.510819 0.198187 -0.120227  
P 1.467863 0.509073 0.012573  
C -1.606517 1.972556 -0.549597  
C -2.381729 0.126209 1.483661  
C 2.980843 -0.470643 0.212779  
C -2.542074 -0.622223 -1.374652  
C 1.407528 1.635188 1.446657  
C 1.867999 1.510968 -1.459799  
C -1.361073 2.945725 0.426988  
C -1.380457 4.296171 0.087923  
C -1.654227 4.685956 -1.222086  
C -1.922561 3.721938 -2.192873  
C -1.921224 -0.734595 2.484194  
C -2.576069 -0.787543 3.712478  
C -1.903189 2.370694 -1.858606  
C -3.691081 0.013571 3.950176  
C -4.151560 0.878355 2.957462  
C -3.498278 0.937977 1.729296  
C 3.410764 -1.226708 -0.883384  
C 4.552266 -2.014029 -0.775203  
C 5.279244 -2.030127 0.413391  
C 4.865323 -1.257417 1.496979  
C 3.715207 -0.479951 1.402099  
C -1.907038 -1.252421 -2.449229  
C -2.667313 -1.846685 -3.453266  
C -4.058566 -1.812360 -3.389594  
C -4.692135 -1.190735 -2.313283  
C -3.937984 -0.598255 -1.304850  
C 1.657385 3.009003 1.389914  
C 1.500467 3.791890 2.532598  
C 1.092168 3.209751 3.731729  
C 0.848195 1.836890 3.793120  
C 1.004348 1.049836 2.655881  
C 3.031176 2.293617 -1.491665  
C 3.362076 3.002025 -2.642174  
C 2.548742 2.916998 -3.774218  
C 1.414696 2.109326 -3.757751  
C 1.078202 1.403373 -2.603626  
H 0.211799 0.740797 -2.586740  
H 0.790479 2.018670 -4.649638  
H 2.814197 3.469500 -4.678702  
H 4.267831 3.612450 -2.662463  
H 3.693684 2.328600 -0.622922  
H 2.839509 -1.226631 -1.812824  
H 4.864903 -2.625919 -1.623616  
H 6.173890 -2.651719 0.497157  
H 5.433056 -1.269760 2.429869  
H 3.387237 0.109228 2.259375  
H 1.937523 3.480342 0.446807  
H 1.686620 4.867244 2.480423  
H 0.960670 3.828389 4.622717  
H 0.525156 1.374877 4.728602  
H 0.811525 -0.026085 2.695622  
H -2.128423 1.618327 -2.617742  
H -2.152645 4.022791 -3.217342



H -1.669581 5.746213 -1.485587  
H -1.181035 5.046066 0.856758  
H -1.163532 2.649656 1.458948  
H -2.209451 -1.468209 4.483952  
H -1.048418 -1.367613 2.312880  
H -3.848833 1.638411 0.967262  
H -5.019969 1.515147 3.141410  
H -4.202664 -0.032029 4.914679  
H -0.816436 -1.323791 -2.470839  
H -4.441585 -0.140854 -0.451569  
H -5.782654 -1.179827 -2.250641  
H -4.654113 -2.287018 -4.173066  
H -2.163646 -2.358342 -4.276167  
Ga 0.195922 -2.448935 0.085125  
Cl -1.823445 -3.299415 0.339617  
Cl 1.098478 -3.406683 -1.688579  
Cl 1.292828 -2.846182 1.971801

#### Bisylide4

E = -5067.20835386  
C -0.005387 -0.395142 -0.411476  
C -1.262286 0.811845 -2.740331  
H -1.332218 -0.151590 -3.270600  
H -2.144626 1.399459 -3.036445  
C 0.040767 1.524864 -3.100205  
H 0.037794 1.737097 -4.181703  
H 0.096748 2.503460 -2.595781  
C 1.285273 0.712150 -2.756742  
H 2.201570 1.217023 -3.096175  
H 1.265078 -0.276441 -3.243159  
C -2.860605 -0.755141 -0.917313  
C -2.654648 -2.131377 -1.055892  
H -1.641021 -2.536136 -1.120674  
C -3.748539 -2.991794 -1.051726  
H -3.583023 -4.068259 -1.130954  
C -5.039916 -2.483270 -0.921395  
H -5.895166 -3.163229 -0.910114  
C -5.243348 -1.109743 -0.788453  
H -6.254613 -0.712835 -0.674404  
C -4.154755 -0.241928 -0.782295  
H -4.309533 0.832034 -0.651850  
C -1.921128 1.878440 -0.094826  
C -2.110253 1.794027 1.292370  
H -2.047072 0.822598 1.795024  
C -2.374270 2.943703 2.029635  
H -2.524960 2.865625 3.108880  
C -2.438436 4.186857 1.398674  
H -2.634565 5.089147 1.982875  
C -2.255938 4.275187 0.021007  
H -2.309368 5.244436 -0.480037  
C -2.004934 3.124457 -0.725816  
H -1.872062 3.216310 -1.805032  
C 2.881807 -0.703431 -0.803600  
C 2.770165 -2.040466 -1.199165  
H 1.810096 -2.436689 -1.536815  
C 3.871079 -2.883959 -1.087030  
H 3.773805 -3.934659 -1.367709  
C 5.077929 -2.395010 -0.589851  
H 5.937668 -3.062379 -0.493472  
C 5.186034 -1.061837 -0.194697

H 6.126496 -0.684952 0.213299  
C 4.087804 -0.213050 -0.294724  
H 4.159207 0.821466 0.047295  
C 1.801504 1.962818 -0.194637  
C 2.527329 2.966274 -0.850558  
H 2.947791 2.792456 -1.843875  
C 2.721865 4.201987 -0.237968  
H 3.284682 4.982387 -0.755407  
C 2.196421 4.440871 1.031928  
H 2.344759 5.412778 1.508697  
C 1.485334 3.440713 1.692643  
H 1.075750 3.621123 2.688703  
C 1.286832 2.204559 1.083789  
H 0.736996 1.414351 1.598353  
P -1.436581 0.351560 -0.973332  
P 1.429468 0.352518 -0.966038  
Cl -1.798241 -1.559927 2.327948  
Cl 0.262939 -3.732338 0.385399  
Cl 1.779203 -1.100266 2.395571  
Ga 0.059224 -1.651882 1.128449

### Bisylide5

E = -3955.66279452  
C 0.453690 0.264715 -0.005776  
Ga -0.979842 -1.147289 0.157831  
Cl -1.599180 -1.951707 -1.811964  
Cl -0.343407 -2.665710 1.611512  
Cl -2.808607 -0.111803 0.914239  
C 1.808000 0.041992 -0.022263  
C -0.242557 1.527215 -0.134404  
N 2.786834 1.026775 0.087597  
N 2.359767 -1.211873 -0.202083  
N -0.737059 1.885453 -1.337849  
N -0.551893 2.273889 0.940937  
C 1.797734 -2.217306 -1.065493  
H 2.602769 -2.663912 -1.677534  
H 1.305902 -3.028750 -0.502942  
H 1.053335 -1.775329 -1.737783  
C 3.394092 -1.682348 0.685686  
H 3.005008 -2.495055 1.325574  
H 4.264116 -2.071074 0.125812  
H 3.734814 -0.865242 1.333316  
C 3.928231 1.013242 -0.797408  
H 3.878400 1.846553 -1.524787  
H 4.874816 1.112806 -0.237975  
H 3.953506 0.070181 -1.355040  
C 2.552849 2.284086 0.734225  
H 3.513898 2.691471 1.087080  
H 2.097950 3.046849 0.069285  
H 1.907304 2.150280 1.607960  
C -0.140046 1.343004 -2.547017  
H 0.933142 1.182239 -2.401517  
H -0.609596 0.384278 -2.822433  
H -0.281128 2.070742 -3.360074  
C -2.093193 2.385869 -1.510886  
H -2.588471 1.756386 -2.265271  
H -2.659330 2.261553 -0.581383  
H -2.123123 3.433552 -1.851222  
C -0.468795 1.751783 2.289961  
H -1.472252 1.744929 2.741348

H -0.089943 0.724555 2.271109  
H 0.200836 2.380008 2.900259  
C -0.999324 3.644858 0.853825  
H -0.477311 4.227834 1.628724  
H -0.743583 4.065940 -0.124985  
H -2.083280 3.749526 1.022426

**CAAC1**

E = -4138.31685131  
C 0.718282 -0.517574 0.716256  
C 1.421965 -1.335099 1.773718  
C 0.341386 -1.487584 2.857566  
H 0.495333 -0.717077 3.627885  
H 0.386316 -2.466212 3.355750  
C -1.010253 -1.259459 2.171816  
C 1.785771 -2.679168 1.111488  
H 0.902214 -3.222660 0.748652  
H 2.292956 -3.311805 1.855700  
H 2.465730 -2.519629 0.262928  
C 2.696763 -0.690557 2.313023  
H 3.460333 -0.609051 1.526389  
H 3.101056 -1.320284 3.120518  
H 2.508280 0.317369 2.706172  
C -1.757729 -2.548561 1.848503  
H -2.110961 -2.988587 2.791926  
H -1.129096 -3.294580 1.347869  
H -2.637275 -2.347409 1.221341  
C -1.921759 -0.363610 2.993324  
H -2.859005 -0.148442 2.461320  
H -1.432600 0.582838 3.254676  
H -2.173525 -0.885769 3.927872  
C -1.534097 -0.046061 -0.047137  
C -2.040587 1.263561 0.074743  
C -3.014942 1.662299 -0.845173  
H -3.423379 2.672435 -0.775495  
C -3.442607 0.822392 -1.862543  
H -4.198496 1.164129 -2.573163  
C -2.879353 -0.438834 -1.998367  
H -3.182894 -1.077654 -2.829997  
C -1.913071 -0.902154 -1.103598  
C -1.526350 2.301962 1.057145  
H -0.726861 1.844175 1.659622  
C -0.900642 3.482148 0.306505  
H -0.163713 3.151832 -0.434922  
H -0.393132 4.153104 1.015239  
H -1.674028 4.065019 -0.218018  
C -2.619913 2.819538 1.993975  
H -3.391707 3.364349 1.428485  
H -2.191491 3.525703 2.721691  
H -3.124938 2.019588 2.551375  
C -1.278140 -2.257270 -1.365250  
H -0.674230 -2.526869 -0.491005  
C -0.320687 -2.203288 -2.557498  
H -0.840498 -1.874893 -3.470454  
H 0.104210 -3.201491 -2.745696  
H 0.510075 -1.506201 -2.389624  
C -2.317688 -3.360856 -1.559021  
H -3.044193 -3.397869 -0.733936  
H -1.822495 -4.341876 -1.623265  
H -2.883240 -3.223740 -2.493291

N -0.565289 -0.546039 0.905409  
Cl 0.541108 1.312554 -2.360890  
Cl 3.401203 -0.638847 -1.379500  
Cl 2.366270 2.263328 0.604561  
Ga 1.730462 0.594945 -0.681037

**CAAC2**

E = -4254.84945253  
C -0.660789 0.133475 0.244411  
C -1.971474 0.698957 0.724186  
C -1.536803 1.700648 1.808254  
H -2.157086 2.606433 1.828018  
H -1.626352 1.223056 2.795803  
C -0.067671 2.039920 1.531873  
C 0.768383 2.023925 2.800277  
H 1.830339 2.205667 2.583506  
H 0.669916 1.073439 3.339144  
H 0.414046 2.828185 3.461368  
C 0.123562 3.384813 0.838793  
H -0.108126 4.181309 1.560170  
H -0.537373 3.516382 -0.026491  
H 1.164864 3.517639 0.513871  
C 1.683455 0.747620 0.143555  
C 2.005689 1.349181 -1.092368  
C 3.325810 1.252260 -1.535963  
H 3.598752 1.700238 -2.493393  
C 4.288410 0.580985 -0.794760  
H 5.316087 0.519063 -1.159753  
C 3.933101 -0.044184 0.391085  
H 4.682655 -0.615520 0.942298  
C 2.624907 0.002927 0.882186  
C 0.987929 2.023933 -1.996001  
H 0.061522 2.159673 -1.426072  
C 0.635723 1.142402 -3.195912  
H 1.531249 0.898164 -3.787438  
H -0.076462 1.666013 -3.852455  
H 0.180432 0.191633 -2.890697  
C 1.444371 3.407227 -2.458564  
H 1.740889 4.050288 -1.616792  
H 0.632690 3.911573 -3.005015  
H 2.302464 3.341780 -3.144840  
C 2.295723 -0.838610 2.103334  
H 1.219432 -0.740332 2.312378  
C 2.562105 -2.320273 1.817364  
H 2.079876 -2.651922 0.890307  
H 2.176217 -2.938219 2.641553  
H 3.642883 -2.512017 1.726987  
C 3.084774 -0.412980 3.343367  
H 4.162347 -0.586237 3.197777  
H 2.774269 -1.011989 4.213193  
H 2.954064 0.647642 3.595417  
C -2.942987 -0.367517 1.252007  
H -2.496103 -0.877299 2.118321  
H -3.075281 -1.138299 0.476146  
C -4.303522 0.224467 1.593831  
H -4.960543 -0.574119 1.972123  
H -4.206764 0.956762 2.416153  
C -4.926883 0.896130 0.377025  
H -5.117503 0.131274 -0.395952  
H -5.902881 1.338957 0.631788

C -3.996151 1.958138 -0.193058  
H -3.907910 2.793391 0.524882  
H -4.419667 2.392120 -1.112770  
C -2.616501 1.391606 -0.508700  
H -1.956591 2.189158 -0.883565  
H -2.698207 0.644980 -1.314500  
N 0.324849 0.889398 0.622217  
Cl -0.773456 -3.000247 1.036470  
Cl -2.178107 -1.808477 -2.127394  
Cl 1.381920 -2.073963 -1.707736  
Ga -0.513714 -1.680944 -0.705391

**IMe**

E = -3608.57365797  
C -3.203079 -0.729485 -0.000154  
C -3.274038 0.630036 -0.000141  
C -1.111855 0.062272 -0.000180  
H -4.131222 1.297288 -0.000310  
H -3.986018 -1.482491 -0.000152  
N -1.868922 -1.052159 -0.000224  
N -1.979575 1.093124 -0.000128  
C -1.333935 -2.404272 -0.000082  
H -0.709401 -2.549817 0.891915  
H -2.168396 -3.114457 -0.000198  
H -0.709079 -2.549890 -0.891839  
C -1.615010 2.500002 -0.000001  
H -1.014726 2.738014 -0.886464  
H -2.534792 3.096251 -0.000654  
H -1.015913 2.738178 0.887231  
Ga 0.928389 0.026162 0.000023  
Cl 1.435783 -1.082020 -1.820415  
Cl 1.697157 2.068023 -0.000278  
Cl 1.435087 -1.081425 1.821020

**DMAP**

E = -3685.86764169  
C 0.796618 1.154923 -0.074502  
C 2.171764 1.204082 -0.041845  
C 2.921453 0.000042 -0.018135  
C 2.171736 -1.203998 -0.041825  
C 0.796601 -1.154815 -0.074506  
N 0.110873 0.000069 -0.083020  
H 0.193270 2.066064 -0.110212  
H 2.655807 2.178639 -0.039600  
H 2.655791 -2.178550 -0.039570  
H 0.193241 -2.065948 -0.110225  
N 4.273407 -0.000013 0.020027  
C 4.997389 -1.250955 0.038352  
H 4.800192 -1.851585 -0.865671  
H 6.072874 -1.044987 0.077422  
H 4.737352 -1.860136 0.920279  
C 4.997503 1.250860 0.038033  
H 4.737991 1.860056 0.920100  
H 6.072995 1.044795 0.076490  
H 4.799903 1.851504 -0.865889  
Ga -1.902772 -0.000033 0.001685  
Cl -2.404162 1.853238 -1.016862  
Cl -2.404127 -1.852702 -1.017913  
Cl -2.352995 -0.000538 2.121372

**IPrMe2**

E = -3844.04156407  
C -2.435413 -0.969425 -0.006980  
C -2.644908 0.386334 -0.017065  
C -0.430114 0.034871 -0.032882  
N -1.062790 -1.155234 -0.014154  
N -1.391815 0.977598 -0.039415  
Ga 1.607966 0.195794 -0.035890  
Cl 2.234752 -0.924797 -1.817921  
Cl 2.340195 2.258473 -0.111665  
Cl 2.236843 -0.780938 1.826499  
C -0.341672 -2.441312 0.033604  
C -0.652232 -3.311738 -1.172049  
C -0.503982 -3.123501 1.382075  
H 0.715761 -2.162733 -0.054165  
H -0.488334 -2.746443 -2.100408  
H 0.040652 -4.165160 -1.177735  
H -1.674671 -3.714281 -1.164807  
H -0.199344 -2.441310 2.187635  
H -1.528759 -3.475278 1.569403  
H 0.161066 -3.998138 1.419683  
C -1.089012 2.418170 -0.006070  
C -1.336391 2.999086 1.377323  
C -1.756278 3.185404 -1.136441  
H -0.006856 2.465096 -0.183379  
H -0.780953 2.431234 2.137669  
H -0.975528 4.037330 1.404260  
H -2.401545 3.005895 1.653696  
H -1.607090 2.674454 -2.098887  
H -2.832491 3.342384 -0.981123  
H -1.287269 4.177009 -1.210622  
C -3.454087 -2.051980 -0.037335  
H -4.436012 -1.643942 0.234250  
H -3.548387 -2.497028 -1.039980  
H -3.225124 -2.861234 0.667407  
C -3.940455 1.115401 -0.035478  
H -4.176300 1.514900 -1.033821  
H -4.752311 0.432514 0.245576  
H -3.954373 1.954158 0.673178

**iPr<sub>2</sub>NH**

E = -3596.18275244  
N -1.087383 0.175256 -0.595534  
H -0.815649 0.194100 -1.584063  
C -2.055593 -0.974705 -0.511226  
C -2.674766 -1.138832 0.865412  
C -1.416560 -2.264813 -0.995428  
H -2.863678 -0.706543 -1.217658  
H -3.287549 -0.276020 1.158251  
H -3.336668 -2.016406 0.846000  
H -1.903470 -1.311974 1.629064  
H -0.934636 -2.150586 -1.976402  
H -0.660984 -2.629315 -0.284105  
H -2.196524 -3.034759 -1.081857  
C -1.737132 1.502483 -0.325473  
C -1.196632 2.535055 -1.301504  
C -1.594844 1.953995 1.120205  
H -2.809527 1.352160 -0.544339  
H -1.365078 2.229319 -2.346734  
H -1.709045 3.495618 -1.149724

H -0.119802 2.697964 -1.145893  
H -1.878398 1.171617 1.834355  
H -0.562661 2.260025 1.337318  
H -2.249465 2.820986 1.291598  
Ga 0.846629 -0.132638 0.108388  
Cl 1.672904 -0.994994 -1.717918  
Cl 1.817620 1.773297 0.509571  
Cl 0.751386 -1.418909 1.851347

**IPr**

E = -4462.26782650  
N 1.072664 0.160927 -1.165448  
C 2.444201 0.206646 -0.738336  
C 2.979898 1.463274 -0.417407  
N -1.072657 0.160999 -1.165414  
C 4.318379 1.502392 -0.021944  
H 4.771315 2.459946 0.243634  
C 5.071804 0.337577 0.059171  
H 6.114292 0.387009 0.382124  
C 4.505001 -0.893092 -0.254296  
H 5.106497 -1.799543 -0.171541  
C 3.173060 -0.989822 -0.663409  
C 2.160715 2.737156 -0.484436  
H 1.109534 2.453877 -0.646707  
C 2.206963 3.519824 0.826637  
H 1.920348 2.881027 1.674039  
H 1.516886 4.376711 0.781457  
H 3.213820 3.919074 1.025651  
C 2.587863 3.597814 -1.673971  
H 3.635860 3.921189 -1.571550  
H 1.962484 4.501475 -1.744441  
H 2.501935 3.048865 -2.624337  
C 2.559780 -2.322955 -1.041668  
H 1.473804 -2.248002 -0.878778  
C 2.797747 -2.619110 -2.524446  
H 3.875386 -2.698808 -2.739095  
H 2.387190 -1.830503 -3.172942  
H 2.322818 -3.570535 -2.810050  
C 3.046932 -3.470840 -0.164405  
H 2.908901 -3.239280 0.900755  
H 4.107885 -3.706478 -0.343749  
H 2.467448 -4.379469 -0.384905  
C 0.000013 0.019538 -0.358316  
C 0.679697 0.393295 -2.464967  
H 1.401881 0.547444 -3.260827  
C -0.679714 0.393356 -2.464942  
H -1.401908 0.547560 -3.260780  
C -2.444173 0.206801 -0.738238  
C -2.979706 1.463436 -0.417046  
C -4.318161 1.502639 -0.021515  
H -4.770974 2.460193 0.244259  
C -5.071721 0.337895 0.059422  
H -6.114186 0.387394 0.382437  
C -4.505083 -0.892781 -0.254305  
H -5.106686 -1.799176 -0.171696  
C -3.173174 -0.989594 -0.663511  
C -2.160383 2.737233 -0.484013  
H -1.109156 2.453805 -0.645737  
C -2.586956 3.597596 -1.673975  
H -3.634977 3.921056 -1.572073

H -2.500666 3.048389 -2.624157  
H -1.961484 4.501195 -1.744429  
C -2.207111 3.520303 0.826795  
H -3.213990 3.919774 1.025254  
H -1.516899 4.377080 0.781642  
H -1.920916 2.881726 1.674504  
C -2.560099 -2.322724 -1.042114  
H -1.474103 -2.247951 -0.879267  
C -2.798207 -2.618510 -2.524945  
H -3.875872 -2.698017 -2.739534  
H -2.323426 -3.569935 -2.810794  
H -2.387593 -1.829817 -3.173297  
C -3.047366 -3.470755 -0.165105  
H -2.909220 -3.239490 0.900103  
H -2.468040 -4.379420 -0.385880  
H -4.108366 -3.706186 -0.344437  
Ga -0.000007 -0.511606 1.617476  
Cl 1.808873 0.233947 2.583576  
Cl -1.808447 0.234761 2.583770  
Cl -0.000476 -2.711380 1.525072

**Me<sub>3</sub>SiN<sub>3</sub>**

E = -3877.04503751

Ga -1.212998 -0.185622 -0.009934  
Cl -0.874852 -1.677750 -1.547173  
Cl -2.428705 1.512387 -0.551326  
N 0.653665 0.723663 0.075621  
N 0.664187 1.956733 0.079927  
N 0.639155 3.079890 0.086924  
Si 2.258214 -0.212958 0.018250  
C 1.911546 -1.833371 0.850582  
C 2.682474 -0.358758 -1.787778  
H 1.219227 -2.442914 0.251632  
H 2.857718 -2.387734 0.958923  
H 1.862315 -0.863997 -2.319836  
H 2.846177 0.627708 -2.247947  
H 3.601298 -0.952451 -1.918727  
Cl -1.460508 -0.963014 1.988275  
H 1.470124 -1.689364 1.847422  
C 3.451268 0.867495 0.964796  
H 3.141469 0.984449 2.014701  
H 3.558874 1.868115 0.517364  
H 4.449057 0.400099 0.959828

**N<sub>2</sub>B**

E = -3949.18485500

Ga -1.850504 -0.787869 -0.135227  
Cl -3.556241 -0.416155 -1.428596  
Cl -0.360240 -2.154747 -1.018489  
Cl -2.359912 -1.452065 1.874963  
N -0.779115 0.872238 0.064921  
N 1.848624 0.374591 0.063410  
B 0.521619 0.633692 0.052715  
C -1.379537 2.212876 0.301659  
C -2.587437 2.066156 1.222759  
H -3.375157 1.464865 0.744718  
H -3.009995 3.057063 1.444814  
H -2.309641 1.577802 2.167400  
C -1.807987 2.786722 -1.048670  
H -2.514828 2.109761 -1.548396



H -0.937252 2.927598 -1.707222  
H -2.296049 3.763246 -0.909570  
C -0.337546 3.120777 0.951997  
H -0.749137 4.128952 1.105287  
H 0.558002 3.219905 0.316218  
H -0.027291 2.727243 1.932439  
C 2.456037 -0.196001 1.305027  
C 3.136696 -1.518965 0.932853  
H 2.344823 -2.250963 0.703213  
H 3.677205 -1.890839 1.817775  
C 4.063006 -1.401195 -0.266281  
H 4.919681 -0.745259 -0.036335  
H 4.493417 -2.387211 -0.499205  
C 3.293871 -0.883243 -1.470645  
H 2.510170 -1.611746 -1.735049  
H 3.951922 -0.779762 -2.348105  
C 2.612684 0.467159 -1.217332  
C 1.334915 -0.478725 2.302024  
H 0.575161 -1.157769 1.887461  
H 0.833173 0.445308 2.628750  
H 1.757389 -0.958701 3.196048  
C 3.433215 0.791001 1.947608  
H 4.360327 0.917310 1.376458  
H 3.711561 0.424987 2.946660  
H 2.964009 1.778986 2.064329  
C 1.619428 0.744648 -2.343542  
H 0.843410 -0.033942 -2.389724  
H 2.152388 0.754044 -3.304859  
H 1.135441 1.727135 -2.223910  
C 3.623115 1.615947 -1.173519  
H 4.025691 1.781735 -2.183542  
H 4.473958 1.419198 -0.511043  
H 3.138500 2.546248 -0.842029

**N<sub>3</sub>P<sub>2</sub>**

E = -5022.82304010

Ga 3.281303 -0.005805 0.136634  
Cl 2.842884 -0.328151 2.266288  
Cl 4.095521 -1.723423 -0.880158  
Cl 4.111456 1.928129 -0.327719  
P 0.138902 -0.096671 0.749186  
P -0.561551 0.313891 -2.042156  
Si -3.253052 1.569514 0.215847  
Si -3.123919 -1.648917 0.060191  
N -1.081111 0.066817 -0.422110  
N -2.430172 0.000949 -0.078287  
N 1.021185 0.277010 -1.669067  
N 1.336132 0.080263 -0.404940  
C -4.210852 2.067921 -1.315229  
H -3.543485 2.138808 -2.188816  
H -4.690050 3.050458 -1.177918  
H -4.998941 1.336677 -1.550480  
C -4.386032 1.369686 1.694611  
H -5.171758 0.616001 1.540942  
H -4.888115 2.328246 1.902074  
H -3.810359 1.089566 2.590088  
C -1.920511 2.829424 0.593390  
H -1.224611 2.978556 -0.246627  
H -1.332608 2.555388 1.483673  
H -2.395749 3.801906 0.799217

C -2.091037 -2.774801 -1.022528  
H -1.044436 -2.843433 -0.687643  
H -2.096546 -2.451872 -2.075536  
H -2.510959 -3.792768 -0.985960  
C -4.888124 -1.590278 -0.567396  
H -4.917367 -1.276514 -1.622024  
H -5.533366 -0.914125 0.011769  
H -5.329202 -2.597839 -0.502554  
C -3.050934 -2.212226 1.844984  
H -2.015626 -2.198312 2.221446  
H -3.429854 -3.241590 1.948787  
H -3.654997 -1.560927 2.494779

**OPMe<sub>3</sub>**

E = -3840.07122226  
P 2.049919 0.046956 0.283977  
C 2.573306 1.676541 -0.261155  
H 3.581637 1.647768 -0.698339  
H 1.841473 2.018793 -1.008501  
H 2.555249 2.362614 0.597598  
C 2.134139 -1.076688 -1.115434  
H 3.173922 -1.197842 -1.451790  
H 1.706796 -2.044956 -0.816967  
H 1.516225 -0.662465 -1.926089  
C 3.186572 -0.531797 1.549572  
H 3.122260 0.141078 2.416496  
H 2.879945 -1.539972 1.863014  
H 4.219410 -0.557015 1.173899  
• 0.639916 0.110066 0.917108  
Ga -1.062298 -0.004313 0.037411  
Cl -2.489334 0.925051 1.349211  
Cl -1.268751 -2.136069 -0.340430  
Cl -0.647673 1.091753 -1.828984

**Pet<sub>3</sub>**

E = -3882.66329648  
P -1.313564 -0.000023 -0.000136  
Ga 1.069276 0.000151 0.000159  
Cl 1.564293 -1.079559 1.830177  
Cl 1.564805 -1.044898 -1.849722  
Cl 1.564416 2.124776 0.020155  
C -1.972435 1.268494 -1.139269  
H -3.057389 1.365697 -0.963533  
H -1.497749 2.211030 -0.821299  
C -1.973035 0.351879 1.667786  
H -3.057933 0.150786 1.663632  
H -1.498407 -0.394723 2.325134  
C -1.972122 -1.620847 -0.529468  
H -3.057014 -1.517329 -0.701943  
H -1.497083 -1.816650 -1.504559  
C -1.657801 -2.746038 0.448204  
H -1.971245 -3.711544 0.025640  
H -0.580691 -2.803627 0.665125  
H -2.184915 -2.616089 1.405004  
C -1.659031 1.761100 2.153687  
H -1.973226 1.877862 3.200906  
H -0.581871 1.977717 2.095871  
H -2.185689 2.524781 1.562392  
C -1.657869 0.984322 -2.602476  
H -1.971591 1.832797 -3.227519

H -0.580684 0.825645 -2.760670  
H -2.184580 0.090443 -2.968213

**Piperidine**

E = -3555.75386714

Ga -1.098949 0.000001 0.033717  
Cl -1.770122 -1.833464 -0.907279  
Cl -1.770118 1.833473 -0.907269  
Cl -1.026025 -0.000011 2.200710  
N 0.893120 0.000002 -0.440734  
C 1.567431 -1.230497 0.034162  
C 3.037703 -1.253076 -0.345866  
C 3.754708 -0.000002 0.144293  
C 3.037705 1.253077 -0.345853  
C 1.567433 1.230495 0.034175  
H 0.909778 0.000008 -1.465236  
H 1.437990 -1.252270 1.128078  
H 1.015024 -2.088047 -0.375818  
H 3.130239 -1.332323 -1.444392  
H 3.498948 -2.162663 0.068809  
H 4.804433 -0.000001 -0.186910  
H 3.773592 -0.000008 1.248402  
H 3.130240 1.332335 -1.444378  
H 3.498951 2.162660 0.068831  
H 1.015027 2.088050 -0.375797  
H 1.437991 1.252258 1.128091

**PPh<sub>3</sub>**

E = -4340.66513619

P -0.351011 -0.000121 0.000295  
C -1.021569 1.367739 0.981879  
C -0.424407 1.653184 2.217405  
C -2.109829 2.123562 0.533237  
C -0.928520 2.686609 3.001575  
C -2.605060 3.157708 1.324918  
C -2.016803 3.438000 2.557324  
H 0.435001 1.069680 2.560869  
H -2.564277 1.906948 -0.436411  
H -0.460880 2.911428 3.962621  
H -3.453282 3.749736 0.973869  
H -2.404890 4.252346 3.173697  
C -1.023060 0.165842 -1.674524  
C -2.110379 -0.602042 -2.104591  
C -0.427947 1.094652 -2.539263  
C -2.606736 -0.433361 -3.395588  
C -0.933210 1.257210 -3.825840  
C -2.020581 0.495374 -4.254252  
H -2.563246 -1.334694 -1.432427  
H 0.430820 1.684905 -2.205873  
H -3.454224 -1.034515 -3.732625  
H -0.467186 1.978336 -4.500852  
H -2.409601 0.622137 -5.267309  
C -1.021653 -1.533892 0.694520  
C -2.108392 -1.522943 1.575267  
C -0.426012 -2.746844 0.322262  
C -2.603635 -2.725554 2.075212  
C -0.930155 -3.942578 0.825322  
C -2.016922 -3.933223 1.700052  
H -2.561667 -0.574723 1.873731  
H 0.432255 -2.752762 -0.356250

H -3.450658 -2.717310 2.764920  
H -0.463723 -4.887467 0.538152  
H -2.405033 -4.874123 2.097248  
Cl 2.563931 -1.476225 -1.520937  
Ga 2.059178 0.000024 -0.001137  
Cl 2.564189 2.054184 -0.520108  
Cl 2.566025 -0.577695 2.036808

**PPr<sub>3</sub>**

E = -4000.38610723  
Ga -0.002045 -0.000364 -1.317805  
C -1.675004 2.225840 1.324626  
P 0.001873 0.000218 1.062153  
C 1.609844 -0.580934 1.697279  
Cl 1.234783 -1.727645 -1.816222  
C -1.304120 -1.100573 1.701639  
Cl -2.117546 -0.208615 -1.810931  
C -0.297467 1.682749 1.699375  
Cl 0.874175 1.935151 -1.815752  
C 2.768437 0.339597 1.318875  
C -1.087309 -2.564750 1.324533  
H 1.756252 -1.572445 1.236804  
H -1.861445 2.048360 0.252149  
H -1.393207 -0.968533 2.793843  
H 0.486831 2.305760 1.237571  
H 1.542467 -0.725647 2.789450  
H -2.236851 -0.731822 1.242720  
H -0.207610 -2.958199 1.860793  
H 2.670250 1.297426 1.856568  
H -0.136002 1.695855 2.791192  
H -2.453961 1.661591 1.864153  
H -0.843808 -2.636263 0.251198  
H 2.706308 0.587494 0.245948  
C -1.807471 3.708973 1.628600  
H -1.081307 4.295111 1.044183  
H -2.812969 4.076012 1.375760  
H -1.631060 3.920611 2.695353  
C 4.119523 -0.286730 1.622132  
H 4.216338 -0.542476 2.689411  
H 4.262966 -1.210295 1.040010  
H 4.939839 0.399711 1.366092  
C -2.304839 -3.420992 1.631304  
H -3.177327 -3.084079 1.050209  
H -2.121176 -4.475027 1.376466  
H -2.572803 -3.375336 2.699001

**SiPr**

E = -4463.46360421  
C -0.000006 0.001052 -0.392339  
C -0.764421 0.313000 -2.564806  
H -1.201878 1.260994 -2.913516  
H -1.195618 -0.500025 -3.166800  
C 0.764367 0.313153 -2.564800  
H 1.195734 -0.499683 -3.166919  
H 1.201631 1.261295 -2.913357  
C -2.445214 0.221143 -0.705422  
C -2.931297 1.501779 -0.382507  
C -4.265304 1.610086 0.013536  
H -4.666320 2.589439 0.284518  
C -5.083562 0.489293 0.081887

H -6.122952 0.592108 0.402292  
C -4.581756 -0.763341 -0.249080  
H -5.232098 -1.637768 -0.185578  
C -3.254283 -0.927047 -0.652691  
C -2.064903 2.744310 -0.442057  
H -1.046600 2.432725 -0.719163  
C -2.555093 3.711974 -1.519972  
H -2.611197 3.229940 -2.508537  
H -1.880995 4.579313 -1.598701  
H -3.561137 4.093050 -1.284367  
C -1.961918 3.429450 0.920235  
H -2.940041 3.815194 1.247632  
H -1.269170 4.283481 0.868895  
H -1.605811 2.729799 1.689289  
C -2.738668 -2.298824 -1.036387  
H -1.638960 -2.257861 -1.022470  
C -3.150109 -3.375394 -0.035231  
H -2.869353 -3.090852 0.987663  
H -2.640812 -4.321925 -0.270194  
H -4.234300 -3.567504 -0.064814  
C -3.190676 -2.668527 -2.451661  
H -4.288513 -2.744821 -2.504018  
H -2.770585 -3.640998 -2.752344  
H -2.882227 -1.918723 -3.196568  
C 2.445192 0.221158 -0.705442  
C 2.931264 1.501779 -0.382448  
C 4.265269 1.610075 0.013604  
H 4.666276 2.589416 0.284639  
C 5.083534 0.489285 0.081902  
H 6.122922 0.592091 0.402316  
C 4.581734 -0.763337 -0.249122  
H 5.232080 -1.637761 -0.185654  
C 3.254266 -0.927031 -0.652754  
C 2.064870 2.744314 -0.441945  
H 1.046525 2.432724 -0.718889  
C 2.554939 3.711902 -1.519988  
H 3.561023 4.092962 -1.284528  
H 1.880853 4.579252 -1.598689  
H 2.610915 3.229808 -2.508532  
C 1.962073 3.429559 0.920307  
H 1.606081 2.729962 1.689462  
H 1.269301 4.283572 0.868993  
H 2.940230 3.815360 1.247534  
C 2.738660 -2.298795 -1.036519  
H 1.638951 -2.257823 -1.022629  
C 3.190713 -2.668451 -2.451793  
H 2.882293 -1.918629 -3.196693  
H 2.770639 -3.640916 -2.752522  
H 4.288553 -2.744738 -2.504111  
C 3.150064 -3.375418 -0.035407  
H 4.234247 -3.567568 -0.065002  
H 2.640735 -4.321921 -0.270413  
H 2.869320 -3.090913 0.987501  
N -1.089248 0.109184 -1.149342  
N 1.089223 0.109203 -1.149360  
Ga 0.000020 -0.574021 1.586679  
Cl 1.805525 0.102384 2.601386  
Cl 0.000089 -2.760521 1.324532  
Cl -1.805533 0.102313 2.601349

**PtBuCl<sub>2</sub>**

E = -4722.82291369  
 P -0.919998 0.394611 -0.000044  
 C -2.245655 -0.907541 -0.000060  
 C -2.009960 -1.745358 -1.261326  
 C -2.009704 -1.745626 1.260980  
 C -3.634155 -0.278723 0.000144  
 H -2.168973 -1.157881 -2.176984  
 H -0.995740 -2.169908 -1.297629  
 H -2.730254 -2.578280 -1.261698  
 H -2.168423 -1.158319 2.176799  
 H -2.730067 -2.578488 1.261376  
 H -0.995511 -2.170266 1.296944  
 H -4.384484 -1.084982 0.000086  
 H -3.801060 0.339863 0.893594  
 H -3.801202 0.340121 -0.893102  
 Ga 1.499158 -0.169075 -0.000002  
 Cl 2.340982 1.811851 -0.000582  
 Cl 1.650442 -1.309823 1.833150  
 Cl 1.650558 -1.310902 -1.832476  
 Cl -1.335807 1.569344 -1.608144  
 Cl -1.335668 1.569165 1.608223

**THF**

E = -3536.31468965  
 C -1.813605 -1.218694 -0.346859  
 O -1.008222 -0.046863 -0.643371  
 C -1.808617 1.161452 -0.576739  
 C -3.069514 0.729236 0.139189  
 C -3.239437 -0.704802 -0.352578  
 H -1.586760 -1.978327 -1.105410  
 H -1.512265 -1.590416 0.645050  
 H -1.223742 1.930543 -0.055416  
 H -1.993569 1.492426 -1.610130  
 H -2.902253 0.746054 1.227443  
 H -3.925027 1.378243 -0.092661  
 H -3.894629 -1.311052 0.287966  
 H -3.654076 -0.718600 -1.372926  
 Ga 0.873698 -0.000709 0.064186  
 Cl 0.380585 0.161533 2.168667  
 Cl 1.622476 1.791366 -0.862985  
 Cl 1.600498 -1.914966 -0.596551

**5. References**

1. T. Scherpf, R. Wirth, S. Molitor, K.-S. Feichtner, V. H. Gessner, *Angew. Chem. Int. Ed.* **2015**, *54*, 8542–8546.
2. G. M. Sheldrick, *Acta Cryst.* **2008**, *A64*, 112–122.
3. GaussView, Version 5.0.9, R. Dennington, T. A. Keith, J. M. Millam, Semichem Inc., Shawnee Mission, KS, 2016.
4. Gaussian 09, Revision E.01, M. J. Frisch, G. W. Trucks, H. B. Schlegel, G. E. Scuseria, M. A. Robb, J. R. Cheeseman, G. Scalmani, V. Barone, G. A. Petersson, H. Nakatsuji, X. Li, M. Caricato, A. V. Marenich, J. Bloino, B. G. Janesko, R. Gomperts, B. Mennucci, H. P. Hratchian, J. V. Ortiz, A. F. Izmaylov, J. L. Sonnenberg, D. Williams-Young, F. Ding, F.

- Lipparini, F. Egidi, J. Goings, B. Peng, A. Petrone, T. Henderson, D. Ranasinghe, V. G. Zakrzewski, J. Gao, N. Rega, G. Zheng, W. Liang, M. Hada, M. Ehara, K. Toyota, R. Fukuda, J. Hasegawa, M. Ishida, T. Nakajima, Y. Honda, O. Kitao, H. Nakai, T. Vreven, K. Throssell, J. A. Montgomery, Jr., J. E. Peralta, F. Ogliaro, M. J. Bearpark, J. J. Heyd, E. N. Brothers, K. N. Kudin, V. N. Staroverov, T. A. Keith, R. Kobayashi, J. Normand, K. Raghavachari, A. P. Rendell, J. C. Burant, S. S. Iyengar, J. Tomasi, M. Cossi, J. M. Millam, M. Klene, C. Adamo, R. Cammi, J. W. Ochterski, R. L. Martin, K. Morokuma, O. Farkas, J. B. Foresman, and D. J. Fox, Gaussian, Inc., Wallingford CT, 2016.
5. a) P. Hohenberg, W. Kohn, *Phys. Rev.* **1964**, *136*, B864; b) W. Kohn, L. J. Sham, *Phys. Rev.* **1965**, *140*, A1133.
  6. C. Adamo, V. Barone, *J. Chem. Phys.* **1999**, *110*, 6158.
  7. F. Weigend, R. Ahlrichs, *Phys. Chem. Chem. Phys.* **2005**, *7*, 3297.
  8. a) S. Grimme, J. Antony, S. Ehrlich, H. Krieg, *J. Chem. Phys.* **2010**, *132*, 154104; b) S. Grimme, S. Ehrlich, L. Goerigk, *J. Comput. Chem.* **2011**, *32*, 1456; c) D. G. A. Smith, L. A. Burns, K. Patkowski, C. D. Sherrill, *J. Phys. Chem. Lett.* **2016**, *7*, 2197.
  9. C.E. Check, T.O. Faust, J.M. Bailey, B.J. Wright, T.M. Gilbert, L.S. Sunderlin, *J. Phys. Chem. A* **2001**, *105*, 8111.
  10. P. J. Hay, W. R. Wadt, *J. Chem. Phys.* **1985**, *82*, 299.
  11. J. Tomasi, B. Mennucci, R. Cammi, *Chem. Rev.* **2005**, *105*, 2999–3093.
  12. P. Deglmann, F. Furche, R. Ahlrichs, *Chem. Phys. Lett.* **2002**, *362*, 511.
  13. Gaussian NBO Version 3.1, E. D. Glendening, A. E. Reed, J. E. Carpenter, and F. Weinhold.
  14. A. El-Hellani, J. Monot, S. Tang, R. Guillot, C. Bour, V. Gandon, *Inorg. Chem.* **2013**, *52*, 11493–11502.
